# Supplementary material for: Transcriptome Profiling of the Liver in Nellore Cattle Phenotypically Divergent for RFI in Two Genetic Groups
Source: MDPI journal article supplement (doi:10.3390/ani13030359), 2023-01-20
Supplement: s1 [file s1]

**Table S2.** Eighty-eight common DEGs in G1 and G2 for LRFI (p≤0.05).

| Gene Name                                            | Gene Symbol      | Genetic group 1     |         |       | Genetic group 2     |         |       |
|------------------------------------------------------|------------------|---------------------|---------|-------|---------------------|---------|-------|
|                                                      |                  | Fold change (log2)* | P-value | padj  | Fold change (log2)* | P-value | padj  |
| Ankyrin Repeat y SOCS Box Protein 8                  | <i>ASB8</i>      | -<br>0.1495         | 0.0253  | 0.571 | -<br>0.1683         | 0.0056  | 0.308 |
| ATP Binding Cassette Subfamily F Member 3            | <i>ABCF3</i>     | -<br>0.1319         | 0.0412  | 0.571 | -<br>0.1681         | 0.0056  | 0.308 |
| Vascular cell adhesion molecule 1-like               | <i>LOC534578</i> | 0.8064              | 0.0011  | 0.571 | 0.4097              | 0.0253  | 0.445 |
| Integral Membrane Protein 2B                         | <i>ITM2B</i>     | 0.1688              | 0.0025  | 0.571 | 0.1242              | 0.0308  | 0.462 |
| Contactin 4                                          | <i>CNTN4</i>     | 0.9359              | 0.0066  | 0.571 | 0.6749              | 0.0472  | 0.51  |
| Pleckstrin Homology Domain Containing B2             | <i>PLEKHB2</i>   | 0.3896              | 0.0078  | 0.571 | 0.1984              | 0.0323  | 0.468 |
| Zinc finger protein 665                              | <i>ZNF286A</i>   | -<br>0.2862         | 0.0085  | 0.571 | -<br>0.1821         | 0.0373  | 0.483 |
| Transmembrane And Coiled-Coil Domain Family 1        | <i>TMCC1</i>     | -0.2                | 0.0093  | 0.571 | -<br>0.2596         | 0.0009  | 0.22  |
| Adenylosuccinate Synthase 2                          | <i>ADSS</i>      | 0.276               | 0.0097  | 0.571 | 0.1704              | 0.0267  | 0.451 |
| Methionine Adenosyltransferase 2B                    | <i>MAT2B</i>     | 0.2139              | 0.0097  | 0.571 | 0.1131              | 0.0435  | 0.5   |
| Major histocompatibility complex, class II, DR alpha | <i>BoLA-DRB3</i> | 0.4489              | 0.0098  | 0.571 | 0.3182              | 0.0262  | 0.45  |
| Cyclin B3                                            | <i>STX7</i>      | 0.2613              | 0.0106  | 0.571 | 0.1475              | 0.0479  | 0.51  |
| TNF Alpha Induced Protein 8                          | <i>TNFAIP8</i>   | 0.3635              | 0.0107  | 0.571 | 0.2624              | 0.009   | 0.35  |
| F-Box Protein 15                                     | <i>FBXO15</i>    | -<br>0.4387         | 0.0108  | 0.571 | -<br>0.4727         | 0.0367  | 0.48  |
| LRR Binding FLII Interacting Protein 1               | <i>LRRFIP1</i>   | 0.327               | 0.0108  | 0.571 | 0.2132              | 0.0062  | 0.312 |
| Toll Like Receptor 5                                 | <i>TLR5</i>      | 0.5309              | 0.0112  | 0.571 | 0.8541              | 0.0159  | 0.394 |
| Joining Chain Of Multimeric IgA And IgM              | <i>JCHAIN</i>    | 0.5275              | 0.0124  | 0.571 | 0.3372              | 0.0146  | 0.387 |
| Uncharacterized                                      | <i>LOC515089</i> | -<br>0.2801         | 0.0124  | 0.571 | -<br>0.3338         | 0.0054  | 0.306 |
| Cyclin B3                                            | <i>CCNB3</i>     | -<br>0.3393         | 0.0131  | 0.571 | -0.437              | 0.0166  | 0.396 |
| Annexin A1                                           | <i>ANXA1</i>     | 0.3743              | 0.0136  | 0.571 | 0.2777              | 0.0171  | 0.401 |
| Inositol Polyphosphate-5-Phosphatase K               | <i>INPP5K</i>    | -<br>0.1223         | 0.0138  | 0.571 | -<br>0.1309         | 0.0405  | 0.494 |
| Adhesion G Protein-Coupled Receptor A3               | <i>ADGRA3</i>    | -<br>0.1803         | 0.0139  | 0.571 | -<br>0.1609         | 0.0074  | 0.333 |
| Zinc Finger CCHC-Type Containing 7                   | <i>ZCCHC7</i>    | -<br>0.2154         | 0.0143  | 0.571 | -<br>0.2452         | 0.0201  | 0.425 |
| Lymphocyte Cytosolic Protein 1                       | <i>LCPI1</i>     | 0.5266              | 0.0145  | 0.571 | 0.4347              | 0.0078  | 0.338 |
| Major Histocompatibility Complex, Class II, DR Alpha | <i>BoLA-DRA</i>  | 0.4832              | 0.0157  | 0.571 | 0.2185              | 0.0499  | 0.512 |
| CD74 Molecule                                        | <i>CD74</i>      | 0.5054              | 0.0158  | 0.571 | 0.2425              | 0.0213  | 0.432 |
| Transmembrane Protein 50A                            | <i>TMEM50A</i>   | 0.1392              | 0.016   | 0.571 | 0.1724              | 0.0416  | 0.497 |
| Mannose Receptor C Type 2                            | <i>MRC2</i>      | 0.5687              | 0.0169  | 0.571 | 0.3                 | 0.0424  | 0.5   |
| Uncharacterized                                      | <i>LOC788175</i> | 0.5953              | 0.0178  | 0.571 | 0.3008              | 0.027   | 0.451 |
| Adrenoceptor Alpha 1A                                | <i>ADRA1A</i>    | -<br>0.2719         | 0.0193  | 0.571 | -<br>0.2767         | 0.0002  | 0.158 |
| Stathmin 1                                           | <i>STMN1</i>     | 0.4345              | 0.0194  | 0.571 | 0.2428              | 0.0382  | 0.487 |
| Helicase, Lymphoid Specific                          | <i>HELLS</i>     | 0.4887              | 0.0205  | 0.571 | 0.4734              | 0.0255  | 0.446 |
| IFI30 Lysosomal Thiol Reductase                      | <i>IFI30</i>     | 0.4426              | 0.0206  | 0.571 | 0.2357              | 0.0311  | 0.463 |

|                                                                                     |                     |             |        |       |             |        |       |
|-------------------------------------------------------------------------------------|---------------------|-------------|--------|-------|-------------|--------|-------|
| <b>Mitochondrial Trans-2-Enoyl-CoA Reductase Helicase, lymphoid-specific</b>        | <i>MECR</i>         | -<br>0.2213 | 0.0217 | 0.571 | -<br>0.2052 | 0.0095 | 0.353 |
| <b>DENN Domain Containing 10</b>                                                    | <i>FAM45A</i>       | 0.2852      | 0.0223 | 0.571 | 0.1354      | 0.027  | 0.451 |
| <b>Sorting Nexin 2</b>                                                              | <i>SNX2</i>         | 0.214       | 0.0231 | 0.571 | 0.1328      | 0.0299 | 0.46  |
| <b>Sorting nexin 6</b>                                                              | <i>SNX6</i>         | 0.1672      | 0.0234 | 0.571 | 0.1112      | 0.0456 | 0.508 |
| <b>Rho Guanine Nucleotide Exchange Factor 5</b>                                     | <i>ARHGEF5</i>      | -<br>0.2641 | 0.024  | 0.571 | -<br>0.2617 | 0.04   | 0.493 |
| <b>Ribosomal Protein S6 Kinase A1</b>                                               | <i>RPS6KA1</i>      | 0.252       | 0.025  | 0.571 | 0.252       | 0.025  | 0.571 |
| <b>Protein Regulator Of Cytokinesis 1</b>                                           | <i>PRC1</i>         | 0.4199      | 0.0252 | 0.571 | 0.1908      | 0.023  | 0.434 |
| <b>Lumican</b>                                                                      | <i>LUM</i>          | 0.4358      | 0.0263 | 0.571 | 0.3917      | 0.039  | 0.488 |
| <b>Damage Specific DNA Binding Protein 2</b>                                        | <i>DDB2</i>         | 0.1129      | 0.0264 | 0.571 | 0.2711      | 0.0081 | 0.342 |
| <b>FYN Binding Protein 1</b>                                                        | <i>FYB1</i>         | 0.3626      | 0.0266 | 0.571 | 0.192       | 0.024  | 0.437 |
| <b>Granulin Precursor</b>                                                           | <i>GRN</i>          | 0.1808      | 0.0271 | 0.571 | 0.1586      | 0.0036 | 0.282 |
| <b>Pyruvate Kinase M1/2</b>                                                         | <i>PKM</i>          | 0.3742      | 0.0274 | 0.571 | 0.1707      | 0.0364 | 0.479 |
| <b>Tetratricopeptide Repeat Domain 19</b>                                           | <i>TTC19</i>        | -<br>0.1468 | 0.0278 | 0.571 | -<br>0.1329 | 0.0498 | 0.512 |
| <b>ARV1 Homolog, Fatty Acid Homeostasis Modulator</b>                               | <i>ARV1</i>         | -<br>0.1859 | 0.0288 | 0.571 | -0.175      | 0.0308 | 0.462 |
| <b>BTB Domain Containing 6</b>                                                      | <i>BTBD6</i>        | -0.169      | 0.0291 | 0.571 | -<br>0.0768 | 0.0388 | 0.488 |
| <b>Vimentin</b>                                                                     | <i>VIM</i>          | 0.3079      | 0.0291 | 0.571 | 0.3593      | 0.0085 | 0.342 |
| <b>Uncharacterized</b>                                                              | <i>LOC783680</i>    | 0.2802      | 0.0297 | 0.571 | 0.1726      | 0.0247 | 0.441 |
| <b>NPC Intracellular Cholesterol Transporter 2</b>                                  | <i>NPC2</i>         | 0.2977      | 0.0297 | 0.571 | 0.3         | 0.0424 | 0.5   |
| <b>Kelch Like Family Member 36</b>                                                  | <i>KLHL36</i>       | -<br>0.1304 | 0.0301 | 0.571 | -<br>0.1356 | 0.0355 | 0.474 |
| <b>Lymphocyte Cytosolic Protein 2</b>                                               | <i>LCP2</i>         | 0.3456      | 0.0302 | 0.571 | 0.2466      | 0.0003 | 0.161 |
| <b>Rho GTPase Activating Protein 18</b>                                             | <i>ARHGAP18</i>     | 0.3437      | 0.0304 | 0.571 | 0.2553      | 0.0292 | 0.458 |
| <b>Calpain 2</b>                                                                    | <i>CAPN2</i>        | 0.2296      | 0.031  | 0.571 | 0.1569      | 0.0408 | 0.495 |
| <b>Thymus, Brain And Testes Associated</b>                                          | <i>TBATA</i>        | -<br>0.4652 | 0.0319 | 0.571 | -<br>0.5368 | 0.0426 | 0.5   |
| <b>Coactosin Like F-Actin Binding Protein 1</b>                                     | <i>COTL1</i>        | 0.2718      | 0.0321 | 0.571 | 0.1888      | 0.0162 | 0.395 |
| <b>LETM1 Domain Containing 1</b>                                                    | <i>LETMD1</i>       | -<br>0.1713 | 0.0335 | 0.571 | -<br>0.1957 | 0.0442 | 0.504 |
| <b>Toll Like Receptor 2</b>                                                         | <i>TLR2</i>         | 0.3937      | 0.0337 | 0.571 | 0.3998      | 0.0008 | 0.204 |
| <b>Cytochrome B-245 Beta Chain</b>                                                  | <i>CYBB</i>         | 0.5508      | 0.0338 | 0.571 | 0.4176      | 0.0248 | 0.443 |
| <b>Amyloid Beta Precursor Protein Binding Family B Member 1 Interacting Protein</b> | <i>APBB1IP</i>      | 0.3322      | 0.034  | 0.571 | 0.2228      | 0.0061 | 0.31  |
| <b>Uncharacterized</b>                                                              | <i>LOC112446800</i> | -<br>0.5062 | 0.0343 | 0.571 | -<br>0.5978 | 0.0305 | 0.461 |
| <b>P21 (RAC1) Activated Kinase 1</b>                                                | <i>PAK1</i>         | 0.318       | 0.0344 | 0.571 | 0.2334      | 0.0356 | 0.474 |
| <b>Thymosin Beta 4 X-Linked</b>                                                     | <i>TMSB4X</i>       | 0.3005      | 0.035  | 0.571 | 0.3199      | 0.0032 | 0.277 |
| <b>Moesin</b>                                                                       | <i>MSN</i>          | 0.3817      | 0.0356 | 0.571 | 0.1346      | 0.0447 | 0.506 |
| <b>Nuclear Receptor Subfamily 4 Group A Member 2</b>                                | <i>NR4A2</i>        | 0.4061      | 0.0358 | 0.571 | 0.5458      | 0.0214 | 0.433 |
| <b>Integrin Subunit Beta 2</b>                                                      | <i>ITGB2</i>        | 0.4358      | 0.0359 | 0.571 | 0.2014      | 0.0401 | 0.493 |
| <b>Myosin IF</b>                                                                    | <i>MYO1F</i>        | 0.3206      | 0.0366 | 0.571 | 0.1629      | 0.0369 | 0.482 |
| <b>GDNF Inducible Zinc Finger Protein 1</b>                                         | <i>GZF1</i>         | -<br>0.1394 | 0.0369 | 0.571 | -<br>0.2676 | 0.0003 | 0.161 |
| <b>LDL Receptor Related Protein 5</b>                                               | <i>LRP5</i>         | -<br>0.1151 | 0.038  | 0.571 | -<br>0.0944 | 0.0411 | 0.495 |
| <b>Serine Palmitoyltransferase Small Subunit B</b>                                  | <i>SPTSSB</i>       | 0.4723      | 0.04   | 0.571 | 0.5892      | 0.0184 | 0.413 |

|                                                          |                 |             |        |       |             |        |       |
|----------------------------------------------------------|-----------------|-------------|--------|-------|-------------|--------|-------|
| <b>CD63 Molecule</b>                                     | <i>CD63</i>     | 0.0771      | 0.0402 | 0.571 | 0.0907      | 0.0178 | 0.408 |
| <b>Myosin Binding Protein H</b>                          | <i>MYBPH</i>    | 0.9146      | 0.0402 | 0.571 | 0.6306      | 0.0169 | 0.399 |
| <b>Marginal Zone B And B1 Cell Specific Protein</b>      | <i>MZB1</i>     | 0.4825      | 0.0407 | 0.571 | 0.57        | 0.0191 | 0.418 |
| <b>Lymphocyte Antigen 9</b>                              | <i>LY9</i>      | 0.3472      | 0.0409 | 0.571 | 0.3123      | 0.0053 | 0.306 |
| <b>SET Domain And Mariner Transposase Fusion Gene</b>    | <i>SETMAR</i>   | -<br>0.2426 | 0.0409 | 0.571 | -<br>0.2787 | 0.017  | 0.399 |
| <b>Cathepsin S</b>                                       | <i>CTSS</i>     | 0.4946      | 0.041  | 0.571 | 0.3211      | 0.0209 | 0.428 |
| <b>Ecotropic Viral Integration Site 2B</b>               | <i>EVI2B</i>    | 0.2939      | 0.0427 | 0.571 | 0.1647      | 0.0454 | 0.508 |
| <b>Solute Carrier Family 16 Member 9</b>                 | <i>SLC16A9</i>  | 0.5142      | 0.0431 | 0.571 | 0.5586      | 0.0058 | 0.308 |
| <b>Parvin Gamma</b>                                      | <i>PARVG</i>    | 0.3136      | 0.0454 | 0.571 | 0.2878      | 0.0205 | 0.427 |
| <b>TATA-Box Binding Protein Associated Factor 5 Like</b> | <i>TAF5L</i>    | -<br>0.1487 | 0.0454 | 0.571 | -<br>0.1746 | 0.0458 | 0.508 |
| <b>Beta-2-microglobulin</b>                              | <i>B2M</i>      | 0.2578      | 0.046  | 0.571 | 0.2057      | 0.0115 | 0.365 |
| <b>Tubulin alpha 4a</b>                                  | <i>TUBA4A</i>   | -<br>0.2453 | 0.0461 | 0.571 | -<br>0.2353 | 0.0178 | 0.408 |
| <b>FGR Proto-Oncogene, Src Family Tyrosine Kinase</b>    | <i>FGR</i>      | 0.3737      | 0.0462 | 0.571 | 0.202       | 0.0284 | 0.456 |
| <b>Actin beta</b>                                        | <i>ACTB</i>     | 0.2713      | 0.0466 | 0.571 | 0.1693      | 0.0346 | 0.472 |
| <b>Rho GTPase Activating Protein 30</b>                  | <i>ARHGAP30</i> | 0.299       | 0.0469 | 0.571 | 0.1761      | 0.0333 | 0.469 |
| <b>Adaptor Related Protein Complex 4 Subunit Beta 1</b>  | <i>AP4B1</i>    | -<br>0.2135 | 0.0481 | 0.571 | -<br>0.2169 | 0.0301 | 0.46  |
| <b>Death Associated Protein Kinase 1</b>                 | <i>DAPK1</i>    | 0.2284      | 0.0482 | 0.571 | 0.2626      | 0.0192 | 0.418 |
