# Supplementary material for: Transcriptome Profiling of the Liver in Nellore Cattle Phenotypically Divergent for RFI in Two Genetic Groups
Source: MDPI journal article supplement (doi:10.3390/ani13030359), 2023-01-20
Supplement: s1 [file s1]

**Table S4.** The significant biological processes related to Energy Metabolism, Protein turnover, and Redox homeostasis and immune system, in Genetic group 1 in the most efficient group.

| Go Term    | Number of genes | LOR*   | p-value                | padj                   | Biological process                                         |
|------------|-----------------|--------|------------------------|------------------------|------------------------------------------------------------|
| GO:0006490 | 19              | -0.866 | 2.3 x10 <sup>-04</sup> | 1.3x10 <sup>-02</sup>  | oligosaccharide-lipid intermediate biosynthetic process    |
| GO:0042158 | 93              | -0.497 | 2.4 x10 <sup>-06</sup> | 2.6x10 <sup>-04</sup>  | lipoprotein biosynthetic process                           |
| GO:0042157 | 121             | -0.390 | 2.1 x10 <sup>-05</sup> | 1.3x10 <sup>-04</sup>  | lipoprotein metabolic process                              |
| GO:0015980 | 271             | -0.377 | 1.0 x10 <sup>-09</sup> | 2.5 x10 <sup>-07</sup> | energy derivation by oxidation of organic compounds        |
| GO:0006488 | 18              | -0.928 | 1.4 x10 <sup>-04</sup> | 8.7 x10 <sup>-03</sup> | dolichol-linked oligosaccharide biosynthetic process       |
| GO:0010517 | 68              | 0.384  | 1.6 x10 <sup>-03</sup> | 6.7 x10 <sup>-02</sup> | regulation of phospholipase activity                       |
| GO:0043550 | 63              | 0.429  | 7.5 x10 <sup>-04</sup> | 3.6 x10 <sup>-02</sup> | regulation of lipid kinase activity                        |
| GO:0090218 | 37              | 0.560  | 7.5 x10 <sup>-04</sup> | 3.6 x10 <sup>-02</sup> | positive regulation of lipid kinase activity               |
| GO:0032981 | 58              | -1.082 | 2.0 x10 <sup>-22</sup> | 3.6 x10 <sup>-19</sup> | mitochondrial respiratory chain complex I assembly         |
| GO:0033108 | 87              | -1.039 | 3.5 x10 <sup>-28</sup> | 1.8 x10 <sup>-24</sup> | mitochondrial respiratory chain complex assembly           |
| GO:0042776 | 19              | -0.938 | 7.0 x10 <sup>-06</sup> | 6.6 x10 <sup>-04</sup> | mitochondrial ATP synthesis coupled proton transport       |
| GO:0008535 | 21              | -0.895 | 9.4 x10 <sup>-06</sup> | 8.5 x10 <sup>-04</sup> | respiratory chain complex IV assembly                      |
| GO:0042773 | 81              | -0.833 | 1.2 x10 <sup>-12</sup> | 5.1 x10 <sup>-10</sup> | ATP synthesis coupled electron transport                   |
| GO:0022904 | 100             | -0.772 | 8.9 x10 <sup>-14</sup> | 4.4 x10 <sup>-11</sup> | respiratory electron transport chain                       |
| GO:0007260 | 75              | 0.380  | 1.1 x10 <sup>-03</sup> | 4.8 x10 <sup>-02</sup> | tyrosine phosphorylation of STAT protein                   |
| GO:0071900 | 492             | 0.369  | 1.6 x10 <sup>-15</sup> | 9.7 x10 <sup>-13</sup> | regulation of protein serine/threonine kinase activity     |
| GO:0046777 | 236             | 0.474  | 4.5 x10 <sup>-13</sup> | 2.1 x10 <sup>-10</sup> | protein autophosphorylation                                |
| GO:0032147 | 324             | 0.387  | 6.8 x10 <sup>-12</sup> | 2.6 x10 <sup>-09</sup> | activation of protein kinase activity                      |
| GO:0031334 | 234             | 0.440  | 4.0 x10 <sup>-11</sup> | 1.4 x10 <sup>-08</sup> | positive regulation of protein-containing complex assembly |
| GO:190382  | 321             | 0.317  | 2.3 x10 <sup>-08</sup> | 4.2 x10 <sup>-06</sup> | positive regulation of cellular protein localization       |

|                              |     |        |                       |                       |                                                          |
|------------------------------|-----|--------|-----------------------|-----------------------|----------------------------------------------------------|
| <b>9</b>                     |     |        |                       |                       |                                                          |
| <b>GO:004339</b><br><b>3</b> | 209 | 0.265  | $1.4 \times 10^{-04}$ | $8.8 \times 10^{-03}$ | regulation of protein binding                            |
| <b>GO:007163</b><br><b>4</b> | 35  | 0.721  | $1.2 \times 10^{-05}$ | $1.1 \times 10^{-03}$ | regulation of transforming growth factor beta production |
| <b>GO:001810</b><br><b>7</b> | 114 | 0.385  | $5.4 \times 10^{-05}$ | $3.8 \times 10^{-03}$ | peptidyl-threonine phosphorylation                       |
| <b>GO:000722</b><br><b>3</b> | 37  | 0.561  | $1.0 \times 10^{-04}$ | $2.8 \times 10^{-02}$ | Wnt signaling pathway, calcium modulating pathway        |
| <b>GO:190122</b><br><b>4</b> | 75  | 0.493  | $6.4 \times 10^{-05}$ | $2.0 \times 10^{-03}$ | positive regulation of NIK/NF-kappaB signaling           |
| <b>GO:000018</b><br><b>6</b> | 55  | -0.572 | $4.2 \times 10^{-05}$ | $9.8 \times 10^{-03}$ | activation of MAPKK activity                             |
| <b>GO:007037</b><br><b>1</b> | 284 | 0.378  | $4.2 \times 10^{-10}$ | $1.1 \times 10^{-07}$ | ERK1 and ERK2 cascade                                    |
| <b>GO:000276</b><br><b>4</b> | 353 | 0.569  | $8.0 \times 10^{-25}$ | $2.6 \times 10^{-21}$ | immune response-regulating signaling pathway             |
| <b>GO:000225</b><br><b>3</b> | 402 | 0.471  | $7.6 \times 10^{-25}$ | $7.8 \times 10^{-17}$ | activation of immune response                            |
| <b>GO:004578</b><br><b>5</b> | 386 | 0.568  | $1.9 \times 10^{-27}$ | $8.6 \times 10^{-24}$ | positive regulation of cell adhesion                     |
| <b>GO:000181</b><br><b>9</b> | 356 | 0.534  | $2.1 \times 10^{-22}$ | $3.6 \times 10^{-19}$ | positive regulation of cytokine production               |
| <b>GO:004578</b><br><b>7</b> | 359 | 0.288  | $7.4 \times 10^{-08}$ | $1.2 \times 10^{-05}$ | positive regulation of cell cycle                        |
| <b>GO:009769</b><br><b>6</b> | 139 | 0.325  | $1.5 \times 10^{-04}$ | $9.3 \times 10^{-03}$ | receptor signaling pathway via STAT                      |

\*The LOR (Logarithm of Ratio) refer to LRFI group, this value categorizes each biological process in a classification in relation to the rest (total), allowing to identify biological processes, molecular mechanisms and significant cellular components and their regulation within the groups.
