# Supplementary material for: Transcriptome Profiling of the Liver in Nellore Cattle Phenotypically Divergent for RFI in Two Genetic Groups
Source: MDPI journal article supplement (doi:10.3390/ani13030359), 2023-01-20

**Figure S2.** Global statistics and quality control for both genetic group data. (A) Box plot of CPMs distributions for individual conditions for genetic group 1 and genetic group 2 (C), color blue represents the LRFI group and color red represents the HRFI group. (B) PCA plot for genetic group 1 and genetic group 2 (D), color blue represents the LRFI group and color orange represents the HRFI group.

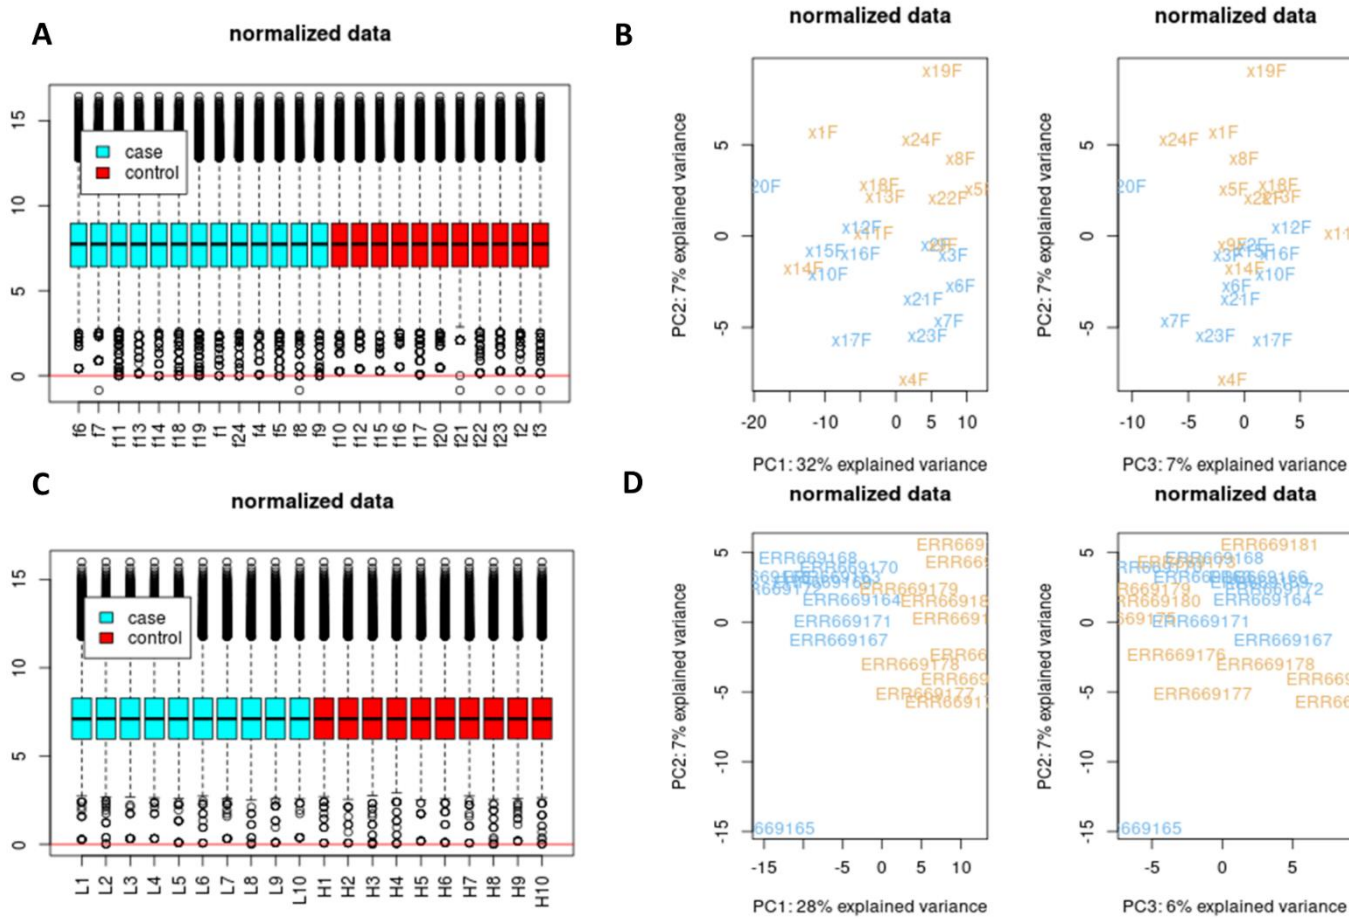

Supplement: s1 [file s1]
