# Supplementary material for: Transcriptome Profiling of the Liver in Nellore Cattle Phenotypically Divergent for RFI in Two Genetic Groups
Source: MDPI journal article supplement (doi:10.3390/ani13030359), 2023-01-20
Supplement: s1 [file s1]

**Table S3.** The significant biological processes, molecular functions and cellular components in Genetic group 1 and Genetic group 2 in the most efficient group.

| <b>The significant biological processes in Genetic group 1 in the most efficient group.</b> |                        |             |               |             |                                                        |
|---------------------------------------------------------------------------------------------|------------------------|-------------|---------------|-------------|--------------------------------------------------------|
| <b>Go term</b>                                                                              | <b>Number of genes</b> | <b>LOR*</b> | <b>pvalue</b> | <b>padj</b> | <b>Biological process</b>                              |
| <b>GO:0140053</b>                                                                           | 161                    | -0.981      | 6.07E-38      | 3.51E-33    | mitochondrial gene expression                          |
| <b>GO:0032543</b>                                                                           | 134                    | -1.021      | 3.16E-35      | 6.08E-31    | mitochondrial translation                              |
| <b>GO:0070126</b>                                                                           | 89                     | -1.104      | 1.77E-34      | 2.56E-30    | mitochondrial translational termination                |
| <b>GO:0070125</b>                                                                           | 88                     | -1.093      | 2.74E-33      | 3.17E-29    | mitochondrial translational elongation                 |
| <b>GO:0033108</b>                                                                           | 87                     | -1.039      | 3.46E-28      | 1.82E-24    | mitochondrial respiratory chain complex assembly       |
| <b>GO:0006415</b>                                                                           | 102                    | -1.001      | 5.55E-28      | 2.67E-24    | translational termination                              |
| <b>GO:0034470</b>                                                                           | 350                    | -0.534      | 1.08E-22      | 2.07E-19    | ncRNA processing                                       |
| <b>GO:0010257</b>                                                                           | 58                     | -1.082      | 2.04E-22      | 3.59E-19    | NADH dehydrogenase complex assembly                    |
| <b>GO:0032981</b>                                                                           | 58                     | -1.082      | 2.04E-22      | 3.59E-19    | mitochondrial respiratory chain complex I assembly     |
| <b>GO:0034660</b>                                                                           | 436                    | -0.458      | 5.36E-21      | 6.59E-18    | ncRNA metabolic process                                |
| <b>GO:0006414</b>                                                                           | 138                    | -0.763      | 2.59E-19      | 2.42E-16    | translational elongation                               |
| <b>GO:0008033</b>                                                                           | 123                    | -0.763      | 3.69E-17      | 2.77E-14    | tRNA processing                                        |
| <b>GO:0006399</b>                                                                           | 176                    | -0.630      | 8.62E-17      | 6.15E-14    | tRNA metabolic process                                 |
| <b>GO:0007005</b>                                                                           | 498                    | -0.374      | 4.61E-16      | 2.99E-13    | mitochondrion organization                             |
| <b>GO:0006120</b>                                                                           | 46                     | -1.000      | 1.40E-14      | 7.84E-12    | mitochondrial electron transport, NADH to ubiquinone   |
| <b>GO:0009451</b>                                                                           | 149                    | -0.625      | 1.72E-14      | 9.45E-12    | RNA modification                                       |
| <b>GO:0042254</b>                                                                           | 279                    | -0.460      | 2.74E-14      | 1.44E-11    | ribosome biogenesis                                    |
| <b>GO:0022904</b>                                                                           | 100                    | -0.772      | 8.85E-14      | 4.41E-11    | respiratory electron transport chain                   |
| <b>GO:0006400</b>                                                                           | 82                     | -0.782      | 2.02E-13      | 9.74E-11    | tRNA modification                                      |
| <b>GO:0006119</b>                                                                           | 121                    | -0.679      | 3.37E-13      | 1.58E-10    | oxidative phosphorylation                              |
| <b>GO:0042773</b>                                                                           | 81                     | -0.833      | 1.18E-12      | 5.07E-10    | ATP synthesis coupled electron transport               |
| <b>GO:0022613</b>                                                                           | 405                    | -0.354      | 2.14E-12      | 8.97E-10    | ribonucleoprotein complex biogenesis                   |
| <b>GO:0042775</b>                                                                           | 80                     | -0.823      | 2.60E-12      | 1.07E-09    | mitochondrial ATP synthesis coupled electron transport |
| <b>GO:0022900</b>                                                                           | 164                    | -0.537      | 2.26E-11      | 8.17E-09    | electron transport chain                               |
| <b>GO:0045333</b>                                                                           | 177                    | -0.506      | 4.25E-11      | 1.45E-08    | cellular respiration                                   |
| <b>GO:0016072</b>                                                                           | 212                    | -0.453      | 4.92E-11      | 1.64E-08    | rRNA metabolic process                                 |
| <b>GO:0006364</b>                                                                           | 202                    | -0.462      | 6.00E-11      | 1.97E-08    | rRNA processing                                        |
| <b>GO:0007007</b>                                                                           | 41                     | -0.917      | 1.52E-10      | 4.67E-08    | inner mitochondrial membrane organization              |
| <b>GO:0006520</b>                                                                           | 343                    | -0.335      | 8.63E-10      | 2.19E-07    | cellular amino acid metabolic process                  |

|                   |     |        |          |          |                                                                |
|-------------------|-----|--------|----------|----------|----------------------------------------------------------------|
| <b>GO:0015980</b> | 271 | -0.377 | 1.02E-09 | 2.54E-07 | energy derivation by oxidation of organic compounds            |
| <b>GO:1990542</b> | 89  | -0.645 | 1.36E-09 | 3.27E-07 | mitochondrial transmembrane transport                          |
| <b>GO:0030150</b> | 18  | -1.155 | 6.31E-09 | 1.36E-06 | protein import into mitochondrial matrix                       |
| <b>GO:0006839</b> | 242 | -0.377 | 7.86E-09 | 1.64E-06 | mitochondrial transport                                        |
| <b>GO:0006506</b> | 31  | -0.955 | 1.71E-08 | 3.31E-06 | GPI anchor biosynthetic process                                |
| <b>GO:0006505</b> | 32  | -0.937 | 1.72E-08 | 3.32E-06 | GPI anchor metabolic process                                   |
| <b>GO:0006626</b> | 96  | -0.557 | 7.76E-08 | 1.27E-05 | protein targeting to mitochondrion                             |
| <b>GO:0006744</b> | 16  | -1.097 | 8.66E-08 | 1.39E-05 | ubiquinone biosynthetic process                                |
| <b>GO:1901663</b> | 16  | -1.097 | 8.66E-08 | 1.39E-05 | quinone biosynthetic process                                   |
| <b>GO:0044743</b> | 33  | -0.851 | 2.52E-07 | 3.58E-05 | protein transmembrane import into intracellular organelle      |
| <b>GO:0071806</b> | 58  | -0.650 | 6.54E-07 | 8.42E-05 | protein transmembrane transport                                |
| <b>GO:0070131</b> | 16  | -1.070 | 9.17E-07 | 1.16E-04 | positive regulation of mitochondrial translation               |
| <b>GO:0065002</b> | 48  | -0.700 | 1.45E-06 | 1.74E-04 | intracellular protein transmembrane transport                  |
| <b>GO:0043628</b> | 34  | -0.770 | 1.48E-06 | 1.76E-04 | ncRNA 3'-end processing                                        |
| <b>GO:0001522</b> | 17  | -1.070 | 1.59E-06 | 1.88E-04 | pseudouridine synthesis                                        |
| <b>GO:0015985</b> | 20  | -0.962 | 1.96E-06 | 2.26E-04 | energy coupled proton transport, down electrochemical gradient |
| <b>GO:0015986</b> | 20  | -0.962 | 1.96E-06 | 2.26E-04 | ATP synthesis coupled proton transport                         |
| <b>GO:1901605</b> | 197 | -0.340 | 2.21E-06 | 2.49E-04 | alpha-amino acid metabolic process                             |
| <b>GO:0042158</b> | 93  | -0.497 | 2.40E-06 | 2.66E-04 | lipoprotein biosynthetic process                               |
| <b>GO:0042407</b> | 29  | -0.800 | 2.73E-06 | 2.96E-04 | cristae formation                                              |
| <b>GO:0001510</b> | 76  | -0.533 | 2.73E-06 | 2.96E-04 | RNA methylation                                                |
| <b>GO:0009063</b> | 122 | -0.423 | 3.18E-06 | 3.39E-04 | cellular amino acid catabolic process                          |
| <b>GO:0033617</b> | 18  | -0.981 | 3.46E-06 | 3.64E-04 | mitochondrial cytochrome c oxidase assembly                    |
| <b>GO:0017004</b> | 30  | -0.826 | 3.86E-06 | 3.98E-04 | cytochrome complex assembly                                    |
| <b>GO:0016054</b> | 268 | -0.285 | 3.90E-06 | 4.00E-04 | organic acid catabolic process                                 |
| <b>GO:0046395</b> | 268 | -0.285 | 3.90E-06 | 4.00E-04 | carboxylic acid catabolic process                              |
| <b>GO:0006497</b> | 88  | -0.490 | 6.23E-06 | 5.99E-04 | protein lipidation                                             |
| <b>GO:0000963</b> | 17  | -1.034 | 6.50E-06 | 6.24E-04 | mitochondrial RNA processing                                   |
| <b>GO:0042776</b> | 19  | -0.938 | 6.99E-06 | 6.62E-04 | mitochondrial ATP synthesis coupled proton transport           |
| <b>GO:0006457</b> | 209 | -0.313 | 7.72E-06 | 7.28E-04 | protein folding                                                |
| <b>GO:0000469</b> | 22  | -0.877 | 8.19E-06 | 7.63E-04 | cleavage involved in rRNA processing                           |
| <b>GO:0016254</b> | 17  | -0.983 | 8.23E-06 | 7.64E-04 | preassembly of GPI anchor in ER membrane                       |

|                   |     |        |          |          |                                                                                           |
|-------------------|-----|--------|----------|----------|-------------------------------------------------------------------------------------------|
| <b>GO:0000387</b> | 38  | -0.705 | 8.85E-06 | 8.11E-04 | spliceosomal snRNP assembly                                                               |
| <b>GO:0016073</b> | 31  | -0.734 | 9.04E-06 | 8.27E-04 | snRNA metabolic process                                                                   |
| <b>GO:0030488</b> | 38  | -0.687 | 9.08E-06 | 8.29E-04 | tRNA methylation                                                                          |
| <b>GO:0008535</b> | 21  | -0.895 | 9.39E-06 | 8.52E-04 | respiratory chain complex IV assembly                                                     |
| <b>GO:0097502</b> | 33  | -0.851 | 1.02E-05 | 9.13E-04 | mannosylation                                                                             |
| <b>GO:0062125</b> | 26  | -0.927 | 1.03E-05 | 9.20E-04 | regulation of mitochondrial gene expression                                               |
| <b>GO:0006743</b> | 17  | -0.976 | 1.32E-05 | 1.15E-03 | ubiquinone metabolic process                                                              |
| <b>GO:0000154</b> | 33  | -0.731 | 1.91E-05 | 1.57E-03 | rRNA modification                                                                         |
| <b>GO:0042157</b> | 121 | -0.390 | 2.07E-05 | 1.70E-03 | lipoprotein metabolic process                                                             |
| <b>GO:0070129</b> | 24  | -0.942 | 2.39E-05 | 1.93E-03 | regulation of mitochondrial translation                                                   |
| <b>GO:0044282</b> | 424 | -0.208 | 2.41E-05 | 1.94E-03 | small molecule catabolic process                                                          |
| <b>GO:0016180</b> | 25  | -0.754 | 3.38E-05 | 2.58E-03 | snRNA processing                                                                          |
| <b>GO:0042273</b> | 67  | -0.496 | 3.63E-05 | 2.73E-03 | ribosomal large subunit biogenesis                                                        |
| <b>GO:0006264</b> | 12  | -1.097 | 3.66E-05 | 2.74E-03 | mitochondrial DNA replication                                                             |
| <b>GO:0006122</b> | 12  | -1.022 | 3.74E-05 | 2.78E-03 | mitochondrial electron transport, ubiquinol to cytochrome c                               |
| <b>GO:0030490</b> | 44  | -0.602 | 3.75E-05 | 2.79E-03 | maturation of SSU-rRNA                                                                    |
| <b>GO:0042274</b> | 63  | -0.507 | 4.12E-05 | 3.01E-03 | ribosomal small subunit biogenesis                                                        |
| <b>GO:0090646</b> | 13  | -1.018 | 4.83E-05 | 3.46E-03 | mitochondrial tRNA processing                                                             |
| <b>GO:0000959</b> | 43  | -0.621 | 4.98E-05 | 3.54E-03 | mitochondrial RNA metabolic process                                                       |
| <b>GO:0090494</b> | 15  | -0.950 | 5.67E-05 | 3.98E-03 | dopamine uptake                                                                           |
| <b>GO:0033013</b> | 56  | -0.529 | 7.54E-05 | 5.07E-03 | tetrapyrrole metabolic process                                                            |
| <b>GO:0009301</b> | 72  | -0.462 | 7.64E-05 | 5.12E-03 | snRNA transcription                                                                       |
| <b>GO:0042795</b> | 71  | -0.465 | 7.78E-05 | 5.18E-03 | snRNA transcription by RNA polymerase II                                                  |
| <b>GO:0090305</b> | 282 | -0.236 | 8.74E-05 | 5.74E-03 | nucleic acid phosphodiester bond hydrolysis                                               |
| <b>GO:0034982</b> | 13  | -1.059 | 8.77E-05 | 5.74E-03 | mitochondrial protein processing                                                          |
| <b>GO:0000466</b> | 22  | -0.792 | 9.17E-05 | 5.96E-03 | maturation of 5.8S rRNA from tricistronic rRNA transcript (SSU-rRNA, 5.8S rRNA, LSU-rRNA) |
| <b>GO:1901606</b> | 103 | -0.381 | 1.13E-04 | 7.15E-03 | alpha-amino acid catabolic process                                                        |
| <b>GO:0006851</b> | 25  | -0.743 | 1.27E-04 | 7.90E-03 | mitochondrial calcium ion transmembrane transport                                         |
| <b>GO:0090501</b> | 141 | -0.325 | 1.35E-04 | 8.32E-03 | RNA phosphodiester bond hydrolysis                                                        |
| <b>GO:0006488</b> | 18  | -0.928 | 1.42E-04 | 8.68E-03 | dolichol-linked oligosaccharide biosynthetic process                                      |
| <b>GO:0098781</b> | 107 | -0.366 | 1.50E-04 | 9.09E-03 | ncRNA transcription                                                                       |
| <b>GO:0043624</b> | 211 | -0.258 | 2.25E-04 | 1.29E-02 | cellular protein complex disassembly                                                      |

|                   |     |        |          |          |                                                                                          |
|-------------------|-----|--------|----------|----------|------------------------------------------------------------------------------------------|
| <b>GO:0006490</b> | 19  | -0.866 | 2.27E-04 | 1.30E-02 | oligosaccharide-lipid intermediate biosynthetic process                                  |
| <b>GO:0036503</b> | 97  | -0.381 | 2.40E-04 | 1.36E-02 | ERAD pathway                                                                             |
| <b>GO:0033014</b> | 30  | -0.686 | 2.52E-04 | 1.42E-02 | tetrapyrrole biosynthetic process                                                        |
| <b>GO:0072321</b> | 11  | -0.980 | 2.61E-04 | 1.46E-02 | chaperone-mediated protein transport                                                     |
| <b>GO:0000462</b> | 34  | -0.595 | 3.21E-04 | 1.74E-02 | maturation of SSU-rRNA from tricistronic rRNA transcript (SSU-rRNA, 5.8S rRNA, LSU-rRNA) |
| <b>GO:0042537</b> | 24  | -0.735 | 3.43E-04 | 1.85E-02 | benzene-containing compound metabolic process                                            |
| <b>GO:1901661</b> | 28  | -0.646 | 3.52E-04 | 1.89E-02 | quinone metabolic process                                                                |
| <b>GO:0007006</b> | 125 | -0.321 | 3.76E-04 | 1.99E-02 | mitochondrial membrane organization                                                      |
| <b>GO:0000460</b> | 27  | -0.670 | 3.93E-04 | 2.07E-02 | maturation of 5.8S rRNA                                                                  |
| <b>GO:0035269</b> | 18  | -0.964 | 4.43E-04 | 2.29E-02 | protein O-linked mannosylation                                                           |
| <b>GO:0006888</b> | 203 | -0.240 | 6.80E-04 | 3.32E-02 | endoplasmic reticulum to Golgi vesicle-mediated transport                                |
| <b>GO:0090502</b> | 70  | -0.411 | 6.83E-04 | 3.33E-02 | RNA phosphodiester bond hydrolysis, endonucleolytic                                      |
| <b>GO:0016074</b> | 13  | -0.849 | 7.86E-04 | 3.75E-02 | snoRNA metabolic process                                                                 |
| <b>GO:0070585</b> | 139 | -0.287 | 8.13E-04 | 3.86E-02 | protein localization to mitochondrion                                                    |
| <b>GO:0046034</b> | 270 | -0.205 | 8.46E-04 | 4.00E-02 | ATP metabolic process                                                                    |
| <b>GO:0035437</b> | 12  | -0.879 | 1.01E-03 | 4.66E-02 | maintenance of protein localization in endoplasmic reticulum                             |
| <b>GO:0042255</b> | 57  | -0.431 | 1.03E-03 | 4.72E-02 | ribosome assembly                                                                        |
| <b>GO:0034976</b> | 274 | -0.200 | 1.07E-03 | 4.87E-02 | response to endoplasmic reticulum stress                                                 |
| <b>GO:0015697</b> | 12  | -0.956 | 1.09E-03 | 4.96E-02 | quaternary ammonium group transport                                                      |
| <b>GO:0042110</b> | 431 | 0.628  | 6.49E-36 | 1.87E-31 | T cell activation                                                                        |
| <b>GO:0002694</b> | 476 | 0.557  | 1.55E-31 | 1.49E-27 | regulation of leukocyte activation                                                       |
| <b>GO:0001525</b> | 481 | 0.540  | 4.36E-31 | 3.60E-27 | angiogenesis                                                                             |
| <b>GO:0050900</b> | 400 | 0.583  | 1.83E-29 | 1.32E-25 | leukocyte migration                                                                      |
| <b>GO:0006909</b> | 256 | 0.736  | 7.84E-29 | 5.03E-25 | phagocytosis                                                                             |
| <b>GO:0051249</b> | 395 | 0.579  | 1.65E-28 | 9.54E-25 | regulation of lymphocyte activation                                                      |
| <b>GO:0045785</b> | 386 | 0.568  | 1.93E-27 | 8.58E-24 | positive regulation of cell adhesion                                                     |
| <b>GO:2000147</b> | 500 | 0.499  | 3.92E-27 | 1.62E-23 | positive regulation of cell motility                                                     |
| <b>GO:0030335</b> | 479 | 0.503  | 1.89E-26 | 7.26E-23 | positive regulation of cell migration                                                    |
| <b>GO:0002521</b> | 488 | 0.496  | 3.23E-26 | 1.17E-22 | leukocyte differentiation                                                                |
| <b>GO:0042060</b> | 462 | 0.502  | 5.27E-26 | 1.79E-22 | wound healing                                                                            |
| <b>GO:0002764</b> | 353 | 0.569  | 8.01E-25 | 2.57E-21 | immune response-regulating signaling pathway                                             |

|                   |     |       |          |          |                                                                                             |
|-------------------|-----|-------|----------|----------|---------------------------------------------------------------------------------------------|
| <b>GO:0002768</b> | 351 | 0.570 | 8.64E-25 | 2.63E-21 | immune response-regulating cell surface receptor signaling pathway                          |
| <b>GO:0007159</b> | 313 | 0.605 | 1.13E-24 | 3.27E-21 | leukocyte cell-cell adhesion                                                                |
| <b>GO:0043299</b> | 493 | 0.478 | 1.34E-24 | 3.69E-21 | leukocyte degranulation                                                                     |
| <b>GO:0050863</b> | 296 | 0.610 | 2.35E-24 | 6.18E-21 | regulation of T cell activation                                                             |
| <b>GO:0050867</b> | 306 | 0.597 | 6.12E-24 | 1.54E-20 | positive regulation of cell activation                                                      |
| <b>GO:0031589</b> | 338 | 0.551 | 2.24E-23 | 5.40E-20 | cell-substrate adhesion                                                                     |
| <b>GO:0002250</b> | 352 | 0.547 | 2.77E-23 | 6.15E-20 | adaptive immune response                                                                    |
| <b>GO:0002696</b> | 297 | 0.597 | 2.73E-23 | 6.15E-20 | positive regulation of leukocyte activation                                                 |
| <b>GO:0070661</b> | 271 | 0.619 | 3.17E-23 | 6.78E-20 | leukocyte proliferation                                                                     |
| <b>GO:0038094</b> | 82  | 1.056 | 5.35E-23 | 1.10E-19 | Fc-gamma receptor signaling pathway                                                         |
| <b>GO:1903037</b> | 280 | 0.611 | 6.09E-23 | 1.21E-19 | regulation of leukocyte cell-cell adhesion                                                  |
| <b>GO:0022407</b> | 375 | 0.517 | 2.15E-22 | 3.59E-19 | regulation of cell-cell adhesion                                                            |
| <b>GO:0001819</b> | 356 | 0.534 | 2.07E-22 | 3.59E-19 | positive regulation of cytokine production                                                  |
| <b>GO:0002429</b> | 323 | 0.563 | 2.24E-22 | 3.59E-19 | immune response-activating cell surface receptor signaling pathway                          |
| <b>GO:0002757</b> | 323 | 0.563 | 2.24E-22 | 3.59E-19 | immune response-activating signal transduction                                              |
| <b>GO:0043087</b> | 436 | 0.476 | 3.81E-22 | 5.95E-19 | regulation of GTPase activity                                                               |
| <b>GO:0002431</b> | 84  | 1.039 | 4.55E-22 | 6.91E-19 | Fc receptor mediated stimulatory signaling pathway                                          |
| <b>GO:0030098</b> | 332 | 0.540 | 7.20E-22 | 1.07E-18 | lymphocyte differentiation                                                                  |
| <b>GO:1901342</b> | 310 | 0.558 | 7.81E-22 | 1.13E-18 | regulation of vasculature development                                                       |
| <b>GO:0002433</b> | 78  | 1.059 | 8.46E-22 | 1.16E-18 | immune response-regulating cell surface receptor signaling pathway involved in phagocytosis |
| <b>GO:0038096</b> | 78  | 1.059 | 8.46E-22 | 1.16E-18 | Fc-gamma receptor signaling pathway involved in phagocytosis                                |
| <b>GO:0051251</b> | 254 | 0.622 | 1.10E-21 | 1.48E-18 | positive regulation of lymphocyte activation                                                |
| <b>GO:0032943</b> | 250 | 0.620 | 1.57E-21 | 2.06E-18 | mononuclear cell proliferation                                                              |
| <b>GO:0042119</b> | 458 | 0.460 | 1.64E-21 | 2.10E-18 | neutrophil activation                                                                       |
| <b>GO:0043547</b> | 364 | 0.510 | 3.07E-21 | 3.86E-18 | positive regulation of GTPase activity                                                      |
| <b>GO:0036230</b> | 464 | 0.449 | 6.56E-21 | 7.90E-18 | granulocyte activation                                                                      |
| <b>GO:1903039</b> | 205 | 0.678 | 6.95E-21 | 8.20E-18 | positive regulation of leukocyte cell-cell adhesion                                         |
| <b>GO:0046651</b> | 248 | 0.610 | 8.00E-21 | 9.25E-18 | lymphocyte proliferation                                                                    |
| <b>GO:0043312</b> | 447 | 0.456 | 9.09E-21 | 1.03E-17 | neutrophil degranulation                                                                    |
| <b>GO:0002283</b> | 449 | 0.454 | 1.16E-20 | 1.28E-17 | neutrophil activation involved in immune response                                           |

|                   |     |       |          |          |                                                         |
|-------------------|-----|-------|----------|----------|---------------------------------------------------------|
| <b>GO:0002446</b> | 460 | 0.444 | 2.96E-20 | 3.23E-17 | neutrophil mediated immunity                            |
| <b>GO:0045765</b> | 280 | 0.561 | 3.50E-20 | 3.75E-17 | regulation of angiogenesis                              |
| <b>GO:0022604</b> | 477 | 0.430 | 4.68E-20 | 4.91E-17 | regulation of cell morphogenesis                        |
| <b>GO:0022409</b> | 241 | 0.604 | 7.01E-20 | 7.23E-17 | positive regulation of cell-cell adhesion               |
| <b>GO:0002253</b> | 402 | 0.471 | 7.64E-20 | 7.75E-17 | activation of immune response                           |
| <b>GO:0032970</b> | 360 | 0.493 | 1.07E-19 | 1.07E-16 | regulation of actin filament-based process              |
| <b>GO:0070663</b> | 207 | 0.656 | 1.13E-19 | 1.11E-16 | regulation of leukocyte proliferation                   |
| <b>GO:0051056</b> | 333 | 0.508 | 1.78E-19 | 1.71E-16 | regulation of small GTPase mediated signal transduction |
| <b>GO:0007265</b> | 433 | 0.446 | 2.04E-19 | 1.93E-16 | Ras protein signal transduction                         |
| <b>GO:0030198</b> | 354 | 0.488 | 2.73E-19 | 2.51E-16 | extracellular matrix organization                       |
| <b>GO:0043062</b> | 355 | 0.486 | 3.23E-19 | 2.91E-16 | extracellular structure organization                    |
| <b>GO:0032103</b> | 469 | 0.423 | 4.60E-19 | 4.09E-16 | positive regulation of response to external stimulus    |
| <b>GO:0007162</b> | 255 | 0.568 | 5.16E-19 | 4.52E-16 | negative regulation of cell adhesion                    |
| <b>GO:0007015</b> | 378 | 0.468 | 9.14E-19 | 7.88E-16 | actin filament organization                             |
| <b>GO:0032956</b> | 317 | 0.509 | 1.17E-18 | 9.98E-16 | regulation of actin cytoskeleton organization           |
| <b>GO:0032944</b> | 197 | 0.648 | 2.19E-18 | 1.83E-15 | regulation of mononuclear cell proliferation            |
| <b>GO:0001667</b> | 381 | 0.456 | 2.51E-18 | 2.07E-15 | ameboidal-type cell migration                           |
| <b>GO:0007160</b> | 216 | 0.593 | 3.77E-18 | 3.06E-15 | cell-matrix adhesion                                    |
| <b>GO:0050870</b> | 191 | 0.648 | 4.05E-18 | 3.25E-15 | positive regulation of T cell activation                |
| <b>GO:0050878</b> | 463 | 0.411 | 5.44E-18 | 4.31E-15 | regulation of body fluid levels                         |
| <b>GO:0050670</b> | 196 | 0.641 | 5.62E-18 | 4.39E-15 | regulation of lymphocyte proliferation                  |
| <b>GO:0002683</b> | 376 | 0.445 | 3.13E-17 | 2.41E-14 | negative regulation of immune system process            |
| <b>GO:0008360</b> | 148 | 0.705 | 3.47E-17 | 2.64E-14 | regulation of cell shape                                |
| <b>GO:0050817</b> | 310 | 0.486 | 4.60E-17 | 3.41E-14 | coagulation                                             |
| <b>GO:0090066</b> | 479 | 0.392 | 5.11E-17 | 3.74E-14 | regulation of anatomical structure size                 |
| <b>GO:0002697</b> | 351 | 0.460 | 7.35E-17 | 5.31E-14 | regulation of immune effector process                   |
| <b>GO:0007599</b> | 311 | 0.480 | 9.46E-17 | 6.66E-14 | hemostasis                                              |
| <b>GO:0010631</b> | 274 | 0.508 | 1.37E-16 | 9.56E-14 | epithelial cell migration                               |
| <b>GO:0090130</b> | 283 | 0.498 | 1.67E-16 | 1.15E-13 | tissue migration                                        |
| <b>GO:0030099</b> | 383 | 0.433 | 1.98E-16 | 1.35E-13 | myeloid cell differentiation                            |
| <b>GO:0030217</b> | 231 | 0.552 | 2.10E-16 | 1.41E-13 | T cell differentiation                                  |
| <b>GO:0007596</b> | 306 | 0.477 | 2.48E-16 | 1.65E-13 | blood coagulation                                       |
| <b>GO:0090132</b> | 277 | 0.501 | 2.51E-16 | 1.65E-13 | epithelium migration                                    |

|                   |     |       |          |          |                                                                 |
|-------------------|-----|-------|----------|----------|-----------------------------------------------------------------|
| <b>GO:0071346</b> | 146 | 0.690 | 6.70E-16 | 4.30E-13 | cellular response to interferon-gamma                           |
| <b>GO:0034341</b> | 163 | 0.653 | 7.25E-16 | 4.60E-13 | response to interferon-gamma                                    |
| <b>GO:0009615</b> | 282 | 0.488 | 1.10E-15 | 6.89E-13 | response to virus                                               |
| <b>GO:0032535</b> | 354 | 0.434 | 1.31E-15 | 8.11E-13 | regulation of cellular component size                           |
| <b>GO:0071900</b> | 492 | 0.369 | 1.57E-15 | 9.67E-13 | regulation of protein serine/threonine kinase activity          |
| <b>GO:0060326</b> | 268 | 0.492 | 2.18E-15 | 1.33E-12 | cell chemotaxis                                                 |
| <b>GO:0050673</b> | 379 | 0.412 | 2.24E-15 | 1.35E-12 | epithelial cell proliferation                                   |
| <b>GO:0042098</b> | 173 | 0.615 | 2.29E-15 | 1.36E-12 | T cell proliferation                                            |
| <b>GO:0010810</b> | 204 | 0.556 | 2.89E-15 | 1.70E-12 | regulation of cell-substrate adhesion                           |
| <b>GO:0038093</b> | 179 | 0.605 | 4.72E-15 | 2.75E-12 | Fc receptor signaling pathway                                   |
| <b>GO:0071902</b> | 327 | 0.442 | 4.99E-15 | 2.88E-12 | positive regulation of protein serine/threonine kinase activity |
| <b>GO:0018212</b> | 351 | 0.424 | 5.52E-15 | 3.16E-12 | peptidyl-tyrosine modification                                  |
| <b>GO:0018108</b> | 348 | 0.421 | 1.13E-14 | 6.38E-12 | peptidyl-tyrosine phosphorylation                               |
| <b>GO:0043406</b> | 254 | 0.489 | 1.60E-14 | 8.90E-12 | positive regulation of MAP kinase activity                      |
| <b>GO:0002831</b> | 354 | 0.418 | 1.86E-14 | 1.01E-11 | regulation of response to biotic stimulus                       |
| <b>GO:1902903</b> | 323 | 0.436 | 2.04E-14 | 1.10E-11 | regulation of supramolecular fiber organization                 |
| <b>GO:0030168</b> | 149 | 0.639 | 2.07E-14 | 1.11E-11 | platelet activation                                             |
| <b>GO:0002221</b> | 185 | 0.586 | 2.47E-14 | 1.31E-11 | pattern recognition receptor signaling pathway                  |
| <b>GO:0051271</b> | 295 | 0.445 | 3.69E-14 | 1.92E-11 | negative regulation of cellular component movement              |
| <b>GO:0034329</b> | 395 | 0.387 | 3.87E-14 | 2.00E-11 | cell junction assembly                                          |
| <b>GO:0070665</b> | 132 | 0.693 | 4.52E-14 | 2.31E-11 | positive regulation of leukocyte proliferation                  |
| <b>GO:0031349</b> | 338 | 0.420 | 4.57E-14 | 2.32E-11 | positive regulation of defense response                         |
| <b>GO:0110053</b> | 240 | 0.496 | 7.23E-14 | 3.64E-11 | regulation of actin filament organization                       |
| <b>GO:0051607</b> | 202 | 0.537 | 9.10E-14 | 4.49E-11 | defense response to virus                                       |
| <b>GO:0040013</b> | 293 | 0.438 | 9.57E-14 | 4.69E-11 | negative regulation of locomotion                               |
| <b>GO:0007409</b> | 462 | 0.351 | 1.31E-13 | 6.36E-11 | axonogenesis                                                    |
| <b>GO:0043405</b> | 329 | 0.412 | 2.33E-13 | 1.11E-10 | regulation of MAP kinase activity                               |
| <b>GO:0010632</b> | 216 | 0.504 | 2.50E-13 | 1.18E-10 | regulation of epithelial cell migration                         |
| <b>GO:0042129</b> | 145 | 0.620 | 3.96E-13 | 1.85E-10 | regulation of T cell proliferation                              |
| <b>GO:0042113</b> | 224 | 0.496 | 4.36E-13 | 1.99E-10 | B cell activation                                               |
| <b>GO:0046631</b> | 134 | 0.626 | 4.35E-13 | 1.99E-10 | alpha-beta T cell activation                                    |
| <b>GO:0032946</b> | 127 | 0.678 | 4.31E-13 | 1.99E-10 | positive regulation of mononuclear cell proliferation           |

|                   |     |       |          |          |                                                                                                                           |
|-------------------|-----|-------|----------|----------|---------------------------------------------------------------------------------------------------------------------------|
| <b>GO:0046777</b> | 236 | 0.474 | 4.55E-13 | 2.05E-10 | protein autophosphorylation                                                                                               |
| <b>GO:1903706</b> | 438 | 0.352 | 5.09E-13 | 2.26E-10 | regulation of hemopoiesis                                                                                                 |
| <b>GO:0050853</b> | 56  | 0.976 | 5.06E-13 | 2.26E-10 | B cell receptor signaling pathway                                                                                         |
| <b>GO:1904018</b> | 180 | 0.541 | 9.91E-13 | 4.37E-10 | positive regulation of vasculature development                                                                            |
| <b>GO:0002703</b> | 180 | 0.542 | 1.07E-12 | 4.68E-10 | regulation of leukocyte mediated immunity                                                                                 |
| <b>GO:0050671</b> | 126 | 0.667 | 1.08E-12 | 4.68E-10 | positive regulation of lymphocyte proliferation                                                                           |
| <b>GO:0099024</b> | 58  | 0.908 | 1.16E-12 | 4.98E-10 | plasma membrane invagination                                                                                              |
| <b>GO:0050678</b> | 324 | 0.399 | 1.21E-12 | 5.14E-10 | regulation of epithelial cell proliferation                                                                               |
| <b>GO:0008154</b> | 192 | 0.521 | 2.10E-12 | 8.85E-10 | actin polymerization or depolymerization                                                                                  |
| <b>GO:0045766</b> | 161 | 0.563 | 2.16E-12 | 8.99E-10 | positive regulation of angiogenesis                                                                                       |
| <b>GO:0048017</b> | 176 | 0.532 | 2.84E-12 | 1.16E-09 | inositol lipid-mediated signaling                                                                                         |
| <b>GO:0001952</b> | 113 | 0.651 | 2.87E-12 | 1.17E-09 | regulation of cell-matrix adhesion                                                                                        |
| <b>GO:1902105</b> | 260 | 0.439 | 4.16E-12 | 1.68E-09 | regulation of leukocyte differentiation                                                                                   |
| <b>GO:2000146</b> | 262 | 0.429 | 5.01E-12 | 2.01E-09 | negative regulation of cell motility                                                                                      |
| <b>GO:0030595</b> | 196 | 0.497 | 5.63E-12 | 2.24E-09 | leukocyte chemotaxis                                                                                                      |
| <b>GO:0050866</b> | 181 | 0.524 | 5.91E-12 | 2.34E-09 | negative regulation of cell activation                                                                                    |
| <b>GO:0002460</b> | 235 | 0.461 | 5.97E-12 | 2.35E-09 | adaptive immune response based on somatic recombination of immune receptors built from immunoglobulin superfamily domains |
| <b>GO:0043542</b> | 197 | 0.497 | 6.07E-12 | 2.37E-09 | endothelial cell migration                                                                                                |
| <b>GO:0032147</b> | 324 | 0.387 | 6.79E-12 | 2.62E-09 | activation of protein kinase activity                                                                                     |
| <b>GO:0048015</b> | 173 | 0.527 | 6.79E-12 | 2.62E-09 | phosphatidylinositol-mediated signaling                                                                                   |
| <b>GO:1901653</b> | 369 | 0.362 | 8.20E-12 | 3.14E-09 | cellular response to peptide                                                                                              |
| <b>GO:1901343</b> | 114 | 0.634 | 8.89E-12 | 3.38E-09 | negative regulation of vasculature development                                                                            |
| <b>GO:0031341</b> | 80  | 0.748 | 1.07E-11 | 4.03E-09 | regulation of cell killing                                                                                                |
| <b>GO:0030336</b> | 251 | 0.430 | 1.15E-11 | 4.31E-09 | negative regulation of cell migration                                                                                     |
| <b>GO:0010634</b> | 139 | 0.576 | 1.55E-11 | 5.77E-09 | positive regulation of epithelial cell migration                                                                          |
| <b>GO:0045088</b> | 270 | 0.420 | 1.69E-11 | 6.25E-09 | regulation of innate immune response                                                                                      |
| <b>GO:0043254</b> | 404 | 0.341 | 2.06E-11 | 7.54E-09 | regulation of protein-containing complex assembly                                                                         |
| <b>GO:0002224</b> | 138 | 0.598 | 2.06E-11 | 7.54E-09 | toll-like receptor signaling pathway                                                                                      |



|                   |     |       |          |          |                                                               |
|-------------------|-----|-------|----------|----------|---------------------------------------------------------------|
| <b>GO:0032612</b> | 43  | 0.953 | 2.26E-11 | 8.17E-09 | interleukin-1 production                                      |
| <b>GO:0002237</b> | 318 | 0.383 | 2.41E-11 | 8.65E-09 | response to molecule of bacterial origin                      |
| <b>GO:0002685</b> | 185 | 0.499 | 2.58E-11 | 9.21E-09 | regulation of leukocyte migration                             |
| <b>GO:0048010</b> | 92  | 0.705 | 2.65E-11 | 9.39E-09 | vascular endothelial growth factor receptor signaling pathway |
| <b>GO:0031295</b> | 55  | 0.861 | 2.80E-11 | 9.87E-09 | T cell costimulation                                          |
| <b>GO:0002695</b> | 160 | 0.536 | 3.10E-11 | 1.09E-08 | negative regulation of leukocyte activation                   |
| <b>GO:0019932</b> | 416 | 0.330 | 3.15E-11 | 1.09E-08 | second-messenger-mediated signaling                           |
| <b>GO:0097529</b> | 184 | 0.494 | 3.29E-11 | 1.14E-08 | myeloid leukocyte migration                                   |
| <b>GO:0050769</b> | 464 | 0.312 | 3.61E-11 | 1.24E-08 | positive regulation of neurogenesis                           |
| <b>GO:0031334</b> | 234 | 0.440 | 4.03E-11 | 1.38E-08 | positive regulation of protein-containing complex assembly    |
| <b>GO:0046578</b> | 234 | 0.438 | 4.47E-11 | 1.51E-08 | regulation of Ras protein signal transduction                 |
| <b>GO:0006911</b> | 49  | 0.915 | 4.48E-11 | 1.51E-08 | phagocytosis, engulfment                                      |
| <b>GO:0050920</b> | 202 | 0.466 | 5.42E-11 | 1.79E-08 | regulation of chemotaxis                                      |
| <b>GO:0007229</b> | 106 | 0.662 | 5.43E-11 | 1.79E-08 | integrin-mediated signaling pathway                           |
| <b>GO:0050729</b> | 135 | 0.565 | 7.44E-11 | 2.43E-08 | positive regulation of inflammatory response                  |
| <b>GO:0046634</b> | 89  | 0.681 | 8.70E-11 | 2.82E-08 | regulation of alpha-beta T cell activation                    |
| <b>GO:0050854</b> | 60  | 0.819 | 8.76E-11 | 2.83E-08 | regulation of antigen receptor-mediated signaling pathway     |
| <b>GO:0032496</b> | 307 | 0.378 | 9.26E-11 | 2.97E-08 | response to lipopolysaccharide                                |
| <b>GO:0001776</b> | 84  | 0.734 | 1.03E-10 | 3.28E-08 | leukocyte homeostasis                                         |
| <b>GO:0002285</b> | 161 | 0.519 | 1.12E-10 | 3.54E-08 | lymphocyte activation involved in immune response             |
| <b>GO:0002699</b> | 188 | 0.485 | 1.13E-10 | 3.56E-08 | positive regulation of immune effector process                |
| <b>GO:2000181</b> | 103 | 0.628 | 1.13E-10 | 3.56E-08 | negative regulation of blood vessel morphogenesis             |
| <b>GO:0010975</b> | 487 | 0.297 | 1.24E-10 | 3.88E-08 | regulation of neuron projection development                   |
| <b>GO:0031294</b> | 56  | 0.831 | 1.33E-10 | 4.14E-08 | lymphocyte costimulation                                      |
| <b>GO:0008064</b> | 163 | 0.515 | 1.49E-10 | 4.61E-08 | regulation of actin polymerization or depolymerization        |
| <b>GO:0050727</b> | 317 | 0.366 | 1.56E-10 | 4.77E-08 | regulation of inflammatory response                           |
| <b>GO:0002573</b> | 197 | 0.465 | 1.58E-10 | 4.82E-08 | myeloid leukocyte differentiation                             |
| <b>GO:0046632</b> | 100 | 0.637 | 1.60E-10 | 4.86E-08 | alpha-beta T cell differentiation                             |
| <b>GO:0007266</b> | 198 | 0.460 | 1.69E-10 | 5.10E-08 | Rho protein signal transduction                               |
| <b>GO:0051983</b> | 98  | 0.667 | 1.81E-10 | 5.42E-08 | regulation of chromosome segregation                          |

|                   |     |       |          |          |                                                            |
|-------------------|-----|-------|----------|----------|------------------------------------------------------------|
| <b>GO:0031098</b> | 302 | 0.372 | 1.96E-10 | 5.83E-08 | stress-activated protein kinase signaling cascade          |
| <b>GO:0030832</b> | 164 | 0.510 | 1.98E-10 | 5.87E-08 | regulation of actin filament length                        |
| <b>GO:2000106</b> | 78  | 0.755 | 2.03E-10 | 6.00E-08 | regulation of leukocyte apoptotic process                  |
| <b>GO:0002449</b> | 223 | 0.433 | 2.12E-10 | 6.20E-08 | lymphocyte mediated immunity                               |
| <b>GO:0001935</b> | 140 | 0.536 | 2.12E-10 | 6.20E-08 | endothelial cell proliferation                             |
| <b>GO:0007163</b> | 210 | 0.444 | 2.44E-10 | 7.09E-08 | establishment or maintenance of cell polarity              |
| <b>GO:0097305</b> | 233 | 0.420 | 2.50E-10 | 7.23E-08 | response to alcohol                                        |
| <b>GO:0007249</b> | 253 | 0.405 | 2.54E-10 | 7.31E-08 | I-kappaB kinase/NF-kappaB signaling                        |
| <b>GO:0030900</b> | 381 | 0.328 | 2.57E-10 | 7.35E-08 | forebrain development                                      |
| <b>GO:0045123</b> | 61  | 0.789 | 2.91E-10 | 8.28E-08 | cellular extravasation                                     |
| <b>GO:0030041</b> | 165 | 0.502 | 2.96E-10 | 8.40E-08 | actin filament polymerization                              |
| <b>GO:0051480</b> | 345 | 0.343 | 3.05E-10 | 8.60E-08 | regulation of cytosolic calcium ion concentration          |
| <b>GO:0050679</b> | 185 | 0.466 | 3.08E-10 | 8.63E-08 | positive regulation of epithelial cell proliferation       |
| <b>GO:0140014</b> | 264 | 0.395 | 3.10E-10 | 8.65E-08 | mitotic nuclear division                                   |
| <b>GO:0010324</b> | 66  | 0.770 | 3.14E-10 | 8.72E-08 | membrane invagination                                      |
| <b>GO:0050851</b> | 218 | 0.436 | 3.30E-10 | 9.14E-08 | antigen receptor-mediated signaling pathway                |
| <b>GO:0016525</b> | 101 | 0.618 | 3.33E-10 | 9.18E-08 | negative regulation of angiogenesis                        |
| <b>GO:0000082</b> | 240 | 0.412 | 3.54E-10 | 9.69E-08 | G1/S transition of mitotic cell cycle                      |
| <b>GO:0071496</b> | 300 | 0.368 | 3.85E-10 | 1.05E-07 | cellular response to external stimulus                     |
| <b>GO:0001906</b> | 128 | 0.559 | 4.16E-10 | 1.13E-07 | cell killing                                               |
| <b>GO:0070371</b> | 284 | 0.378 | 4.18E-10 | 1.13E-07 | ERK1 and ERK2 cascade                                      |
| <b>GO:0032271</b> | 198 | 0.454 | 4.68E-10 | 1.26E-07 | regulation of protein polymerization                       |
| <b>GO:0050730</b> | 240 | 0.407 | 5.19E-10 | 1.39E-07 | regulation of peptidyl-tyrosine phosphorylation            |
| <b>GO:0048872</b> | 245 | 0.404 | 5.39E-10 | 1.43E-07 | homeostasis of number of cells                             |
| <b>GO:0032611</b> | 35  | 0.961 | 5.47E-10 | 1.45E-07 | interleukin-1 beta production                              |
| <b>GO:0007204</b> | 308 | 0.357 | 6.30E-10 | 1.66E-07 | positive regulation of cytosolic calcium ion concentration |
| <b>GO:0033002</b> | 187 | 0.461 | 6.51E-10 | 1.71E-07 | muscle cell proliferation                                  |
| <b>GO:0030833</b> | 146 | 0.526 | 6.75E-10 | 1.77E-07 | regulation of actin filament polymerization                |
| <b>GO:0032652</b> | 39  | 0.933 | 6.86E-10 | 1.79E-07 | regulation of interleukin-1 production                     |
| <b>GO:0000910</b> | 160 | 0.500 | 7.05E-10 | 1.83E-07 | cytokinesis                                                |
| <b>GO:0071559</b> | 236 | 0.405 | 7.32E-10 | 1.89E-07 | response to transforming growth factor beta                |

|                   |     |       |          |          |                                                                 |
|-------------------|-----|-------|----------|----------|-----------------------------------------------------------------|
| <b>GO:0071260</b> | 75  | 0.729 | 7.69E-10 | 1.98E-07 | cellular response to mechanical stimulus                        |
| <b>GO:0007059</b> | 301 | 0.362 | 7.85E-10 | 2.01E-07 | chromosome segregation                                          |
| <b>GO:0071887</b> | 99  | 0.638 | 8.09E-10 | 2.06E-07 | leukocyte apoptotic process                                     |
| <b>GO:0051051</b> | 421 | 0.304 | 8.99E-10 | 2.27E-07 | negative regulation of transport                                |
| <b>GO:0042102</b> | 90  | 0.672 | 9.13E-10 | 2.30E-07 | positive regulation of T cell proliferation                     |
| <b>GO:0001910</b> | 61  | 0.763 | 1.09E-09 | 2.71E-07 | regulation of leukocyte mediated cytotoxicity                   |
| <b>GO:0045619</b> | 160 | 0.491 | 1.10E-09 | 2.74E-07 | regulation of lymphocyte differentiation                        |
| <b>GO:0010594</b> | 155 | 0.494 | 1.11E-09 | 2.74E-07 | regulation of endothelial cell migration                        |
| <b>GO:0070302</b> | 226 | 0.412 | 1.18E-09 | 2.90E-07 | regulation of stress-activated protein kinase signaling cascade |
| <b>GO:0019882</b> | 195 | 0.445 | 1.23E-09 | 3.02E-07 | antigen processing and presentation                             |
| <b>GO:0043122</b> | 222 | 0.413 | 1.27E-09 | 3.10E-07 | regulation of I-kappaB kinase/NF-kappaB signaling               |
| <b>GO:0060348</b> | 215 | 0.418 | 1.31E-09 | 3.17E-07 | bone development                                                |
| <b>GO:0071375</b> | 312 | 0.348 | 1.31E-09 | 3.18E-07 | cellular response to peptide hormone stimulus                   |
| <b>GO:0051235</b> | 298 | 0.356 | 1.52E-09 | 3.65E-07 | maintenance of location                                         |
| <b>GO:0031343</b> | 54  | 0.817 | 1.78E-09 | 4.24E-07 | positive regulation of cell killing                             |
| <b>GO:0072678</b> | 60  | 0.803 | 1.80E-09 | 4.29E-07 | T cell migration                                                |
| <b>GO:0007044</b> | 98  | 0.604 | 1.88E-09 | 4.44E-07 | cell-substrate junction assembly                                |
| <b>GO:0150115</b> | 98  | 0.604 | 1.88E-09 | 4.44E-07 | cell-substrate junction organization                            |
| <b>GO:0010769</b> | 299 | 0.349 | 2.47E-09 | 5.81E-07 | regulation of cell morphogenesis involved in differentiation    |
| <b>GO:0032273</b> | 125 | 0.541 | 2.51E-09 | 5.86E-07 | positive regulation of protein polymerization                   |
| <b>GO:0019058</b> | 299 | 0.349 | 2.78E-09 | 6.47E-07 | viral life cycle                                                |
| <b>GO:0045637</b> | 221 | 0.407 | 2.95E-09 | 6.84E-07 | regulation of myeloid cell differentiation                      |
| <b>GO:0022408</b> | 161 | 0.472 | 3.31E-09 | 7.66E-07 | negative regulation of cell-cell adhesion                       |
| <b>GO:0044843</b> | 254 | 0.377 | 3.40E-09 | 7.82E-07 | cell cycle G1/S phase transition                                |
| <b>GO:0150076</b> | 63  | 0.745 | 3.41E-09 | 7.82E-07 | neuroinflammatory response                                      |
| <b>GO:0009612</b> | 209 | 0.417 | 3.45E-09 | 7.89E-07 | response to mechanical stimulus                                 |
| <b>GO:0060560</b> | 231 | 0.393 | 3.48E-09 | 7.93E-07 | developmental growth involved in morphogenesis                  |
| <b>GO:0051250</b> | 132 | 0.524 | 3.89E-09 | 8.82E-07 | negative regulation of lymphocyte activation                    |
| <b>GO:0043434</b> | 426 | 0.290 | 3.94E-09 | 8.89E-07 | response to peptide hormone                                     |
| <b>GO:0032872</b> | 224 | 0.399 | 4.03E-09 | 9.05E-07 | regulation of stress-activated MAPK cascade                     |
| <b>GO:0006874</b> | 440 | 0.285 | 4.19E-09 | 9.37E-07 | cellular calcium ion homeostasis                                |

|                   |     |       |          |          |                                                               |
|-------------------|-----|-------|----------|----------|---------------------------------------------------------------|
| <b>GO:0001936</b> | 124 | 0.526 | 4.20E-09 | 9.37E-07 | regulation of endothelial cell proliferation                  |
| <b>GO:0002706</b> | 128 | 0.528 | 4.23E-09 | 9.40E-07 | regulation of lymphocyte mediated immunity                    |
| <b>GO:0008361</b> | 177 | 0.444 | 4.41E-09 | 9.76E-07 | regulation of cell size                                       |
| <b>GO:0050764</b> | 91  | 0.639 | 4.54E-09 | 1.00E-06 | regulation of phagocytosis                                    |
| <b>GO:0070372</b> | 268 | 0.364 | 4.74E-09 | 1.04E-06 | regulation of ERK1 and ERK2 cascade                           |
| <b>GO:0006898</b> | 243 | 0.378 | 4.92E-09 | 1.08E-06 | receptor-mediated endocytosis                                 |
| <b>GO:0030888</b> | 61  | 0.790 | 5.09E-09 | 1.11E-06 | regulation of B cell proliferation                            |
| <b>GO:0002819</b> | 144 | 0.498 | 5.13E-09 | 1.12E-06 | regulation of adaptive immune response                        |
| <b>GO:0060485</b> | 263 | 0.362 | 6.13E-09 | 1.33E-06 | mesenchyme development                                        |
| <b>GO:0043123</b> | 176 | 0.444 | 6.73E-09 | 1.45E-06 | positive regulation of I-kappaB kinase/NF-kappaB signaling    |
| <b>GO:0014065</b> | 142 | 0.490 | 6.82E-09 | 1.46E-06 | phosphatidylinositol 3-kinase signaling                       |
| <b>GO:0072676</b> | 94  | 0.616 | 6.96E-09 | 1.49E-06 | lymphocyte migration                                          |
| <b>GO:0000819</b> | 176 | 0.446 | 7.03E-09 | 1.49E-06 | sister chromatid segregation                                  |
| <b>GO:0061572</b> | 150 | 0.478 | 7.12E-09 | 1.50E-06 | actin filament bundle organization                            |
| <b>GO:0042100</b> | 82  | 0.653 | 7.11E-09 | 1.50E-06 | B cell proliferation                                          |
| <b>GO:0055074</b> | 452 | 0.277 | 7.20E-09 | 1.51E-06 | calcium ion homeostasis                                       |
| <b>GO:0071560</b> | 230 | 0.385 | 7.31E-09 | 1.53E-06 | cellular response to transforming growth factor beta stimulus |
| <b>GO:0097530</b> | 125 | 0.520 | 8.26E-09 | 1.72E-06 | granulocyte migration                                         |
| <b>GO:0051403</b> | 274 | 0.353 | 8.44E-09 | 1.75E-06 | stress-activated MAPK cascade                                 |
| <b>GO:0048608</b> | 425 | 0.283 | 8.76E-09 | 1.81E-06 | reproductive structure development                            |
| <b>GO:0003012</b> | 432 | 0.281 | 8.88E-09 | 1.83E-06 | muscle system process                                         |
| <b>GO:0060333</b> | 65  | 0.720 | 9.39E-09 | 1.92E-06 | interferon-gamma-mediated signaling pathway                   |
| <b>GO:0050868</b> | 101 | 0.577 | 1.02E-08 | 2.09E-06 | negative regulation of T cell activation                      |
| <b>GO:0031532</b> | 99  | 0.578 | 1.03E-08 | 2.10E-06 | actin cytoskeleton reorganization                             |
| <b>GO:0045580</b> | 131 | 0.506 | 1.11E-08 | 2.26E-06 | regulation of T cell differentiation                          |
| <b>GO:0048771</b> | 161 | 0.455 | 1.12E-08 | 2.26E-06 | tissue remodeling                                             |
| <b>GO:0045931</b> | 149 | 0.477 | 1.14E-08 | 2.29E-06 | positive regulation of mitotic cell cycle                     |
| <b>GO:0002228</b> | 51  | 0.761 | 1.16E-08 | 2.34E-06 | natural killer cell mediated immunity                         |
| <b>GO:0031346</b> | 373 | 0.298 | 1.27E-08 | 2.54E-06 | positive regulation of cell projection organization           |
| <b>GO:0043491</b> | 239 | 0.374 | 1.37E-08 | 2.72E-06 | protein kinase B signaling                                    |
| <b>GO:0042116</b> | 88  | 0.602 | 1.39E-08 | 2.75E-06 | macrophage activation                                         |
| <b>GO:0048041</b> | 82  | 0.619 | 1.45E-08 | 2.88E-06 | focal adhesion assembly                                       |

|                   |     |       |          |          |                                                          |
|-------------------|-----|-------|----------|----------|----------------------------------------------------------|
| <b>GO:1901888</b> | 191 | 0.413 | 1.48E-08 | 2.92E-06 | regulation of cell junction assembly                     |
| <b>GO:0034765</b> | 462 | 0.267 | 1.53E-08 | 3.00E-06 | regulation of ion transmembrane transport                |
| <b>GO:0038083</b> | 37  | 0.844 | 1.55E-08 | 3.03E-06 | peptidyl-tyrosine autophosphorylation                    |
| <b>GO:0051090</b> | 405 | 0.285 | 1.68E-08 | 3.28E-06 | regulation of DNA-binding transcription factor activity  |
| <b>GO:0048638</b> | 327 | 0.316 | 1.70E-08 | 3.31E-06 | regulation of developmental growth                       |
| <b>GO:0001818</b> | 209 | 0.396 | 1.71E-08 | 3.31E-06 | negative regulation of cytokine production               |
| <b>GO:0032651</b> | 31  | 0.938 | 1.90E-08 | 3.66E-06 | regulation of interleukin-1 beta production              |
| <b>GO:0002833</b> | 221 | 0.385 | 1.96E-08 | 3.74E-06 | positive regulation of response to biotic stimulus       |
| <b>GO:0002286</b> | 89  | 0.599 | 2.05E-08 | 3.91E-06 | T cell activation involved in immune response            |
| <b>GO:0050864</b> | 113 | 0.549 | 2.12E-08 | 4.03E-06 | regulation of B cell activation                          |
| <b>GO:1902905</b> | 193 | 0.408 | 2.14E-08 | 4.06E-06 | positive regulation of supramolecular fiber organization |
| <b>GO:0042267</b> | 48  | 0.773 | 2.17E-08 | 4.09E-06 | natural killer cell mediated cytotoxicity                |
| <b>GO:0043534</b> | 112 | 0.537 | 2.24E-08 | 4.22E-06 | blood vessel endothelial cell migration                  |
| <b>GO:1903829</b> | 321 | 0.317 | 2.26E-08 | 4.24E-06 | positive regulation of cellular protein localization     |
| <b>GO:0061458</b> | 428 | 0.274 | 2.29E-08 | 4.28E-06 | reproductive system development                          |
| <b>GO:0050808</b> | 393 | 0.285 | 2.45E-08 | 4.57E-06 | synapse organization                                     |
| <b>GO:0046822</b> | 107 | 0.547 | 2.48E-08 | 4.62E-06 | regulation of nucleocytoplasmic transport                |
| <b>GO:0014066</b> | 118 | 0.517 | 2.66E-08 | 4.93E-06 | regulation of phosphatidylinositol 3-kinase signaling    |
| <b>GO:0034109</b> | 80  | 0.616 | 3.04E-08 | 5.62E-06 | homotypic cell-cell adhesion                             |
| <b>GO:0048660</b> | 132 | 0.489 | 3.21E-08 | 5.91E-06 | regulation of smooth muscle cell proliferation           |
| <b>GO:0050731</b> | 177 | 0.419 | 3.34E-08 | 6.12E-06 | positive regulation of peptidyl-tyrosine phosphorylation |
| <b>GO:0010959</b> | 369 | 0.291 | 3.40E-08 | 6.22E-06 | regulation of metal ion transport                        |
| <b>GO:0072503</b> | 467 | 0.259 | 3.51E-08 | 6.40E-06 | cellular divalent inorganic cation homeostasis           |
| <b>GO:0051017</b> | 148 | 0.457 | 3.55E-08 | 6.44E-06 | actin filament bundle assembly                           |
| <b>GO:0001909</b> | 88  | 0.599 | 3.55E-08 | 6.44E-06 | leukocyte mediated cytotoxicity                          |
| <b>GO:0003158</b> | 119 | 0.508 | 3.63E-08 | 6.56E-06 | endothelium development                                  |
| <b>GO:0071216</b> | 211 | 0.388 | 3.64E-08 | 6.56E-06 | cellular response to biotic stimulus                     |

|                   |     |       |          |          |                                                                                           |
|-------------------|-----|-------|----------|----------|-------------------------------------------------------------------------------------------|
| <b>GO:0010721</b> | 326 | 0.308 | 3.73E-08 | 6.69E-06 | negative regulation of cell development                                                   |
| <b>GO:0048588</b> | 219 | 0.375 | 3.84E-08 | 6.87E-06 | developmental cell growth                                                                 |
| <b>GO:0048659</b> | 133 | 0.483 | 4.07E-08 | 7.26E-06 | smooth muscle cell proliferation                                                          |
| <b>GO:0051258</b> | 260 | 0.345 | 4.34E-08 | 7.72E-06 | protein polymerization                                                                    |
| <b>GO:0051893</b> | 61  | 0.688 | 4.51E-08 | 7.95E-06 | regulation of focal adhesion assembly                                                     |
| <b>GO:0090109</b> | 61  | 0.688 | 4.51E-08 | 7.95E-06 | regulation of cell-substrate junction assembly                                            |
| <b>GO:0150116</b> | 61  | 0.688 | 4.51E-08 | 7.95E-06 | regulation of cell-substrate junction organization                                        |
| <b>GO:0002040</b> | 112 | 0.518 | 4.64E-08 | 8.16E-06 | sprouting angiogenesis                                                                    |
| <b>GO:0000070</b> | 144 | 0.464 | 4.67E-08 | 8.17E-06 | mitotic sister chromatid segregation                                                      |
| <b>GO:0060537</b> | 384 | 0.282 | 4.69E-08 | 8.19E-06 | muscle tissue development                                                                 |
| <b>GO:0070374</b> | 193 | 0.398 | 4.75E-08 | 8.26E-06 | positive regulation of ERK1 and ERK2 cascade                                              |
| <b>GO:0051283</b> | 122 | 0.503 | 4.77E-08 | 8.27E-06 | negative regulation of sequestering of calcium ion                                        |
| <b>GO:1903708</b> | 179 | 0.414 | 5.39E-08 | 9.29E-06 | positive regulation of hemopoiesis                                                        |
| <b>GO:1990266</b> | 104 | 0.536 | 5.38E-08 | 9.29E-06 | neutrophil migration                                                                      |
| <b>GO:0072507</b> | 486 | 0.251 | 5.47E-08 | 9.41E-06 | divalent inorganic cation homeostasis                                                     |
| <b>GO:0043535</b> | 88  | 0.585 | 5.62E-08 | 9.63E-06 | regulation of blood vessel endothelial cell migration                                     |
| <b>GO:0048762</b> | 211 | 0.377 | 5.81E-08 | 9.94E-06 | mesenchymal cell differentiation                                                          |
| <b>GO:0007179</b> | 181 | 0.406 | 5.95E-08 | 1.01E-05 | transforming growth factor beta receptor signaling pathway                                |
| <b>GO:0044409</b> | 126 | 0.485 | 6.05E-08 | 1.03E-05 | entry into host                                                                           |
| <b>GO:0051924</b> | 238 | 0.356 | 6.23E-08 | 1.06E-05 | regulation of calcium ion transport                                                       |
| <b>GO:0030593</b> | 89  | 0.571 | 6.35E-08 | 1.07E-05 | neutrophil chemotaxis                                                                     |
| <b>GO:0030183</b> | 118 | 0.503 | 6.40E-08 | 1.08E-05 | B cell differentiation                                                                    |
| <b>GO:0071674</b> | 77  | 0.608 | 6.58E-08 | 1.10E-05 | mononuclear cell migration                                                                |
| <b>GO:0060759</b> | 160 | 0.434 | 6.94E-08 | 1.16E-05 | regulation of response to cytokine stimulus                                               |
| <b>GO:0014706</b> | 368 | 0.284 | 7.04E-08 | 1.18E-05 | striated muscle tissue development                                                        |
| <b>GO:0002504</b> | 83  | 0.620 | 7.21E-08 | 1.20E-05 | antigen processing and presentation of peptide or polysaccharide antigen via MHC class II |
| <b>GO:0071222</b> | 181 | 0.409 | 7.28E-08 | 1.21E-05 | cellular response to lipopolysaccharide                                                   |
| <b>GO:0045787</b> | 359 | 0.288 | 7.35E-08 | 1.22E-05 | positive regulation of cell cycle                                                         |
| <b>GO:0002705</b> | 119 | 0.504 | 7.38E-08 | 1.22E-05 | positive regulation of leukocyte mediated immunity                                        |
| <b>GO:0045576</b> | 57  | 0.722 | 7.55E-08 | 1.24E-05 | mast cell activation                                                                      |

|                   |     |       |          |          |                                                                                                                                         |
|-------------------|-----|-------|----------|----------|-----------------------------------------------------------------------------------------------------------------------------------------|
| <b>GO:0002822</b> | 130 | 0.482 | 7.64E-08 | 1.25E-05 | regulation of adaptive immune response based on somatic recombination of immune receptors built from immunoglobulin superfamily domains |
| <b>GO:0061900</b> | 51  | 0.751 | 7.92E-08 | 1.29E-05 | glial cell activation                                                                                                                   |
| <b>GO:0014812</b> | 79  | 0.593 | 7.97E-08 | 1.30E-05 | muscle cell migration                                                                                                                   |
| <b>GO:0001774</b> | 43  | 0.811 | 8.18E-08 | 1.32E-05 | microglial cell activation                                                                                                              |
| <b>GO:0002269</b> | 43  | 0.811 | 8.18E-08 | 1.32E-05 | leukocyte activation involved in inflammatory response                                                                                  |
| <b>GO:0051897</b> | 163 | 0.423 | 8.54E-08 | 1.38E-05 | positive regulation of protein kinase B signaling                                                                                       |
| <b>GO:0006816</b> | 415 | 0.267 | 8.60E-08 | 1.38E-05 | calcium ion transport                                                                                                                   |
| <b>GO:0014068</b> | 86  | 0.580 | 9.44E-08 | 1.51E-05 | positive regulation of phosphatidylinositol 3-kinase signaling                                                                          |
| <b>GO:0001503</b> | 380 | 0.277 | 9.51E-08 | 1.51E-05 | ossification                                                                                                                            |
| <b>GO:0030101</b> | 67  | 0.644 | 9.99E-08 | 1.59E-05 | natural killer cell activation                                                                                                          |
| <b>GO:0071621</b> | 107 | 0.515 | 1.00E-07 | 1.59E-05 | granulocyte chemotaxis                                                                                                                  |
| <b>GO:0051896</b> | 214 | 0.370 | 1.02E-07 | 1.61E-05 | regulation of protein kinase B signaling                                                                                                |
| <b>GO:0051282</b> | 123 | 0.488 | 1.05E-07 | 1.65E-05 | regulation of sequestering of calcium ion                                                                                               |
| <b>GO:0048511</b> | 297 | 0.311 | 1.09E-07 | 1.71E-05 | rhythmic process                                                                                                                        |
| <b>GO:0046847</b> | 57  | 0.687 | 1.09E-07 | 1.71E-05 | filopodium assembly                                                                                                                     |
| <b>GO:0001655</b> | 334 | 0.294 | 1.10E-07 | 1.72E-05 | urogenital system development                                                                                                           |
| <b>GO:0002495</b> | 82  | 0.615 | 1.12E-07 | 1.75E-05 | antigen processing and presentation of peptide antigen via MHC class II                                                                 |
| <b>GO:0071219</b> | 187 | 0.396 | 1.14E-07 | 1.77E-05 | cellular response to molecule of bacterial origin                                                                                       |
| <b>GO:0098813</b> | 246 | 0.343 | 1.16E-07 | 1.79E-05 | nuclear chromosome segregation                                                                                                          |
| <b>GO:0070838</b> | 460 | 0.251 | 1.18E-07 | 1.82E-05 | divalent metal ion transport                                                                                                            |
| <b>GO:0032609</b> | 75  | 0.623 | 1.24E-07 | 1.92E-05 | interferon-gamma production                                                                                                             |
| <b>GO:0061640</b> | 95  | 0.564 | 1.26E-07 | 1.94E-05 | cytoskeleton-dependent cytokinesis                                                                                                      |
| <b>GO:0031032</b> | 191 | 0.387 | 1.31E-07 | 2.01E-05 | actomyosin structure organization                                                                                                       |
| <b>GO:0072511</b> | 464 | 0.249 | 1.36E-07 | 2.08E-05 | divalent inorganic cation transport                                                                                                     |
| <b>GO:0051209</b> | 120 | 0.489 | 1.38E-07 | 2.10E-05 | release of sequestered calcium ion into cytosol                                                                                         |
| <b>GO:0048013</b> | 85  | 0.587 | 1.40E-07 | 2.12E-05 | ephrin receptor signaling pathway                                                                                                       |
| <b>GO:0050772</b> | 84  | 0.568 | 1.41E-07 | 2.13E-05 | positive regulation of axonogenesis                                                                                                     |
| <b>GO:0050770</b> | 182 | 0.394 | 1.42E-07 | 2.14E-05 | regulation of axonogenesis                                                                                                              |

|                   |     |       |          |          |                                                               |
|-------------------|-----|-------|----------|----------|---------------------------------------------------------------|
| <b>GO:1903034</b> | 155 | 0.430 | 1.48E-07 | 2.23E-05 | regulation of response to wounding                            |
| <b>GO:1902107</b> | 141 | 0.450 | 1.52E-07 | 2.29E-05 | positive regulation of leukocyte differentiation              |
| <b>GO:0001959</b> | 151 | 0.434 | 1.54E-07 | 2.32E-05 | regulation of cytokine-mediated signaling pathway             |
| <b>GO:0071214</b> | 317 | 0.299 | 1.56E-07 | 2.33E-05 | cellular response to abiotic stimulus                         |
| <b>GO:0104004</b> | 317 | 0.299 | 1.56E-07 | 2.33E-05 | cellular response to environmental stimulus                   |
| <b>GO:0051208</b> | 126 | 0.474 | 1.62E-07 | 2.41E-05 | sequestering of calcium ion                                   |
| <b>GO:0031099</b> | 187 | 0.389 | 1.67E-07 | 2.48E-05 | regeneration                                                  |
| <b>GO:1903038</b> | 112 | 0.503 | 1.67E-07 | 2.48E-05 | negative regulation of leukocyte cell-cell adhesion           |
| <b>GO:0002715</b> | 35  | 0.821 | 1.75E-07 | 2.58E-05 | regulation of natural killer cell mediated immunity           |
| <b>GO:0021700</b> | 275 | 0.317 | 1.97E-07 | 2.91E-05 | developmental maturation                                      |
| <b>GO:0010811</b> | 119 | 0.479 | 1.98E-07 | 2.92E-05 | positive regulation of cell-substrate adhesion                |
| <b>GO:0048732</b> | 442 | 0.250 | 2.05E-07 | 3.01E-05 | gland development                                             |
| <b>GO:0033627</b> | 67  | 0.639 | 2.08E-07 | 3.05E-05 | cell adhesion mediated by integrin                            |
| <b>GO:0010718</b> | 46  | 0.780 | 2.10E-07 | 3.07E-05 | positive regulation of epithelial to mesenchymal transition   |
| <b>GO:0032732</b> | 19  | 1.101 | 2.11E-07 | 3.07E-05 | positive regulation of interleukin-1 production               |
| <b>GO:0090068</b> | 271 | 0.320 | 2.12E-07 | 3.07E-05 | positive regulation of cell cycle process                     |
| <b>GO:0043112</b> | 186 | 0.383 | 2.17E-07 | 3.14E-05 | receptor metabolic process                                    |
| <b>GO:0061028</b> | 41  | 0.805 | 2.17E-07 | 3.14E-05 | establishment of endothelial barrier                          |
| <b>GO:0007088</b> | 160 | 0.415 | 2.18E-07 | 3.14E-05 | regulation of mitotic nuclear division                        |
| <b>GO:0018209</b> | 294 | 0.306 | 2.24E-07 | 3.23E-05 | peptidyl-serine modification                                  |
| <b>GO:0002064</b> | 207 | 0.361 | 2.29E-07 | 3.29E-05 | epithelial cell development                                   |
| <b>GO:0048871</b> | 466 | 0.243 | 2.33E-07 | 3.33E-05 | multicellular organismal homeostasis                          |
| <b>GO:0007221</b> | 18  | 1.162 | 2.39E-07 | 3.41E-05 | positive regulation of transcription of Notch receptor target |
| <b>GO:0000280</b> | 397 | 0.263 | 2.42E-07 | 3.44E-05 | nuclear division                                              |
| <b>GO:1903306</b> | 24  | 1.026 | 2.57E-07 | 3.64E-05 | negative regulation of regulated secretory pathway            |
| <b>GO:0042269</b> | 33  | 0.836 | 2.61E-07 | 3.69E-05 | regulation of natural killer cell mediated cytotoxicity       |
| <b>GO:0042063</b> | 286 | 0.308 | 2.66E-07 | 3.75E-05 | gliogenesis                                                   |
| <b>GO:0046635</b> | 61  | 0.653 | 2.72E-07 | 3.82E-05 | positive regulation of alpha-beta T cell activation           |
| <b>GO:1990138</b> | 164 | 0.404 | 2.76E-07 | 3.87E-05 | neuron projection extension                                   |



|                   |     |       |          |          |                                                                                   |
|-------------------|-----|-------|----------|----------|-----------------------------------------------------------------------------------|
| <b>GO:0050766</b> | 63  | 0.677 | 2.78E-07 | 3.90E-05 | positive regulation of phagocytosis                                               |
| <b>GO:0007411</b> | 271 | 0.315 | 2.83E-07 | 3.96E-05 | axon guidance                                                                     |
| <b>GO:0035710</b> | 89  | 0.549 | 2.87E-07 | 3.99E-05 | CD4-positive, alpha-beta T cell activation                                        |
| <b>GO:0021537</b> | 249 | 0.327 | 3.01E-07 | 4.19E-05 | telencephalon development                                                         |
| <b>GO:0043367</b> | 73  | 0.602 | 3.10E-07 | 4.30E-05 | CD4-positive, alpha-beta T cell differentiation                                   |
| <b>GO:0051495</b> | 215 | 0.353 | 3.23E-07 | 4.47E-05 | positive regulation of cytoskeleton organization                                  |
| <b>GO:1903555</b> | 106 | 0.512 | 3.24E-07 | 4.47E-05 | regulation of tumor necrosis factor superfamily cytokine production               |
| <b>GO:0038127</b> | 135 | 0.443 | 3.35E-07 | 4.61E-05 | ERBB signaling pathway                                                            |
| <b>GO:0032649</b> | 69  | 0.630 | 3.36E-07 | 4.61E-05 | regulation of interferon-gamma production                                         |
| <b>GO:0097485</b> | 272 | 0.313 | 3.41E-07 | 4.67E-05 | neuron projection guidance                                                        |
| <b>GO:0048675</b> | 117 | 0.473 | 3.47E-07 | 4.74E-05 | axon extension                                                                    |
| <b>GO:0046637</b> | 62  | 0.646 | 3.50E-07 | 4.77E-05 | regulation of alpha-beta T cell differentiation                                   |
| <b>GO:0097191</b> | 215 | 0.351 | 3.66E-07 | 4.98E-05 | extrinsic apoptotic signaling pathway                                             |
| <b>GO:0051656</b> | 398 | 0.259 | 3.72E-07 | 5.03E-05 | establishment of organelle localization                                           |
| <b>GO:0019886</b> | 79  | 0.600 | 3.71E-07 | 5.03E-05 | antigen processing and presentation of exogenous peptide antigen via MHC class II |
| <b>GO:0090257</b> | 226 | 0.341 | 3.76E-07 | 5.07E-05 | regulation of muscle system process                                               |
| <b>GO:0051047</b> | 321 | 0.287 | 3.85E-07 | 5.18E-05 | positive regulation of secretion                                                  |
| <b>GO:0071706</b> | 110 | 0.500 | 3.92E-07 | 5.27E-05 | tumor necrosis factor superfamily cytokine production                             |
| <b>GO:0050855</b> | 26  | 0.944 | 3.93E-07 | 5.27E-05 | regulation of B cell receptor signaling pathway                                   |
| <b>GO:0046328</b> | 180 | 0.383 | 4.24E-07 | 5.68E-05 | regulation of JNK cascade                                                         |
| <b>GO:0035023</b> | 137 | 0.435 | 4.35E-07 | 5.79E-05 | regulation of Rho protein signal transduction                                     |
| <b>GO:0101023</b> | 18  | 1.045 | 4.36E-07 | 5.79E-05 | vascular endothelial cell proliferation                                           |
| <b>GO:1905562</b> | 18  | 1.045 | 4.36E-07 | 5.79E-05 | regulation of vascular endothelial cell proliferation                             |
| <b>GO:0060840</b> | 88  | 0.532 | 4.42E-07 | 5.86E-05 | artery development                                                                |
| <b>GO:0050890</b> | 291 | 0.299 | 4.52E-07 | 5.97E-05 | cognition                                                                         |
| <b>GO:0002708</b> | 88  | 0.552 | 4.65E-07 | 6.14E-05 | positive regulation of lymphocyte mediated immunity                               |
| <b>GO:1901214</b> | 308 | 0.290 | 4.79E-07 | 6.30E-05 | regulation of neuron death                                                        |
| <b>GO:0048639</b> | 169 | 0.389 | 4.84E-07 | 6.36E-05 | positive regulation of developmental growth                                       |
| <b>GO:0019722</b> | 204 | 0.354 | 5.17E-07 | 6.78E-05 | calcium-mediated signaling                                                        |

|                   |     |       |          |          |                                                                                             |
|-------------------|-----|-------|----------|----------|---------------------------------------------------------------------------------------------|
| <b>GO:0045216</b> | 182 | 0.376 | 5.20E-07 | 6.80E-05 | cell-cell junction organization                                                             |
| <b>GO:0001912</b> | 42  | 0.764 | 5.54E-07 | 7.23E-05 | positive regulation of leukocyte mediated cytotoxicity                                      |
| <b>GO:0042542</b> | 132 | 0.446 | 5.67E-07 | 7.38E-05 | response to hydrogen peroxide                                                               |
| <b>GO:0007051</b> | 162 | 0.401 | 5.72E-07 | 7.43E-05 | spindle organization                                                                        |
| <b>GO:0007254</b> | 210 | 0.349 | 5.95E-07 | 7.71E-05 | JNK cascade                                                                                 |
| <b>GO:0045621</b> | 89  | 0.533 | 6.26E-07 | 8.10E-05 | positive regulation of lymphocyte differentiation                                           |
| <b>GO:0071349</b> | 48  | 0.743 | 6.31E-07 | 8.14E-05 | cellular response to interleukin-12                                                         |
| <b>GO:0042742</b> | 192 | 0.362 | 6.84E-07 | 8.79E-05 | defense response to bacterium                                                               |
| <b>GO:0097553</b> | 136 | 0.430 | 6.95E-07 | 8.90E-05 | calcium ion transmembrane import into cytosol                                               |
| <b>GO:0007173</b> | 113 | 0.472 | 7.50E-07 | 9.59E-05 | epidermal growth factor receptor signaling pathway                                          |
| <b>GO:0070671</b> | 49  | 0.726 | 7.88E-07 | 1.01E-04 | response to interleukin-12                                                                  |
| <b>GO:0045666</b> | 358 | 0.264 | 8.05E-07 | 1.03E-04 | positive regulation of neuron differentiation                                               |
| <b>GO:0051092</b> | 147 | 0.413 | 8.29E-07 | 1.05E-04 | positive regulation of NF-kappaB transcription factor activity                              |
| <b>GO:0045428</b> | 57  | 0.654 | 8.94E-07 | 1.13E-04 | regulation of nitric oxide biosynthetic process                                             |
| <b>GO:0045446</b> | 101 | 0.489 | 9.48E-07 | 1.20E-04 | endothelial cell differentiation                                                            |
| <b>GO:0050921</b> | 132 | 0.430 | 9.65E-07 | 1.21E-04 | positive regulation of chemotaxis                                                           |
| <b>GO:0016049</b> | 465 | 0.230 | 9.94E-07 | 1.25E-04 | cell growth                                                                                 |
| <b>GO:0007611</b> | 255 | 0.310 | 9.92E-07 | 1.25E-04 | learning or memory                                                                          |
| <b>GO:0000302</b> | 218 | 0.336 | 1.02E-06 | 1.28E-04 | response to reactive oxygen species                                                         |
| <b>GO:0060402</b> | 155 | 0.397 | 1.03E-06 | 1.28E-04 | calcium ion transport into cytosol                                                          |
| <b>GO:0032635</b> | 88  | 0.530 | 1.03E-06 | 1.28E-04 | interleukin-6 production                                                                    |
| <b>GO:0070486</b> | 12  | 1.214 | 1.09E-06 | 1.35E-04 | leukocyte aggregation                                                                       |
| <b>GO:0048002</b> | 162 | 0.389 | 1.13E-06 | 1.40E-04 | antigen processing and presentation of peptide antigen                                      |
| <b>GO:0070482</b> | 377 | 0.254 | 1.14E-06 | 1.41E-04 | response to oxygen levels                                                                   |
| <b>GO:0062197</b> | 330 | 0.272 | 1.15E-06 | 1.42E-04 | cellular response to chemical stress                                                        |
| <b>GO:0032102</b> | 333 | 0.270 | 1.17E-06 | 1.44E-04 | negative regulation of response to external stimulus                                        |
| <b>GO:0045058</b> | 48  | 0.706 | 1.17E-06 | 1.44E-04 | T cell selection                                                                            |
| <b>GO:0002687</b> | 124 | 0.441 | 1.20E-06 | 1.47E-04 | positive regulation of leukocyte migration                                                  |
| <b>GO:0007187</b> | 232 | 0.321 | 1.20E-06 | 1.47E-04 | G protein-coupled receptor signaling pathway, coupled to cyclic nucleotide second messenger |
| <b>GO:0070664</b> | 71  | 0.583 | 1.23E-06 | 1.50E-04 | negative regulation of leukocyte proliferation                                              |
| <b>GO:0030316</b> | 94  | 0.509 | 1.27E-06 | 1.55E-04 | osteoclast differentiation                                                                  |

|                   |     |       |          |          |                                                                       |
|-------------------|-----|-------|----------|----------|-----------------------------------------------------------------------|
| <b>GO:0051098</b> | 356 | 0.260 | 1.28E-06 | 1.55E-04 | regulation of binding                                                 |
| <b>GO:0035265</b> | 180 | 0.364 | 1.28E-06 | 1.55E-04 | organ growth                                                          |
| <b>GO:0002260</b> | 60  | 0.653 | 1.29E-06 | 1.56E-04 | lymphocyte homeostasis                                                |
| <b>GO:0046718</b> | 113 | 0.456 | 1.30E-06 | 1.57E-04 | viral entry into host cell                                            |
| <b>GO:0018105</b> | 274 | 0.296 | 1.33E-06 | 1.60E-04 | peptidyl-serine phosphorylation                                       |
| <b>GO:0010812</b> | 60  | 0.621 | 1.34E-06 | 1.61E-04 | negative regulation of cell-substrate adhesion                        |
| <b>GO:0051651</b> | 208 | 0.339 | 1.38E-06 | 1.66E-04 | maintenance of location in cell                                       |
| <b>GO:0051091</b> | 255 | 0.306 | 1.41E-06 | 1.69E-04 | positive regulation of DNA-binding transcription factor activity      |
| <b>GO:0014909</b> | 66  | 0.583 | 1.41E-06 | 1.69E-04 | smooth muscle cell migration                                          |
| <b>GO:0051961</b> | 306 | 0.278 | 1.48E-06 | 1.76E-04 | negative regulation of nervous system development                     |
| <b>GO:0030865</b> | 47  | 0.725 | 1.50E-06 | 1.78E-04 | cortical cytoskeleton organization                                    |
| <b>GO:0006606</b> | 135 | 0.419 | 1.52E-06 | 1.80E-04 | protein import into nucleus                                           |
| <b>GO:0002292</b> | 66  | 0.599 | 1.57E-06 | 1.85E-04 | T cell differentiation involved in immune response                    |
| <b>GO:0030838</b> | 92  | 0.506 | 1.60E-06 | 1.88E-04 | positive regulation of actin filament polymerization                  |
| <b>GO:0001953</b> | 37  | 0.763 | 1.60E-06 | 1.88E-04 | negative regulation of cell-matrix adhesion                           |
| <b>GO:0045089</b> | 190 | 0.353 | 1.64E-06 | 1.93E-04 | positive regulation of innate immune response                         |
| <b>GO:2000273</b> | 34  | 0.808 | 1.74E-06 | 2.03E-04 | positive regulation of signaling receptor activity                    |
| <b>GO:0051057</b> | 73  | 0.563 | 1.78E-06 | 2.07E-04 | positive regulation of small GTPase mediated signal transduction      |
| <b>GO:0010770</b> | 152 | 0.389 | 1.82E-06 | 2.11E-04 | positive regulation of cell morphogenesis involved in differentiation |
| <b>GO:0032675</b> | 83  | 0.535 | 1.82E-06 | 2.11E-04 | regulation of interleukin-6 production                                |
| <b>GO:0000281</b> | 70  | 0.590 | 1.92E-06 | 2.23E-04 | mitotic cytokinesis                                                   |
| <b>GO:0002577</b> | 16  | 1.058 | 1.95E-06 | 2.26E-04 | regulation of antigen processing and presentation                     |
| <b>GO:0033047</b> | 65  | 0.594 | 1.97E-06 | 2.27E-04 | regulation of mitotic sister chromatid segregation                    |
| <b>GO:0010595</b> | 97  | 0.485 | 2.00E-06 | 2.30E-04 | positive regulation of endothelial cell migration                     |
| <b>GO:0048545</b> | 376 | 0.248 | 2.03E-06 | 2.33E-04 | response to steroid hormone                                           |
| <b>GO:0045773</b> | 41  | 0.719 | 2.05E-06 | 2.35E-04 | positive regulation of axon extension                                 |
| <b>GO:1990868</b> | 85  | 0.524 | 2.07E-06 | 2.36E-04 | response to chemokine                                                 |
| <b>GO:1990869</b> | 85  | 0.524 | 2.07E-06 | 2.36E-04 | cellular response to chemokine                                        |
| <b>GO:0001771</b> | 14  | 1.100 | 2.15E-06 | 2.45E-04 | immunological synapse formation                                       |

|                   |     |       |          |          |                                                                           |
|-------------------|-----|-------|----------|----------|---------------------------------------------------------------------------|
| <b>GO:0038063</b> | 10  | 1.175 | 2.16E-06 | 2.45E-04 | collagen-activated tyrosine kinase receptor signaling pathway             |
| <b>GO:0032680</b> | 103 | 0.479 | 2.18E-06 | 2.47E-04 | regulation of tumor necrosis factor production                            |
| <b>GO:1901654</b> | 194 | 0.342 | 2.19E-06 | 2.48E-04 | response to ketone                                                        |
| <b>GO:0007188</b> | 205 | 0.332 | 2.21E-06 | 2.49E-04 | adenylate cyclase-modulating G protein-coupled receptor signaling pathway |
| <b>GO:0019935</b> | 199 | 0.337 | 2.24E-06 | 2.51E-04 | cyclic-nucleotide-mediated signaling                                      |
| <b>GO:0046824</b> | 64  | 0.587 | 2.29E-06 | 2.57E-04 | positive regulation of nucleocytoplasmic transport                        |
| <b>GO:0042493</b> | 394 | 0.241 | 2.32E-06 | 2.60E-04 | response to drug                                                          |
| <b>GO:0043536</b> | 54  | 0.641 | 2.33E-06 | 2.60E-04 | positive regulation of blood vessel endothelial cell migration            |
| <b>GO:0001894</b> | 216 | 0.324 | 2.34E-06 | 2.61E-04 | tissue homeostasis                                                        |
| <b>GO:0030866</b> | 42  | 0.757 | 2.36E-06 | 2.63E-04 | cortical actin cytoskeleton organization                                  |
| <b>GO:0043277</b> | 46  | 0.682 | 2.37E-06 | 2.63E-04 | apoptotic cell clearance                                                  |
| <b>GO:0030219</b> | 74  | 0.562 | 2.38E-06 | 2.64E-04 | megakaryocyte differentiation                                             |
| <b>GO:0045582</b> | 78  | 0.541 | 2.43E-06 | 2.68E-04 | positive regulation of T cell differentiation                             |
| <b>GO:0036005</b> | 12  | 1.140 | 2.43E-06 | 2.68E-04 | response to macrophage colony-stimulating factor                          |
| <b>GO:0036006</b> | 12  | 1.140 | 2.43E-06 | 2.68E-04 | cellular response to macrophage colony-stimulating factor stimulus        |
| <b>GO:0030010</b> | 134 | 0.411 | 2.49E-06 | 2.73E-04 | establishment of cell polarity                                            |
| <b>GO:0016202</b> | 132 | 0.411 | 2.51E-06 | 2.75E-04 | regulation of striated muscle tissue development                          |
| <b>GO:0032640</b> | 107 | 0.468 | 2.53E-06 | 2.77E-04 | tumor necrosis factor production                                          |
| <b>GO:0032835</b> | 61  | 0.598 | 2.58E-06 | 2.81E-04 | glomerulus development                                                    |
| <b>GO:0034103</b> | 75  | 0.530 | 2.64E-06 | 2.88E-04 | regulation of tissue remodeling                                           |
| <b>GO:0070997</b> | 343 | 0.256 | 2.67E-06 | 2.91E-04 | neuron death                                                              |
| <b>GO:0002821</b> | 94  | 0.497 | 2.70E-06 | 2.94E-04 | positive regulation of adaptive immune response                           |
| <b>GO:0002468</b> | 12  | 1.202 | 2.83E-06 | 3.06E-04 | dendritic cell antigen processing and presentation                        |
| <b>GO:0014910</b> | 60  | 0.590 | 2.84E-06 | 3.07E-04 | regulation of smooth muscle cell migration                                |
| <b>GO:1902532</b> | 477 | 0.217 | 2.96E-06 | 3.18E-04 | negative regulation of intracellular signal transduction                  |
| <b>GO:0051261</b> | 105 | 0.469 | 2.99E-06 | 3.21E-04 | protein depolymerization                                                  |
| <b>GO:1901222</b> | 101 | 0.471 | 2.99E-06 | 3.21E-04 | regulation of NIK/NF-kappaB signaling                                     |
| <b>GO:0002548</b> | 52  | 0.634 | 3.10E-06 | 3.32E-04 | monocyte chemotaxis                                                       |
| <b>GO:0014896</b> | 87  | 0.506 | 3.14E-06 | 3.35E-04 | muscle hypertrophy                                                        |
| <b>GO:0000187</b> | 147 | 0.386 | 3.17E-06 | 3.38E-04 | activation of MAPK activity                                               |

|                   |     |       |          |          |                                                                              |
|-------------------|-----|-------|----------|----------|------------------------------------------------------------------------------|
| <b>GO:0051701</b> | 190 | 0.341 | 3.23E-06 | 3.43E-04 | interaction with host                                                        |
| <b>GO:0045920</b> | 32  | 0.869 | 3.23E-06 | 3.43E-04 | negative regulation of exocytosis                                            |
| <b>GO:0048661</b> | 85  | 0.515 | 3.28E-06 | 3.47E-04 | positive regulation of smooth muscle cell proliferation                      |
| <b>GO:1901861</b> | 135 | 0.401 | 3.29E-06 | 3.47E-04 | regulation of muscle tissue development                                      |
| <b>GO:0001666</b> | 343 | 0.254 | 3.38E-06 | 3.56E-04 | response to hypoxia                                                          |
| <b>GO:0061041</b> | 126 | 0.422 | 3.38E-06 | 3.56E-04 | regulation of wound healing                                                  |
| <b>GO:0034446</b> | 98  | 0.474 | 3.50E-06 | 3.67E-04 | substrate adhesion-dependent cell spreading                                  |
| <b>GO:0050858</b> | 25  | 0.883 | 3.58E-06 | 3.75E-04 | negative regulation of antigen receptor-mediated signaling pathway           |
| <b>GO:0031102</b> | 57  | 0.608 | 3.62E-06 | 3.78E-04 | neuron projection regeneration                                               |
| <b>GO:0034121</b> | 63  | 0.626 | 3.64E-06 | 3.79E-04 | regulation of toll-like receptor signaling pathway                           |
| <b>GO:0001937</b> | 37  | 0.739 | 3.68E-06 | 3.83E-04 | negative regulation of endothelial cell proliferation                        |
| <b>GO:0099177</b> | 433 | 0.225 | 3.72E-06 | 3.87E-04 | regulation of trans-synaptic signaling                                       |
| <b>GO:0007052</b> | 103 | 0.463 | 3.74E-06 | 3.88E-04 | mitotic spindle organization                                                 |
| <b>GO:0035722</b> | 46  | 0.701 | 3.80E-06 | 3.94E-04 | interleukin-12-mediated signaling pathway                                    |
| <b>GO:0046633</b> | 31  | 0.798 | 3.84E-06 | 3.97E-04 | alpha-beta T cell proliferation                                              |
| <b>GO:0032388</b> | 212 | 0.322 | 3.90E-06 | 4.00E-04 | positive regulation of intracellular transport                               |
| <b>GO:0010976</b> | 273 | 0.282 | 3.92E-06 | 4.02E-04 | positive regulation of neuron projection development                         |
| <b>GO:0051302</b> | 157 | 0.371 | 4.05E-06 | 4.14E-04 | regulation of cell division                                                  |
| <b>GO:2000514</b> | 58  | 0.606 | 4.15E-06 | 4.23E-04 | regulation of CD4-positive, alpha-beta T cell activation                     |
| <b>GO:0019884</b> | 155 | 0.376 | 4.20E-06 | 4.28E-04 | antigen processing and presentation of exogenous antigen                     |
| <b>GO:1903557</b> | 52  | 0.682 | 4.20E-06 | 4.28E-04 | positive regulation of tumor necrosis factor superfamily cytokine production |
| <b>GO:0061515</b> | 70  | 0.578 | 4.28E-06 | 4.35E-04 | myeloid cell development                                                     |
| <b>GO:0006968</b> | 44  | 0.729 | 4.32E-06 | 4.38E-04 | cellular defense response                                                    |
| <b>GO:0007517</b> | 383 | 0.237 | 4.43E-06 | 4.49E-04 | muscle organ development                                                     |
| <b>GO:0002440</b> | 177 | 0.352 | 4.46E-06 | 4.50E-04 | production of molecular mediator of immune response                          |
| <b>GO:0048634</b> | 135 | 0.396 | 4.48E-06 | 4.51E-04 | regulation of muscle organ development                                       |
| <b>GO:0110020</b> | 89  | 0.491 | 4.62E-06 | 4.66E-04 | regulation of actomyosin structure organization                              |
| <b>GO:0036293</b> | 353 | 0.247 | 4.74E-06 | 4.77E-04 | response to decreased oxygen levels                                          |

|                   |     |       |          |          |                                                                  |
|-------------------|-----|-------|----------|----------|------------------------------------------------------------------|
| <b>GO:0150077</b> | 34  | 0.765 | 4.93E-06 | 4.95E-04 | regulation of neuroinflammatory response                         |
| <b>GO:0045471</b> | 130 | 0.401 | 4.94E-06 | 4.95E-04 | response to ethanol                                              |
| <b>GO:0043303</b> | 45  | 0.689 | 5.04E-06 | 5.04E-04 | mast cell degranulation                                          |
| <b>GO:0032729</b> | 41  | 0.716 | 5.20E-06 | 5.18E-04 | positive regulation of interferon-gamma production               |
| <b>GO:2000114</b> | 21  | 0.990 | 5.20E-06 | 5.18E-04 | regulation of establishment of cell polarity                     |
| <b>GO:0050804</b> | 432 | 0.222 | 5.25E-06 | 5.22E-04 | modulation of chemical synaptic transmission                     |
| <b>GO:0051783</b> | 185 | 0.338 | 5.27E-06 | 5.22E-04 | regulation of nuclear division                                   |
| <b>GO:1901992</b> | 77  | 0.536 | 5.26E-06 | 5.22E-04 | positive regulation of mitotic cell cycle phase transition       |
| <b>GO:0032945</b> | 66  | 0.566 | 5.40E-06 | 5.33E-04 | negative regulation of mononuclear cell proliferation            |
| <b>GO:0050672</b> | 66  | 0.566 | 5.40E-06 | 5.33E-04 | negative regulation of lymphocyte proliferation                  |
| <b>GO:0035904</b> | 53  | 0.602 | 5.50E-06 | 5.43E-04 | aorta development                                                |
| <b>GO:0050768</b> | 285 | 0.272 | 5.57E-06 | 5.46E-04 | negative regulation of neurogenesis                              |
| <b>GO:0019079</b> | 106 | 0.446 | 5.56E-06 | 5.46E-04 | viral genome replication                                         |
| <b>GO:0046579</b> | 65  | 0.568 | 5.56E-06 | 5.46E-04 | positive regulation of Ras protein signal transduction           |
| <b>GO:0008037</b> | 140 | 0.386 | 5.59E-06 | 5.48E-04 | cell recognition                                                 |
| <b>GO:0071604</b> | 37  | 0.725 | 5.61E-06 | 5.49E-04 | transforming growth factor beta production                       |
| <b>GO:0030038</b> | 94  | 0.471 | 5.69E-06 | 5.55E-04 | contractile actin filament bundle assembly                       |
| <b>GO:0043149</b> | 94  | 0.471 | 5.69E-06 | 5.55E-04 | stress fiber assembly                                            |
| <b>GO:0014897</b> | 85  | 0.498 | 5.80E-06 | 5.64E-04 | striated muscle hypertrophy                                      |
| <b>GO:1902850</b> | 128 | 0.407 | 5.90E-06 | 5.73E-04 | microtubule cytoskeleton organization involved in mitosis        |
| <b>GO:0043588</b> | 316 | 0.257 | 5.93E-06 | 5.74E-04 | skin development                                                 |
| <b>GO:0050856</b> | 37  | 0.731 | 5.93E-06 | 5.74E-04 | regulation of T cell receptor signaling pathway                  |
| <b>GO:0002062</b> | 118 | 0.417 | 6.00E-06 | 5.80E-04 | chondrocyte differentiation                                      |
| <b>GO:0032608</b> | 43  | 0.763 | 6.01E-06 | 5.80E-04 | interferon-beta production                                       |
| <b>GO:0007568</b> | 302 | 0.264 | 6.10E-06 | 5.88E-04 | aging                                                            |
| <b>GO:0048285</b> | 438 | 0.219 | 6.53E-06 | 6.26E-04 | organelle fission                                                |
| <b>GO:0061387</b> | 107 | 0.439 | 6.58E-06 | 6.28E-04 | regulation of extent of cell growth                              |
| <b>GO:0003300</b> | 82  | 0.505 | 6.57E-06 | 6.28E-04 | cardiac muscle hypertrophy                                       |
| <b>GO:0002604</b> | 11  | 1.226 | 6.78E-06 | 6.46E-04 | regulation of dendritic cell antigen processing and presentation |
| <b>GO:2000401</b> | 58  | 0.621 | 6.84E-06 | 6.51E-04 | regulation of lymphocyte migration                               |
| <b>GO:0033045</b> | 77  | 0.520 | 6.89E-06 | 6.55E-04 | regulation of sister chromatid segregation                       |

|                   |     |       |          |          |                                                                          |
|-------------------|-----|-------|----------|----------|--------------------------------------------------------------------------|
| <b>GO:1990090</b> | 52  | 0.627 | 6.92E-06 | 6.57E-04 | cellular response to nerve growth factor stimulus                        |
| <b>GO:0035924</b> | 54  | 0.630 | 7.21E-06 | 6.82E-04 | cellular response to vascular endothelial growth factor stimulus         |
| <b>GO:0030516</b> | 92  | 0.471 | 7.30E-06 | 6.89E-04 | regulation of axon extension                                             |
| <b>GO:0098751</b> | 34  | 0.908 | 7.75E-06 | 7.30E-04 | bone cell development                                                    |
| <b>GO:1902882</b> | 82  | 0.503 | 7.93E-06 | 7.41E-04 | regulation of response to oxidative stress                               |
| <b>GO:0043368</b> | 35  | 0.782 | 7.92E-06 | 7.41E-04 | positive T cell selection                                                |
| <b>GO:0033032</b> | 28  | 0.829 | 7.91E-06 | 7.41E-04 | regulation of myeloid cell apoptotic process                             |
| <b>GO:0032731</b> | 15  | 1.067 | 7.91E-06 | 7.41E-04 | positive regulation of interleukin-1 beta production                     |
| <b>GO:0002717</b> | 23  | 0.879 | 7.97E-06 | 7.44E-04 | positive regulation of natural killer cell mediated immunity             |
| <b>GO:0043500</b> | 106 | 0.436 | 8.15E-06 | 7.60E-04 | muscle adaptation                                                        |
| <b>GO:2001204</b> | 11  | 1.152 | 8.28E-06 | 7.68E-04 | regulation of osteoclast development                                     |
| <b>GO:0034340</b> | 70  | 0.538 | 8.61E-06 | 7.98E-04 | response to type I interferon                                            |
| <b>GO:0002456</b> | 89  | 0.479 | 8.67E-06 | 8.01E-04 | T cell mediated immunity                                                 |
| <b>GO:0070304</b> | 166 | 0.348 | 8.69E-06 | 8.02E-04 | positive regulation of stress-activated protein kinase signaling cascade |
| <b>GO:2001236</b> | 149 | 0.368 | 8.74E-06 | 8.04E-04 | regulation of extrinsic apoptotic signaling pathway                      |
| <b>GO:0032606</b> | 117 | 0.422 | 8.73E-06 | 8.04E-04 | type I interferon production                                             |
| <b>GO:0050830</b> | 67  | 0.547 | 8.75E-06 | 8.04E-04 | defense response to Gram-positive bacterium                              |
| <b>GO:0071229</b> | 75  | 0.519 | 8.80E-06 | 8.07E-04 | cellular response to acid chemical                                       |
| <b>GO:0014911</b> | 37  | 0.708 | 9.17E-06 | 8.35E-04 | positive regulation of smooth muscle cell migration                      |
| <b>GO:0071230</b> | 68  | 0.544 | 9.25E-06 | 8.42E-04 | cellular response to amino acid stimulus                                 |
| <b>GO:0061448</b> | 263 | 0.275 | 9.40E-06 | 8.52E-04 | connective tissue development                                            |
| <b>GO:0062207</b> | 83  | 0.505 | 9.57E-06 | 8.67E-04 | regulation of pattern recognition receptor signaling pathway             |
| <b>GO:0018210</b> | 122 | 0.410 | 9.65E-06 | 8.72E-04 | peptidyl-threonine modification                                          |
| <b>GO:0032528</b> | 24  | 0.921 | 9.65E-06 | 8.72E-04 | microvillus organization                                                 |
| <b>GO:0007043</b> | 126 | 0.395 | 9.86E-06 | 8.89E-04 | cell-cell junction assembly                                              |
| <b>GO:0001938</b> | 92  | 0.460 | 9.90E-06 | 8.92E-04 | positive regulation of endothelial cell proliferation                    |
| <b>GO:0001822</b> | 280 | 0.266 | 1.01E-05 | 9.09E-04 | kidney development                                                       |
| <b>GO:0051988</b> | 12  | 1.316 | 1.01E-05 | 9.09E-04 | regulation of attachment of spindle microtubules to kinetochore          |
| <b>GO:0002279</b> | 46  | 0.658 | 1.02E-05 | 9.12E-04 | mast cell activation involved in immune response                         |

|                   |     |       |          |          |                                                                                                                                                  |
|-------------------|-----|-------|----------|----------|--------------------------------------------------------------------------------------------------------------------------------------------------|
| <b>GO:0052126</b> | 150 | 0.363 | 1.02E-05 | 9.14E-04 | movement in host environment                                                                                                                     |
| <b>GO:2000045</b> | 145 | 0.372 | 1.03E-05 | 9.21E-04 | regulation of G1/S transition of mitotic cell cycle                                                                                              |
| <b>GO:0045954</b> | 22  | 0.891 | 1.05E-05 | 9.33E-04 | positive regulation of natural killer cell mediated cytotoxicity                                                                                 |
| <b>GO:0006470</b> | 305 | 0.255 | 1.06E-05 | 9.38E-04 | protein dephosphorylation                                                                                                                        |
| <b>GO:0050922</b> | 54  | 0.601 | 1.07E-05 | 9.52E-04 | negative regulation of chemotaxis                                                                                                                |
| <b>GO:0090287</b> | 263 | 0.273 | 1.10E-05 | 9.76E-04 | regulation of cellular response to growth factor stimulus                                                                                        |
| <b>GO:0032479</b> | 115 | 0.420 | 1.14E-05 | 1.00E-03 | regulation of type I interferon production                                                                                                       |
| <b>GO:0002824</b> | 89  | 0.477 | 1.15E-05 | 1.02E-03 | positive regulation of adaptive immune response based on somatic recombination of immune receptors built from immunoglobulin superfamily domains |
| <b>GO:0032613</b> | 38  | 0.704 | 1.21E-05 | 1.06E-03 | interleukin-10 production                                                                                                                        |
| <b>GO:0051222</b> | 340 | 0.240 | 1.22E-05 | 1.08E-03 | positive regulation of protein transport                                                                                                         |
| <b>GO:1901990</b> | 399 | 0.222 | 1.23E-05 | 1.08E-03 | regulation of mitotic cell cycle phase transition                                                                                                |
| <b>GO:0050777</b> | 129 | 0.390 | 1.23E-05 | 1.08E-03 | negative regulation of immune response                                                                                                           |
| <b>GO:0071634</b> | 35  | 0.721 | 1.23E-05 | 1.08E-03 | regulation of transforming growth factor beta production                                                                                         |
| <b>GO:0072001</b> | 296 | 0.256 | 1.24E-05 | 1.08E-03 | renal system development                                                                                                                         |
| <b>GO:0045927</b> | 251 | 0.279 | 1.24E-05 | 1.08E-03 | positive regulation of growth                                                                                                                    |
| <b>GO:0001837</b> | 133 | 0.382 | 1.24E-05 | 1.08E-03 | epithelial to mesenchymal transition                                                                                                             |
| <b>GO:0002791</b> | 347 | 0.237 | 1.27E-05 | 1.11E-03 | regulation of peptide secretion                                                                                                                  |
| <b>GO:0032760</b> | 50  | 0.657 | 1.29E-05 | 1.12E-03 | positive regulation of tumor necrosis factor production                                                                                          |
| <b>GO:0022406</b> | 177 | 0.332 | 1.36E-05 | 1.18E-03 | membrane docking                                                                                                                                 |
| <b>GO:0071692</b> | 422 | 0.215 | 1.37E-05 | 1.19E-03 | protein localization to extracellular region                                                                                                     |
| <b>GO:0001954</b> | 50  | 0.616 | 1.37E-05 | 1.19E-03 | positive regulation of cell-matrix adhesion                                                                                                      |
| <b>GO:0002790</b> | 454 | 0.207 | 1.38E-05 | 1.19E-03 | peptide secretion                                                                                                                                |
| <b>GO:0032878</b> | 25  | 0.889 | 1.38E-05 | 1.19E-03 | regulation of establishment or maintenance of cell polarity                                                                                      |
| <b>GO:0060401</b> | 172 | 0.335 | 1.39E-05 | 1.20E-03 | cytosolic calcium ion transport                                                                                                                  |
| <b>GO:0030199</b> | 50  | 0.634 | 1.42E-05 | 1.22E-03 | collagen fibril organization                                                                                                                     |
| <b>GO:0001913</b> | 35  | 0.760 | 1.43E-05 | 1.23E-03 | T cell mediated cytotoxicity                                                                                                                     |
| <b>GO:0001763</b> | 195 | 0.312 | 1.44E-05 | 1.23E-03 | morphogenesis of a branching structure                                                                                                           |
| <b>GO:0032874</b> | 165 | 0.340 | 1.46E-05 | 1.25E-03 | positive regulation of stress-activated MAPK cascade                                                                                             |



|                   |     |       |          |          |                                                                             |
|-------------------|-----|-------|----------|----------|-----------------------------------------------------------------------------|
| <b>GO:0034599</b> | 280 | 0.262 | 1.48E-05 | 1.26E-03 | cellular response to oxidative stress                                       |
| <b>GO:1901136</b> | 177 | 0.328 | 1.51E-05 | 1.29E-03 | carbohydrate derivative catabolic process                                   |
| <b>GO:1905477</b> | 123 | 0.399 | 1.52E-05 | 1.29E-03 | positive regulation of protein localization to membrane                     |
| <b>GO:0002478</b> | 149 | 0.360 | 1.54E-05 | 1.31E-03 | antigen processing and presentation of exogenous peptide antigen            |
| <b>GO:0019933</b> | 171 | 0.332 | 1.55E-05 | 1.31E-03 | cAMP-mediated signaling                                                     |
| <b>GO:0009595</b> | 28  | 0.815 | 1.55E-05 | 1.31E-03 | detection of biotic stimulus                                                |
| <b>GO:0042552</b> | 130 | 0.383 | 1.58E-05 | 1.34E-03 | myelination                                                                 |
| <b>GO:0045670</b> | 62  | 0.560 | 1.61E-05 | 1.36E-03 | regulation of osteoclast differentiation                                    |
| <b>GO:0097306</b> | 84  | 0.478 | 1.62E-05 | 1.37E-03 | cellular response to alcohol                                                |
| <b>GO:0097581</b> | 79  | 0.492 | 1.65E-05 | 1.39E-03 | lamellipodium organization                                                  |
| <b>GO:0002761</b> | 113 | 0.410 | 1.68E-05 | 1.42E-03 | regulation of myeloid leukocyte differentiation                             |
| <b>GO:0032869</b> | 216 | 0.295 | 1.74E-05 | 1.46E-03 | cellular response to insulin stimulus                                       |
| <b>GO:0007009</b> | 99  | 0.436 | 1.75E-05 | 1.47E-03 | plasma membrane organization                                                |
| <b>GO:1904951</b> | 356 | 0.230 | 1.77E-05 | 1.48E-03 | positive regulation of establishment of protein localization                |
| <b>GO:0001101</b> | 131 | 0.377 | 1.77E-05 | 1.48E-03 | response to acid chemical                                                   |
| <b>GO:0051048</b> | 176 | 0.327 | 1.78E-05 | 1.49E-03 | negative regulation of secretion                                            |
| <b>GO:0051216</b> | 202 | 0.303 | 1.82E-05 | 1.51E-03 | cartilage development                                                       |
| <b>GO:0017015</b> | 110 | 0.412 | 1.82E-05 | 1.51E-03 | regulation of transforming growth factor beta receptor signaling pathway    |
| <b>GO:0010522</b> | 99  | 0.434 | 1.81E-05 | 1.51E-03 | regulation of calcium ion transport into cytosol                            |
| <b>GO:1903844</b> | 112 | 0.408 | 1.84E-05 | 1.53E-03 | regulation of cellular response to transforming growth factor beta stimulus |
| <b>GO:0010506</b> | 317 | 0.243 | 1.86E-05 | 1.54E-03 | regulation of autophagy                                                     |
| <b>GO:0032963</b> | 98  | 0.438 | 1.87E-05 | 1.54E-03 | collagen metabolic process                                                  |
| <b>GO:1990089</b> | 55  | 0.583 | 1.87E-05 | 1.54E-03 | response to nerve growth factor                                             |
| <b>GO:0046640</b> | 28  | 0.783 | 1.86E-05 | 1.54E-03 | regulation of alpha-beta T cell proliferation                               |
| <b>GO:0048144</b> | 80  | 0.483 | 1.88E-05 | 1.55E-03 | fibroblast proliferation                                                    |
| <b>GO:0051494</b> | 134 | 0.377 | 1.90E-05 | 1.56E-03 | negative regulation of cytoskeleton organization                            |
| <b>GO:0021543</b> | 166 | 0.333 | 1.96E-05 | 1.61E-03 | pallium development                                                         |
| <b>GO:0038065</b> | 13  | 1.023 | 2.11E-05 | 1.73E-03 | collagen-activated signaling pathway                                        |
| <b>GO:0060996</b> | 93  | 0.443 | 2.14E-05 | 1.74E-03 | dendritic spine development                                                 |

|                   |     |       |          |          |                                                                    |
|-------------------|-----|-------|----------|----------|--------------------------------------------------------------------|
| <b>GO:0050857</b> | 22  | 0.882 | 2.13E-05 | 1.74E-03 | positive regulation of antigen receptor-mediated signaling pathway |
| <b>GO:0006979</b> | 422 | 0.210 | 2.15E-05 | 1.75E-03 | response to oxidative stress                                       |
| <b>GO:0090316</b> | 177 | 0.323 | 2.23E-05 | 1.82E-03 | positive regulation of intracellular protein transport             |
| <b>GO:0050803</b> | 224 | 0.285 | 2.27E-05 | 1.84E-03 | regulation of synapse structure or activity                        |
| <b>GO:0007272</b> | 132 | 0.372 | 2.35E-05 | 1.91E-03 | ensheathment of neurons                                            |
| <b>GO:0008366</b> | 132 | 0.372 | 2.35E-05 | 1.91E-03 | axon ensheathment                                                  |
| <b>GO:0070266</b> | 35  | 0.741 | 2.39E-05 | 1.93E-03 | necroptotic process                                                |
| <b>GO:0046330</b> | 138 | 0.362 | 2.42E-05 | 1.95E-03 | positive regulation of JNK cascade                                 |
| <b>GO:0032653</b> | 37  | 0.689 | 2.45E-05 | 1.97E-03 | regulation of interleukin-10 production                            |
| <b>GO:0071352</b> | 13  | 1.011 | 2.45E-05 | 1.97E-03 | cellular response to interleukin-2                                 |
| <b>GO:0070228</b> | 50  | 0.623 | 2.48E-05 | 1.99E-03 | regulation of lymphocyte apoptotic process                         |
| <b>GO:0072659</b> | 260 | 0.264 | 2.49E-05 | 2.00E-03 | protein localization to plasma membrane                            |
| <b>GO:0006936</b> | 345 | 0.229 | 2.55E-05 | 2.04E-03 | muscle contraction                                                 |
| <b>GO:0002011</b> | 52  | 0.573 | 2.55E-05 | 2.04E-03 | morphogenesis of an epithelial sheet                               |
| <b>GO:1903532</b> | 298 | 0.246 | 2.57E-05 | 2.05E-03 | positive regulation of secretion by cell                           |
| <b>GO:0001933</b> | 388 | 0.216 | 2.59E-05 | 2.06E-03 | negative regulation of protein phosphorylation                     |
| <b>GO:0016358</b> | 230 | 0.280 | 2.62E-05 | 2.09E-03 | dendrite development                                               |
| <b>GO:0051099</b> | 179 | 0.317 | 2.65E-05 | 2.10E-03 | positive regulation of binding                                     |
| <b>GO:0001780</b> | 17  | 1.028 | 2.68E-05 | 2.12E-03 | neutrophil homeostasis                                             |
| <b>GO:0019883</b> | 14  | 1.046 | 2.69E-05 | 2.13E-03 | antigen processing and presentation of endogenous antigen          |
| <b>GO:1904062</b> | 325 | 0.235 | 2.79E-05 | 2.21E-03 | regulation of cation transmembrane transport                       |
| <b>GO:0032570</b> | 46  | 0.605 | 2.81E-05 | 2.22E-03 | response to progesterone                                           |
| <b>GO:0034110</b> | 25  | 0.807 | 2.88E-05 | 2.27E-03 | regulation of homotypic cell-cell adhesion                         |
| <b>GO:0048145</b> | 79  | 0.475 | 2.88E-05 | 2.27E-03 | regulation of fibroblast proliferation                             |
| <b>GO:0050708</b> | 317 | 0.238 | 2.89E-05 | 2.27E-03 | regulation of protein secretion                                    |
| <b>GO:0050807</b> | 215 | 0.287 | 2.89E-05 | 2.27E-03 | regulation of synapse organization                                 |
| <b>GO:0042326</b> | 425 | 0.206 | 2.93E-05 | 2.30E-03 | negative regulation of phosphorylation                             |
| <b>GO:0070588</b> | 307 | 0.241 | 2.95E-05 | 2.32E-03 | calcium ion transmembrane transport                                |
| <b>GO:0051770</b> | 15  | 1.197 | 2.96E-05 | 2.32E-03 | positive regulation of nitric-oxide synthase biosynthetic process  |

|                   |     |       |          |          |                                                                             |
|-------------------|-----|-------|----------|----------|-----------------------------------------------------------------------------|
| <b>GO:0032648</b> | 41  | 0.707 | 2.96E-05 | 2.32E-03 | regulation of interferon-beta production                                    |
| <b>GO:1903169</b> | 144 | 0.352 | 2.99E-05 | 2.34E-03 | regulation of calcium ion transmembrane transport                           |
| <b>GO:1901224</b> | 75  | 0.493 | 3.02E-05 | 2.36E-03 | positive regulation of NIK/NF-kappaB signaling                              |
| <b>GO:0070527</b> | 59  | 0.544 | 3.04E-05 | 2.37E-03 | platelet aggregation                                                        |
| <b>GO:0014015</b> | 75  | 0.488 | 3.07E-05 | 2.38E-03 | positive regulation of gliogenesis                                          |
| <b>GO:1904377</b> | 63  | 0.531 | 3.07E-05 | 2.38E-03 | positive regulation of protein localization to cell periphery               |
| <b>GO:1904019</b> | 98  | 0.419 | 3.10E-05 | 2.41E-03 | epithelial cell apoptotic process                                           |
| <b>GO:0003170</b> | 60  | 0.546 | 3.11E-05 | 2.41E-03 | heart valve development                                                     |
| <b>GO:0002287</b> | 60  | 0.543 | 3.16E-05 | 2.44E-03 | alpha-beta T cell activation involved in immune response                    |
| <b>GO:0002293</b> | 60  | 0.543 | 3.16E-05 | 2.44E-03 | alpha-beta T cell differentiation involved in immune response               |
| <b>GO:0035592</b> | 417 | 0.206 | 3.19E-05 | 2.46E-03 | establishment of protein localization to extracellular region               |
| <b>GO:0032486</b> | 14  | 1.080 | 3.20E-05 | 2.46E-03 | Rap protein signal transduction                                             |
| <b>GO:0048705</b> | 236 | 0.272 | 3.30E-05 | 2.54E-03 | skeletal system morphogenesis                                               |
| <b>GO:0050931</b> | 35  | 0.722 | 3.31E-05 | 2.54E-03 | pigment cell differentiation                                                |
| <b>GO:0043200</b> | 112 | 0.395 | 3.32E-05 | 2.55E-03 | response to amino acid                                                      |
| <b>GO:0036119</b> | 21  | 0.878 | 3.34E-05 | 2.56E-03 | response to platelet-derived growth factor                                  |
| <b>GO:0009306</b> | 416 | 0.206 | 3.37E-05 | 2.58E-03 | protein secretion                                                           |
| <b>GO:0007091</b> | 54  | 0.571 | 3.38E-05 | 2.58E-03 | metaphase/anaphase transition of mitotic cell cycle                         |
| <b>GO:0010965</b> | 54  | 0.571 | 3.38E-05 | 2.58E-03 | regulation of mitotic sister chromatid separation                           |
| <b>GO:0071695</b> | 224 | 0.279 | 3.40E-05 | 2.59E-03 | anatomical structure maturation                                             |
| <b>GO:0060337</b> | 67  | 0.512 | 3.48E-05 | 2.64E-03 | type I interferon signaling pathway                                         |
| <b>GO:0071357</b> | 67  | 0.512 | 3.48E-05 | 2.64E-03 | cellular response to type I interferon                                      |
| <b>GO:0002294</b> | 59  | 0.545 | 3.50E-05 | 2.65E-03 | CD4-positive, alpha-beta T cell differentiation involved in immune response |
| <b>GO:2000108</b> | 25  | 0.828 | 3.50E-05 | 2.65E-03 | positive regulation of leukocyte apoptotic process                          |
| <b>GO:0046638</b> | 46  | 0.610 | 3.56E-05 | 2.69E-03 | positive regulation of alpha-beta T cell differentiation                    |
| <b>GO:0051894</b> | 25  | 0.783 | 3.58E-05 | 2.70E-03 | positive regulation of focal adhesion assembly                              |
| <b>GO:0060562</b> | 323 | 0.232 | 3.60E-05 | 2.72E-03 | epithelial tube morphogenesis                                               |
| <b>GO:0030889</b> | 16  | 0.923 | 3.61E-05 | 2.72E-03 | negative regulation of B cell proliferation                                 |
| <b>GO:0051489</b> | 43  | 0.620 | 3.62E-05 | 2.72E-03 | regulation of filopodium assembly                                           |

|                   |     |       |          |          |                                                                          |
|-------------------|-----|-------|----------|----------|--------------------------------------------------------------------------|
| <b>GO:0036092</b> | 14  | 1.002 | 3.65E-05 | 2.74E-03 | phosphatidylinositol-3-phosphate biosynthetic process                    |
| <b>GO:2000379</b> | 94  | 0.432 | 3.66E-05 | 2.74E-03 | positive regulation of reactive oxygen species metabolic process         |
| <b>GO:0002688</b> | 106 | 0.404 | 3.69E-05 | 2.76E-03 | regulation of leukocyte chemotaxis                                       |
| <b>GO:0070098</b> | 77  | 0.478 | 3.70E-05 | 2.76E-03 | chemokine-mediated signaling pathway                                     |
| <b>GO:0033631</b> | 16  | 0.959 | 3.71E-05 | 2.77E-03 | cell-cell adhesion mediated by integrin                                  |
| <b>GO:0043502</b> | 83  | 0.454 | 3.72E-05 | 2.77E-03 | regulation of muscle adaptation                                          |
| <b>GO:0008544</b> | 362 | 0.218 | 3.75E-05 | 2.79E-03 | epidermis development                                                    |
| <b>GO:0060420</b> | 65  | 0.510 | 3.78E-05 | 2.80E-03 | regulation of heart growth                                               |
| <b>GO:0007156</b> | 119 | 0.377 | 3.83E-05 | 2.84E-03 | homophilic cell adhesion via plasma membrane adhesion molecules          |
| <b>GO:0003231</b> | 126 | 0.365 | 3.94E-05 | 2.91E-03 | cardiac ventricle development                                            |
| <b>GO:0007062</b> | 56  | 0.562 | 3.96E-05 | 2.92E-03 | sister chromatid cohesion                                                |
| <b>GO:0006333</b> | 168 | 0.319 | 3.96E-05 | 2.92E-03 | chromatin assembly or disassembly                                        |
| <b>GO:0060252</b> | 17  | 0.911 | 3.99E-05 | 2.93E-03 | positive regulation of glial cell proliferation                          |
| <b>GO:0050860</b> | 18  | 0.915 | 3.98E-05 | 2.93E-03 | negative regulation of T cell receptor signaling pathway                 |
| <b>GO:0043370</b> | 46  | 0.610 | 4.05E-05 | 2.97E-03 | regulation of CD4-positive, alpha-beta T cell differentiation            |
| <b>GO:0007178</b> | 327 | 0.229 | 4.05E-05 | 2.97E-03 | transmembrane receptor protein serine/threonine kinase signaling pathway |
| <b>GO:0150117</b> | 26  | 0.762 | 4.08E-05 | 2.99E-03 | positive regulation of cell-substrate junction organization              |
| <b>GO:0032868</b> | 273 | 0.251 | 4.09E-05 | 2.99E-03 | response to insulin                                                      |
| <b>GO:0055024</b> | 80  | 0.458 | 4.10E-05 | 3.00E-03 | regulation of cardiac muscle tissue development                          |
| <b>GO:0006338</b> | 185 | 0.305 | 4.19E-05 | 3.05E-03 | chromatin remodeling                                                     |
| <b>GO:0002367</b> | 82  | 0.465 | 4.22E-05 | 3.07E-03 | cytokine production involved in immune response                          |
| <b>GO:1904705</b> | 50  | 0.585 | 4.22E-05 | 3.07E-03 | regulation of vascular associated smooth muscle cell proliferation       |
| <b>GO:1990874</b> | 50  | 0.585 | 4.22E-05 | 3.07E-03 | vascular associated smooth muscle cell proliferation                     |
| <b>GO:0043506</b> | 84  | 0.447 | 4.45E-05 | 3.22E-03 | regulation of JUN kinase activity                                        |
| <b>GO:0070227</b> | 65  | 0.522 | 4.45E-05 | 3.22E-03 | lymphocyte apoptotic process                                             |
| <b>GO:1901184</b> | 87  | 0.442 | 4.48E-05 | 3.24E-03 | regulation of ERBB signaling pathway                                     |
| <b>GO:0043331</b> | 42  | 0.632 | 4.57E-05 | 3.30E-03 | response to dsRNA                                                        |
| <b>GO:1905475</b> | 187 | 0.303 | 4.59E-05 | 3.31E-03 | regulation of protein localization to membrane                           |

|                   |     |       |          |          |                                                               |
|-------------------|-----|-------|----------|----------|---------------------------------------------------------------|
| <b>GO:0048738</b> | 208 | 0.285 | 4.60E-05 | 3.32E-03 | cardiac muscle tissue development                             |
| <b>GO:0034332</b> | 64  | 0.508 | 4.66E-05 | 3.35E-03 | adherens junction organization                                |
| <b>GO:0001890</b> | 153 | 0.330 | 4.75E-05 | 3.41E-03 | placenta development                                          |
| <b>GO:0032615</b> | 39  | 0.661 | 4.77E-05 | 3.42E-03 | interleukin-12 production                                     |
| <b>GO:2000353</b> | 18  | 0.894 | 4.77E-05 | 3.42E-03 | positive regulation of endothelial cell apoptotic process     |
| <b>GO:0036120</b> | 20  | 0.887 | 4.84E-05 | 3.46E-03 | cellular response to platelet-derived growth factor stimulus  |
| <b>GO:0030890</b> | 41  | 0.675 | 4.92E-05 | 3.51E-03 | positive regulation of B cell proliferation                   |
| <b>GO:0002042</b> | 54  | 0.552 | 4.93E-05 | 3.52E-03 | cell migration involved in sprouting angiogenesis             |
| <b>GO:0044319</b> | 28  | 0.735 | 4.98E-05 | 3.54E-03 | wound healing, spreading of cells                             |
| <b>GO:0090505</b> | 28  | 0.735 | 4.98E-05 | 3.54E-03 | epiboly involved in wound healing                             |
| <b>GO:0090504</b> | 29  | 0.720 | 5.05E-05 | 3.58E-03 | epiboly                                                       |
| <b>GO:1990778</b> | 317 | 0.230 | 5.12E-05 | 3.62E-03 | protein localization to cell periphery                        |
| <b>GO:0070301</b> | 88  | 0.439 | 5.11E-05 | 3.62E-03 | cellular response to hydrogen peroxide                        |
| <b>GO:0032386</b> | 336 | 0.224 | 5.19E-05 | 3.67E-03 | regulation of intracellular transport                         |
| <b>GO:0003208</b> | 72  | 0.468 | 5.33E-05 | 3.76E-03 | cardiac ventricle morphogenesis                               |
| <b>GO:0018107</b> | 114 | 0.385 | 5.37E-05 | 3.79E-03 | peptidyl-threonine phosphorylation                            |
| <b>GO:1903670</b> | 67  | 0.493 | 5.37E-05 | 3.79E-03 | regulation of sprouting angiogenesis                          |
| <b>GO:0051491</b> | 30  | 0.702 | 5.40E-05 | 3.80E-03 | positive regulation of filopodium assembly                    |
| <b>GO:0002262</b> | 147 | 0.335 | 5.54E-05 | 3.89E-03 | myeloid cell homeostasis                                      |
| <b>GO:0043552</b> | 33  | 0.677 | 5.60E-05 | 3.93E-03 | positive regulation of phosphatidylinositol 3-kinase activity |
| <b>GO:0055021</b> | 59  | 0.524 | 5.70E-05 | 3.99E-03 | regulation of cardiac muscle tissue growth                    |
| <b>GO:0002448</b> | 47  | 0.609 | 5.71E-05 | 4.00E-03 | mast cell mediated immunity                                   |
| <b>GO:0050871</b> | 72  | 0.490 | 5.74E-05 | 4.01E-03 | positive regulation of B cell activation                      |
| <b>GO:0050663</b> | 61  | 0.516 | 5.79E-05 | 4.04E-03 | cytokine secretion                                            |
| <b>GO:0061138</b> | 181 | 0.300 | 5.89E-05 | 4.11E-03 | morphogenesis of a branching epithelium                       |
| <b>GO:0033157</b> | 251 | 0.257 | 5.91E-05 | 4.11E-03 | regulation of intracellular protein transport                 |
| <b>GO:0033028</b> | 32  | 0.698 | 5.96E-05 | 4.15E-03 | myeloid cell apoptotic process                                |
| <b>GO:0032755</b> | 53  | 0.561 | 6.02E-05 | 4.18E-03 | positive regulation of interleukin-6 production               |
| <b>GO:0045665</b> | 220 | 0.273 | 6.07E-05 | 4.21E-03 | negative regulation of neuron differentiation                 |

|                   |     |       |          |          |                                                                                       |
|-------------------|-----|-------|----------|----------|---------------------------------------------------------------------------------------|
| <b>GO:0060368</b> | 12  | 1.193 | 6.08E-05 | 4.21E-03 | regulation of Fc receptor mediated stimulatory signaling pathway                      |
| <b>GO:0034612</b> | 281 | 0.241 | 6.23E-05 | 4.31E-03 | response to tumor necrosis factor                                                     |
| <b>GO:1903510</b> | 110 | 0.388 | 6.26E-05 | 4.33E-03 | mucopolysaccharide metabolic process                                                  |
| <b>GO:1903522</b> | 282 | 0.240 | 6.30E-05 | 4.35E-03 | regulation of blood circulation                                                       |
| <b>GO:0036037</b> | 22  | 0.781 | 6.39E-05 | 4.41E-03 | CD8-positive, alpha-beta T cell activation                                            |
| <b>GO:0042698</b> | 71  | 0.469 | 6.44E-05 | 4.43E-03 | ovulation cycle                                                                       |
| <b>GO:0042771</b> | 45  | 0.592 | 6.45E-05 | 4.44E-03 | intrinsic apoptotic signaling pathway in response to DNA damage by p53 class mediator |
| <b>GO:0036035</b> | 17  | 0.948 | 6.63E-05 | 4.56E-03 | osteoclast development                                                                |
| <b>GO:0070102</b> | 19  | 0.884 | 6.67E-05 | 4.58E-03 | interleukin-6-mediated signaling pathway                                              |
| <b>GO:0060249</b> | 405 | 0.201 | 6.68E-05 | 4.58E-03 | anatomical structure homeostasis                                                      |
| <b>GO:0052548</b> | 358 | 0.213 | 6.79E-05 | 4.65E-03 | regulation of endopeptidase activity                                                  |
| <b>GO:0030203</b> | 155 | 0.323 | 6.81E-05 | 4.66E-03 | glycosaminoglycan metabolic process                                                   |
| <b>GO:0052547</b> | 383 | 0.206 | 6.86E-05 | 4.69E-03 | regulation of peptidase activity                                                      |
| <b>GO:0071786</b> | 16  | 0.920 | 6.90E-05 | 4.71E-03 | endoplasmic reticulum tubular network organization                                    |
| <b>GO:0034614</b> | 156 | 0.321 | 6.94E-05 | 4.73E-03 | cellular response to reactive oxygen species                                          |
| <b>GO:0051492</b> | 80  | 0.449 | 7.00E-05 | 4.77E-03 | regulation of stress fiber assembly                                                   |
| <b>GO:2000134</b> | 100 | 0.405 | 7.10E-05 | 4.83E-03 | negative regulation of G1/S transition of mitotic cell cycle                          |
| <b>GO:0050690</b> | 30  | 0.727 | 7.21E-05 | 4.90E-03 | regulation of defense response to virus by virus                                      |
| <b>GO:0033077</b> | 71  | 0.476 | 7.31E-05 | 4.96E-03 | T cell differentiation in thymus                                                      |
| <b>GO:0042692</b> | 346 | 0.216 | 7.34E-05 | 4.97E-03 | muscle cell differentiation                                                           |
| <b>GO:1901215</b> | 204 | 0.279 | 7.38E-05 | 4.99E-03 | negative regulation of neuron death                                                   |
| <b>GO:0071675</b> | 43  | 0.600 | 7.41E-05 | 5.01E-03 | regulation of mononuclear cell migration                                              |
| <b>GO:0016572</b> | 38  | 0.635 | 7.49E-05 | 5.05E-03 | histone phosphorylation                                                               |
| <b>GO:0008608</b> | 32  | 0.750 | 7.49E-05 | 5.05E-03 | attachment of spindle microtubules to kinetochore                                     |
| <b>GO:0048844</b> | 64  | 0.492 | 7.53E-05 | 5.07E-03 | artery morphogenesis                                                                  |
| <b>GO:0048247</b> | 50  | 0.563 | 7.56E-05 | 5.08E-03 | lymphocyte chemotaxis                                                                 |
| <b>GO:0050852</b> | 176 | 0.302 | 7.58E-05 | 5.09E-03 | T cell receptor signaling pathway                                                     |
| <b>GO:0014013</b> | 123 | 0.360 | 7.63E-05 | 5.12E-03 | regulation of gliogenesis                                                             |
| <b>GO:0001701</b> | 346 | 0.215 | 7.71E-05 | 5.16E-03 | in utero embryonic development                                                        |

|                   |     |       |          |          |                                                                         |
|-------------------|-----|-------|----------|----------|-------------------------------------------------------------------------|
| <b>GO:0006925</b> | 21  | 0.875 | 7.72E-05 | 5.16E-03 | inflammatory cell apoptotic process                                     |
| <b>GO:0001885</b> | 60  | 0.516 | 7.78E-05 | 5.18E-03 | endothelial cell development                                            |
| <b>GO:0003205</b> | 166 | 0.308 | 7.84E-05 | 5.22E-03 | cardiac chamber development                                             |
| <b>GO:0120034</b> | 99  | 0.397 | 7.95E-05 | 5.28E-03 | positive regulation of plasma membrane bounded cell projection assembly |
| <b>GO:0002686</b> | 42  | 0.622 | 8.08E-05 | 5.37E-03 | negative regulation of leukocyte migration                              |
| <b>GO:0006809</b> | 68  | 0.483 | 8.16E-05 | 5.42E-03 | nitric oxide biosynthetic process                                       |
| <b>GO:0031668</b> | 231 | 0.262 | 8.22E-05 | 5.45E-03 | cellular response to extracellular stimulus                             |
| <b>GO:1902904</b> | 127 | 0.355 | 8.32E-05 | 5.51E-03 | negative regulation of supramolecular fiber organization                |
| <b>GO:0048880</b> | 371 | 0.206 | 8.49E-05 | 5.61E-03 | sensory system development                                              |
| <b>GO:0050901</b> | 25  | 0.748 | 8.51E-05 | 5.62E-03 | leukocyte tethering or rolling                                          |
| <b>GO:1904037</b> | 30  | 0.689 | 8.57E-05 | 5.65E-03 | positive regulation of epithelial cell apoptotic process                |
| <b>GO:1903078</b> | 56  | 0.532 | 8.68E-05 | 5.72E-03 | positive regulation of protein localization to plasma membrane          |
| <b>GO:0042058</b> | 80  | 0.444 | 8.73E-05 | 5.74E-03 | regulation of epidermal growth factor receptor signaling pathway        |
| <b>GO:0033628</b> | 46  | 0.589 | 8.74E-05 | 5.74E-03 | regulation of cell adhesion mediated by integrin                        |
| <b>GO:0072006</b> | 143 | 0.331 | 8.77E-05 | 5.74E-03 | nephron development                                                     |
| <b>GO:0006027</b> | 61  | 0.509 | 8.79E-05 | 5.74E-03 | glycosaminoglycan catabolic process                                     |
| <b>GO:0014009</b> | 50  | 0.559 | 8.78E-05 | 5.74E-03 | glial cell proliferation                                                |
| <b>GO:1904407</b> | 41  | 0.621 | 8.90E-05 | 5.81E-03 | positive regulation of nitric oxide metabolic process                   |
| <b>GO:0060419</b> | 87  | 0.426 | 8.95E-05 | 5.83E-03 | heart growth                                                            |
| <b>GO:0006929</b> | 26  | 0.759 | 8.95E-05 | 5.83E-03 | substrate-dependent cell migration                                      |
| <b>GO:0032231</b> | 93  | 0.411 | 9.01E-05 | 5.86E-03 | regulation of actin filament bundle assembly                            |
| <b>GO:0001570</b> | 77  | 0.443 | 9.25E-05 | 6.01E-03 | vasculogenesis                                                          |
| <b>GO:0150063</b> | 366 | 0.206 | 9.69E-05 | 6.28E-03 | visual system development                                               |
| <b>GO:0045069</b> | 80  | 0.440 | 9.68E-05 | 6.28E-03 | regulation of viral genome replication                                  |
| <b>GO:0030856</b> | 137 | 0.335 | 9.73E-05 | 6.30E-03 | regulation of epithelial cell differentiation                           |
| <b>GO:1990253</b> | 10  | 1.099 | 9.81E-05 | 6.34E-03 | cellular response to leucine starvation                                 |
| <b>GO:1905564</b> | 14  | 0.942 | 9.83E-05 | 6.35E-03 | positive regulation of vascular endothelial cell proliferation          |
| <b>GO:0009896</b> | 407 | 0.195 | 9.85E-05 | 6.35E-03 | positive regulation of catabolic process                                |
| <b>GO:0034504</b> | 251 | 0.248 | 1.00E-04 | 6.45E-03 | protein localization to nucleus                                         |

|                   |     |       |          |          |                                                                   |
|-------------------|-----|-------|----------|----------|-------------------------------------------------------------------|
| <b>GO:0021987</b> | 110 | 0.371 | 1.01E-04 | 6.47E-03 | cerebral cortex development                                       |
| <b>GO:0002507</b> | 22  | 0.837 | 1.01E-04 | 6.51E-03 | tolerance induction                                               |
| <b>GO:0046209</b> | 73  | 0.461 | 1.03E-04 | 6.63E-03 | nitric oxide metabolic process                                    |
| <b>GO:0007548</b> | 263 | 0.241 | 1.05E-04 | 6.73E-03 | sex differentiation                                               |
| <b>GO:0007584</b> | 177 | 0.294 | 1.05E-04 | 6.74E-03 | response to nutrient                                              |
| <b>GO:0043201</b> | 13  | 1.029 | 1.05E-04 | 6.75E-03 | response to leucine                                               |
| <b>GO:0010717</b> | 82  | 0.436 | 1.06E-04 | 6.78E-03 | regulation of epithelial to mesenchymal transition                |
| <b>GO:0060043</b> | 41  | 0.608 | 1.06E-04 | 6.78E-03 | regulation of cardiac muscle cell proliferation                   |
| <b>GO:0001649</b> | 206 | 0.272 | 1.07E-04 | 6.84E-03 | osteoblast differentiation                                        |
| <b>GO:1903707</b> | 132 | 0.340 | 1.07E-04 | 6.84E-03 | negative regulation of hemopoiesis                                |
| <b>GO:0034105</b> | 32  | 0.660 | 1.07E-04 | 6.84E-03 | positive regulation of tissue remodeling                          |
| <b>GO:0010639</b> | 367 | 0.205 | 1.08E-04 | 6.87E-03 | negative regulation of organelle organization                     |
| <b>GO:1902743</b> | 42  | 0.595 | 1.10E-04 | 6.97E-03 | regulation of lamellipodium organization                          |
| <b>GO:0070168</b> | 27  | 0.739 | 1.13E-04 | 7.14E-03 | negative regulation of biomineral tissue development              |
| <b>GO:0110150</b> | 27  | 0.739 | 1.13E-04 | 7.14E-03 | negative regulation of biomineralization                          |
| <b>GO:2000116</b> | 219 | 0.264 | 1.13E-04 | 7.16E-03 | regulation of cysteine-type endopeptidase activity                |
| <b>GO:0022617</b> | 74  | 0.453 | 1.14E-04 | 7.22E-03 | extracellular matrix disassembly                                  |
| <b>GO:0006906</b> | 94  | 0.405 | 1.15E-04 | 7.28E-03 | vesicle fusion                                                    |
| <b>GO:1902806</b> | 158 | 0.310 | 1.16E-04 | 7.33E-03 | regulation of cell cycle G1/S phase transition                    |
| <b>GO:0001654</b> | 362 | 0.205 | 1.16E-04 | 7.33E-03 | eye development                                                   |
| <b>GO:0046620</b> | 95  | 0.397 | 1.17E-04 | 7.34E-03 | regulation of organ growth                                        |
| <b>GO:1902807</b> | 102 | 0.388 | 1.17E-04 | 7.35E-03 | negative regulation of cell cycle G1/S phase transition           |
| <b>GO:1903531</b> | 152 | 0.316 | 1.19E-04 | 7.43E-03 | negative regulation of secretion by cell                          |
| <b>GO:0002700</b> | 119 | 0.359 | 1.19E-04 | 7.43E-03 | regulation of production of molecular mediator of immune response |
| <b>GO:0042306</b> | 58  | 0.509 | 1.18E-04 | 7.43E-03 | regulation of protein import into nucleus                         |
| <b>GO:0042093</b> | 57  | 0.514 | 1.21E-04 | 7.56E-03 | T-helper cell differentiation                                     |
| <b>GO:0030071</b> | 51  | 0.543 | 1.22E-04 | 7.64E-03 | regulation of mitotic metaphase/anaphase transition               |
| <b>GO:2000107</b> | 45  | 0.587 | 1.23E-04 | 7.70E-03 | negative regulation of leukocyte apoptotic process                |
| <b>GO:0031331</b> | 345 | 0.209 | 1.24E-04 | 7.75E-03 | positive regulation of cellular catabolic process                 |
| <b>GO:0032655</b> | 37  | 0.642 | 1.25E-04 | 7.78E-03 | regulation of interleukin-12 production                           |



|                   |     |       |          |          |                                                                                  |
|-------------------|-----|-------|----------|----------|----------------------------------------------------------------------------------|
| <b>GO:0051279</b> | 78  | 0.440 | 1.27E-04 | 7.91E-03 | regulation of release of sequestered calcium ion into cytosol                    |
| <b>GO:0003007</b> | 248 | 0.245 | 1.29E-04 | 7.98E-03 | heart morphogenesis                                                              |
| <b>GO:0045137</b> | 217 | 0.262 | 1.29E-04 | 7.98E-03 | development of primary sexual characteristics                                    |
| <b>GO:0032355</b> | 133 | 0.334 | 1.29E-04 | 8.00E-03 | response to estradiol                                                            |
| <b>GO:0006939</b> | 103 | 0.379 | 1.29E-04 | 8.00E-03 | smooth muscle contraction                                                        |
| <b>GO:0031960</b> | 160 | 0.305 | 1.30E-04 | 8.03E-03 | response to corticosteroid                                                       |
| <b>GO:0050688</b> | 66  | 0.480 | 1.31E-04 | 8.12E-03 | regulation of defense response to virus                                          |
| <b>GO:0046849</b> | 91  | 0.404 | 1.33E-04 | 8.19E-03 | bone remodeling                                                                  |
| <b>GO:0042130</b> | 53  | 0.530 | 1.36E-04 | 8.40E-03 | negative regulation of T cell proliferation                                      |
| <b>GO:0032740</b> | 14  | 0.923 | 1.38E-04 | 8.48E-03 | positive regulation of interleukin-17 production                                 |
| <b>GO:0030278</b> | 187 | 0.281 | 1.39E-04 | 8.55E-03 | regulation of ossification                                                       |
| <b>GO:0061383</b> | 49  | 0.534 | 1.40E-04 | 8.59E-03 | trabecula morphogenesis                                                          |
| <b>GO:2001237</b> | 99  | 0.387 | 1.40E-04 | 8.60E-03 | negative regulation of extrinsic apoptotic signaling pathway                     |
| <b>GO:0140056</b> | 168 | 0.297 | 1.41E-04 | 8.62E-03 | organelle localization by membrane tethering                                     |
| <b>GO:0070672</b> | 14  | 0.903 | 1.41E-04 | 8.63E-03 | response to interleukin-15                                                       |
| <b>GO:0006509</b> | 43  | 0.642 | 1.42E-04 | 8.69E-03 | membrane protein ectodomain proteolysis                                          |
| <b>GO:0007565</b> | 183 | 0.283 | 1.43E-04 | 8.72E-03 | female pregnancy                                                                 |
| <b>GO:0030048</b> | 137 | 0.328 | 1.43E-04 | 8.73E-03 | actin filament-based movement                                                    |
| <b>GO:0043281</b> | 196 | 0.275 | 1.44E-04 | 8.75E-03 | regulation of cysteine-type endopeptidase activity involved in apoptotic process |
| <b>GO:0071233</b> | 10  | 1.134 | 1.44E-04 | 8.75E-03 | cellular response to leucine                                                     |
| <b>GO:0043393</b> | 209 | 0.265 | 1.44E-04 | 8.77E-03 | regulation of protein binding                                                    |
| <b>GO:0033046</b> | 41  | 0.604 | 1.45E-04 | 8.81E-03 | negative regulation of sister chromatid segregation                              |
| <b>GO:0031650</b> | 13  | 0.909 | 1.46E-04 | 8.84E-03 | regulation of heat generation                                                    |
| <b>GO:0097696</b> | 139 | 0.325 | 1.53E-04 | 9.25E-03 | receptor signaling pathway via STAT                                              |
| <b>GO:0097300</b> | 42  | 0.605 | 1.53E-04 | 9.27E-03 | programmed necrotic cell death                                                   |
| <b>GO:0055017</b> | 80  | 0.430 | 1.55E-04 | 9.33E-03 | cardiac muscle tissue growth                                                     |
| <b>GO:1901987</b> | 430 | 0.185 | 1.55E-04 | 9.36E-03 | regulation of cell cycle phase transition                                        |
| <b>GO:0051985</b> | 42  | 0.592 | 1.56E-04 | 9.41E-03 | negative regulation of chromosome segregation                                    |
| <b>GO:0045429</b> | 40  | 0.606 | 1.57E-04 | 9.46E-03 | positive regulation of nitric oxide biosynthetic process                         |
| <b>GO:0061097</b> | 88  | 0.406 | 1.58E-04 | 9.50E-03 | regulation of protein tyrosine kinase activity                                   |
| <b>GO:0002756</b> | 33  | 0.646 | 1.61E-04 | 9.65E-03 | MyD88-independent toll-like receptor signaling pathway                           |

|                   |     |       |          |          |                                                      |
|-------------------|-----|-------|----------|----------|------------------------------------------------------|
| <b>GO:0097242</b> | 34  | 0.659 | 1.61E-04 | 9.65E-03 | amyloid-beta clearance                               |
| <b>GO:1901879</b> | 80  | 0.431 | 1.62E-04 | 9.70E-03 | regulation of protein depolymerization               |
| <b>GO:0006959</b> | 190 | 0.277 | 1.64E-04 | 9.83E-03 | humoral immune response                              |
| <b>GO:0007259</b> | 135 | 0.326 | 1.71E-04 | 1.02E-02 | receptor signaling pathway via JAK-STAT              |
| <b>GO:1905818</b> | 59  | 0.499 | 1.72E-04 | 1.03E-02 | regulation of chromosome separation                  |
| <b>GO:0016055</b> | 499 | 0.170 | 1.73E-04 | 1.03E-02 | Wnt signaling pathway                                |
| <b>GO:0032728</b> | 25  | 0.788 | 1.73E-04 | 1.03E-02 | positive regulation of interferon-beta production    |
| <b>GO:0070507</b> | 180 | 0.283 | 1.73E-04 | 1.03E-02 | regulation of microtubule cytoskeleton organization  |
| <b>GO:0042307</b> | 39  | 0.596 | 1.77E-04 | 1.06E-02 | positive regulation of protein import into nucleus   |
| <b>GO:0014855</b> | 64  | 0.479 | 1.78E-04 | 1.06E-02 | striated muscle cell proliferation                   |
| <b>GO:0032465</b> | 82  | 0.418 | 1.83E-04 | 1.08E-02 | regulation of cytokinesis                            |
| <b>GO:1901989</b> | 91  | 0.402 | 1.86E-04 | 1.10E-02 | positive regulation of cell cycle phase transition   |
| <b>GO:0007292</b> | 131 | 0.328 | 1.88E-04 | 1.11E-02 | female gamete generation                             |
| <b>GO:0046850</b> | 50  | 0.512 | 1.88E-04 | 1.11E-02 | regulation of bone remodeling                        |
| <b>GO:0032495</b> | 20  | 0.914 | 1.90E-04 | 1.12E-02 | response to muramyl dipeptide                        |
| <b>GO:0043270</b> | 265 | 0.231 | 1.91E-04 | 1.13E-02 | positive regulation of ion transport                 |
| <b>GO:0043030</b> | 55  | 0.502 | 1.91E-04 | 1.13E-02 | regulation of macrophage activation                  |
| <b>GO:0002371</b> | 11  | 1.083 | 1.93E-04 | 1.13E-02 | dendritic cell cytokine production                   |
| <b>GO:0033003</b> | 39  | 0.608 | 1.94E-04 | 1.14E-02 | regulation of mast cell activation                   |
| <b>GO:0048568</b> | 429 | 0.182 | 1.96E-04 | 1.15E-02 | embryonic organ development                          |
| <b>GO:0071356</b> | 263 | 0.232 | 1.97E-04 | 1.16E-02 | cellular response to tumor necrosis factor           |
| <b>GO:0003206</b> | 125 | 0.332 | 1.98E-04 | 1.16E-02 | cardiac chamber morphogenesis                        |
| <b>GO:0010742</b> | 33  | 0.647 | 1.99E-04 | 1.16E-02 | macrophage derived foam cell differentiation         |
| <b>GO:0090077</b> | 33  | 0.647 | 1.99E-04 | 1.16E-02 | foam cell differentiation                            |
| <b>GO:0003179</b> | 51  | 0.530 | 1.99E-04 | 1.16E-02 | heart valve morphogenesis                            |
| <b>GO:0060135</b> | 65  | 0.461 | 2.00E-04 | 1.17E-02 | maternal process involved in female pregnancy        |
| <b>GO:0060251</b> | 33  | 0.624 | 2.03E-04 | 1.18E-02 | regulation of glial cell proliferation               |
| <b>GO:1904375</b> | 115 | 0.351 | 2.06E-04 | 1.20E-02 | regulation of protein localization to cell periphery |
| <b>GO:2000404</b> | 41  | 0.595 | 2.06E-04 | 1.20E-02 | regulation of T cell migration                       |
| <b>GO:0048813</b> | 142 | 0.314 | 2.06E-04 | 1.20E-02 | dendrite morphogenesis                               |
| <b>GO:0061437</b> | 26  | 0.699 | 2.07E-04 | 1.20E-02 | renal system vasculature development                 |
| <b>GO:0061440</b> | 26  | 0.699 | 2.07E-04 | 1.20E-02 | kidney vasculature development                       |

|                   |     |       |          |          |                                                                                |
|-------------------|-----|-------|----------|----------|--------------------------------------------------------------------------------|
| <b>GO:0046641</b> | 19  | 0.819 | 2.07E-04 | 1.20E-02 | positive regulation of alpha-beta T cell proliferation                         |
| <b>GO:0007189</b> | 127 | 0.330 | 2.08E-04 | 1.21E-02 | adenylate cyclase-activating G protein-coupled receptor signaling pathway      |
| <b>GO:0002698</b> | 103 | 0.368 | 2.08E-04 | 1.21E-02 | negative regulation of immune effector process                                 |
| <b>GO:0085029</b> | 37  | 0.622 | 2.09E-04 | 1.21E-02 | extracellular matrix assembly                                                  |
| <b>GO:1902041</b> | 54  | 0.516 | 2.11E-04 | 1.22E-02 | regulation of extrinsic apoptotic signaling pathway via death domain receptors |
| <b>GO:2001057</b> | 76  | 0.430 | 2.11E-04 | 1.22E-02 | reactive nitrogen species metabolic process                                    |
| <b>GO:0002691</b> | 28  | 0.709 | 2.12E-04 | 1.22E-02 | regulation of cellular extravasation                                           |
| <b>GO:0010762</b> | 30  | 0.670 | 2.13E-04 | 1.23E-02 | regulation of fibroblast migration                                             |
| <b>GO:0002576</b> | 125 | 0.334 | 2.13E-04 | 1.23E-02 | platelet degranulation                                                         |
| <b>GO:0090594</b> | 11  | 0.985 | 2.14E-04 | 1.23E-02 | inflammatory response to wounding                                              |
| <b>GO:1903727</b> | 49  | 0.534 | 2.15E-04 | 1.24E-02 | positive regulation of phospholipid metabolic process                          |
| <b>GO:0003229</b> | 55  | 0.490 | 2.16E-04 | 1.24E-02 | ventricular cardiac muscle tissue development                                  |
| <b>GO:0033619</b> | 60  | 0.506 | 2.18E-04 | 1.25E-02 | membrane protein proteolysis                                                   |
| <b>GO:0044784</b> | 56  | 0.504 | 2.27E-04 | 1.30E-02 | metaphase/anaphase transition of cell cycle                                    |
| <b>GO:0051767</b> | 19  | 0.919 | 2.29E-04 | 1.31E-02 | nitric-oxide synthase biosynthetic process                                     |
| <b>GO:0051769</b> | 19  | 0.919 | 2.29E-04 | 1.31E-02 | regulation of nitric-oxide synthase biosynthetic process                       |
| <b>GO:0070757</b> | 11  | 1.001 | 2.29E-04 | 1.31E-02 | interleukin-35-mediated signaling pathway                                      |
| <b>GO:0006022</b> | 164 | 0.290 | 2.30E-04 | 1.31E-02 | aminoglycan metabolic process                                                  |
| <b>GO:0009913</b> | 257 | 0.231 | 2.31E-04 | 1.31E-02 | epidermal cell differentiation                                                 |
| <b>GO:0022612</b> | 123 | 0.334 | 2.32E-04 | 1.32E-02 | gland morphogenesis                                                            |
| <b>GO:0051225</b> | 99  | 0.378 | 2.33E-04 | 1.32E-02 | spindle assembly                                                               |
| <b>GO:0016050</b> | 320 | 0.208 | 2.35E-04 | 1.34E-02 | vesicle organization                                                           |
| <b>GO:0060349</b> | 114 | 0.345 | 2.39E-04 | 1.36E-02 | bone morphogenesis                                                             |
| <b>GO:0043116</b> | 14  | 0.849 | 2.43E-04 | 1.37E-02 | negative regulation of vascular permeability                                   |
| <b>GO:0003015</b> | 279 | 0.221 | 2.49E-04 | 1.40E-02 | heart process                                                                  |
| <b>GO:0043647</b> | 71  | 0.436 | 2.49E-04 | 1.40E-02 | inositol phosphate metabolic process                                           |
| <b>GO:0030318</b> | 26  | 0.743 | 2.49E-04 | 1.40E-02 | melanocyte differentiation                                                     |
| <b>GO:1903426</b> | 84  | 0.403 | 2.53E-04 | 1.42E-02 | regulation of reactive oxygen species biosynthetic process                     |
| <b>GO:0048146</b> | 48  | 0.532 | 2.53E-04 | 1.42E-02 | positive regulation of fibroblast proliferation                                |

|                   |     |       |          |          |                                                                     |
|-------------------|-----|-------|----------|----------|---------------------------------------------------------------------|
| <b>GO:0002755</b> | 35  | 0.667 | 2.53E-04 | 1.42E-02 | MyD88-dependent toll-like receptor signaling pathway                |
| <b>GO:0050707</b> | 48  | 0.526 | 2.56E-04 | 1.44E-02 | regulation of cytokine secretion                                    |
| <b>GO:0021955</b> | 35  | 0.618 | 2.56E-04 | 1.44E-02 | central nervous system neuron axonogenesis                          |
| <b>GO:1901186</b> | 31  | 0.661 | 2.58E-04 | 1.45E-02 | positive regulation of ERBB signaling pathway                       |
| <b>GO:0010591</b> | 30  | 0.666 | 2.60E-04 | 1.45E-02 | regulation of lamellipodium assembly                                |
| <b>GO:0038110</b> | 12  | 0.921 | 2.62E-04 | 1.46E-02 | interleukin-2-mediated signaling pathway                            |
| <b>GO:0031103</b> | 48  | 0.522 | 2.62E-04 | 1.46E-02 | axon regeneration                                                   |
| <b>GO:0006869</b> | 337 | 0.201 | 2.65E-04 | 1.47E-02 | lipid transport                                                     |
| <b>GO:0050000</b> | 76  | 0.425 | 2.67E-04 | 1.48E-02 | chromosome localization                                             |
| <b>GO:0007569</b> | 100 | 0.370 | 2.68E-04 | 1.49E-02 | cell aging                                                          |
| <b>GO:1903428</b> | 50  | 0.523 | 2.68E-04 | 1.49E-02 | positive regulation of reactive oxygen species biosynthetic process |
| <b>GO:0007143</b> | 30  | 0.665 | 2.76E-04 | 1.53E-02 | female meiotic nuclear division                                     |
| <b>GO:0044706</b> | 211 | 0.252 | 2.80E-04 | 1.55E-02 | multi-multicellular organism process                                |
| <b>GO:0001911</b> | 12  | 0.915 | 2.83E-04 | 1.57E-02 | negative regulation of leukocyte mediated cytotoxicity              |
| <b>GO:0071103</b> | 280 | 0.219 | 2.85E-04 | 1.58E-02 | DNA conformation change                                             |
| <b>GO:0003222</b> | 16  | 0.823 | 2.85E-04 | 1.58E-02 | ventricular trabecula myocardium morphogenesis                      |
| <b>GO:0032620</b> | 26  | 0.701 | 2.86E-04 | 1.58E-02 | interleukin-17 production                                           |
| <b>GO:0001914</b> | 24  | 0.736 | 2.86E-04 | 1.58E-02 | regulation of T cell mediated cytotoxicity                          |
| <b>GO:0061756</b> | 35  | 0.630 | 2.95E-04 | 1.63E-02 | leukocyte adhesion to vascular endothelial cell                     |
| <b>GO:0055010</b> | 48  | 0.507 | 2.96E-04 | 1.63E-02 | ventricular cardiac muscle tissue morphogenesis                     |
| <b>GO:0035666</b> | 29  | 0.666 | 2.96E-04 | 1.63E-02 | TRIF-dependent toll-like receptor signaling pathway                 |
| <b>GO:0071354</b> | 36  | 0.595 | 3.02E-04 | 1.66E-02 | cellular response to interleukin-6                                  |
| <b>GO:0070167</b> | 91  | 0.379 | 3.05E-04 | 1.68E-02 | regulation of biomineral tissue development                         |
| <b>GO:0110149</b> | 91  | 0.379 | 3.05E-04 | 1.68E-02 | regulation of biomineralization                                     |
| <b>GO:0045616</b> | 39  | 0.568 | 3.06E-04 | 1.68E-02 | regulation of keratinocyte differentiation                          |
| <b>GO:1901880</b> | 63  | 0.468 | 3.08E-04 | 1.68E-02 | negative regulation of protein depolymerization                     |
| <b>GO:0036473</b> | 80  | 0.412 | 3.09E-04 | 1.69E-02 | cell death in response to oxidative stress                          |
| <b>GO:0010592</b> | 20  | 0.808 | 3.11E-04 | 1.70E-02 | positive regulation of lamellipodium assembly                       |
| <b>GO:0031214</b> | 156 | 0.290 | 3.13E-04 | 1.71E-02 | biomineral tissue development                                       |
| <b>GO:0110148</b> | 156 | 0.290 | 3.13E-04 | 1.71E-02 | biomineralization                                                   |

|                   |     |       |          |          |                                                                 |
|-------------------|-----|-------|----------|----------|-----------------------------------------------------------------|
| <b>GO:0031663</b> | 54  | 0.513 | 3.13E-04 | 1.71E-02 | lipopolysaccharide-mediated signaling pathway                   |
| <b>GO:0061384</b> | 34  | 0.598 | 3.15E-04 | 1.71E-02 | heart trabecula morphogenesis                                   |
| <b>GO:1904646</b> | 35  | 0.652 | 3.15E-04 | 1.71E-02 | cellular response to amyloid-beta                               |
| <b>GO:0051303</b> | 75  | 0.423 | 3.15E-04 | 1.71E-02 | establishment of chromosome localization                        |
| <b>GO:0016239</b> | 65  | 0.452 | 3.22E-04 | 1.75E-02 | positive regulation of macroautophagy                           |
| <b>GO:0032886</b> | 224 | 0.243 | 3.23E-04 | 1.75E-02 | regulation of microtubule-based process                         |
| <b>GO:0098543</b> | 13  | 1.089 | 3.24E-04 | 1.75E-02 | detection of other organism                                     |
| <b>GO:0002718</b> | 63  | 0.468 | 3.24E-04 | 1.75E-02 | regulation of cytokine production involved in immune response   |
| <b>GO:0010596</b> | 49  | 0.510 | 3.31E-04 | 1.79E-02 | negative regulation of endothelial cell migration               |
| <b>GO:0007077</b> | 12  | 1.079 | 3.33E-04 | 1.80E-02 | mitotic nuclear envelope disassembly                            |
| <b>GO:0045124</b> | 42  | 0.537 | 3.36E-04 | 1.81E-02 | regulation of bone resorption                                   |
| <b>GO:0061037</b> | 26  | 0.685 | 3.44E-04 | 1.85E-02 | negative regulation of cartilage development                    |
| <b>GO:0019048</b> | 31  | 0.626 | 3.45E-04 | 1.86E-02 | modulation by virus of host process                             |
| <b>GO:0106027</b> | 84  | 0.394 | 3.47E-04 | 1.87E-02 | neuron projection organization                                  |
| <b>GO:0032660</b> | 24  | 0.721 | 3.50E-04 | 1.88E-02 | regulation of interleukin-17 production                         |
| <b>GO:0048066</b> | 45  | 0.538 | 3.51E-04 | 1.89E-02 | developmental pigmentation                                      |
| <b>GO:0008406</b> | 211 | 0.247 | 3.53E-04 | 1.89E-02 | gonad development                                               |
| <b>GO:1900407</b> | 73  | 0.424 | 3.53E-04 | 1.89E-02 | regulation of cellular response to oxidative stress             |
| <b>GO:0031623</b> | 107 | 0.346 | 3.57E-04 | 1.91E-02 | receptor internalization                                        |
| <b>GO:1900182</b> | 75  | 0.416 | 3.59E-04 | 1.92E-02 | positive regulation of protein localization to nucleus          |
| <b>GO:0051306</b> | 57  | 0.479 | 3.61E-04 | 1.93E-02 | mitotic sister chromatid separation                             |
| <b>GO:0010761</b> | 37  | 0.591 | 3.63E-04 | 1.93E-02 | fibroblast migration                                            |
| <b>GO:0034694</b> | 31  | 0.636 | 3.63E-04 | 1.93E-02 | response to prostaglandin                                       |
| <b>GO:0071361</b> | 13  | 0.932 | 3.64E-04 | 1.94E-02 | cellular response to ethanol                                    |
| <b>GO:0006323</b> | 187 | 0.263 | 3.66E-04 | 1.94E-02 | DNA packaging                                                   |
| <b>GO:0001558</b> | 396 | 0.181 | 3.67E-04 | 1.95E-02 | regulation of cell growth                                       |
| <b>GO:0043242</b> | 70  | 0.435 | 3.69E-04 | 1.96E-02 | negative regulation of protein-containing complex disassembly   |
| <b>GO:0048008</b> | 55  | 0.489 | 3.71E-04 | 1.97E-02 | platelet-derived growth factor receptor signaling pathway       |
| <b>GO:0010508</b> | 117 | 0.330 | 3.77E-04 | 1.99E-02 | positive regulation of autophagy                                |
| <b>GO:0008630</b> | 103 | 0.351 | 3.81E-04 | 2.02E-02 | intrinsic apoptotic signaling pathway in response to DNA damage |
| <b>GO:0010256</b> | 413 | 0.177 | 3.83E-04 | 2.02E-02 | endomembrane system organization                                |

|                   |     |       |          |          |                                                         |
|-------------------|-----|-------|----------|----------|---------------------------------------------------------|
| <b>GO:0030100</b> | 197 | 0.254 | 3.88E-04 | 2.05E-02 | regulation of endocytosis                               |
| <b>GO:1903201</b> | 62  | 0.457 | 3.93E-04 | 2.07E-02 | regulation of oxidative stress-induced cell death       |
| <b>GO:0045010</b> | 44  | 0.561 | 4.01E-04 | 2.11E-02 | actin nucleation                                        |
| <b>GO:0035313</b> | 15  | 0.865 | 4.04E-04 | 2.13E-02 | wound healing, spreading of epidermal cells             |
| <b>GO:0003018</b> | 161 | 0.280 | 4.07E-04 | 2.14E-02 | vascular process in circulatory system                  |
| <b>GO:0061098</b> | 55  | 0.480 | 4.09E-04 | 2.15E-02 | positive regulation of protein tyrosine kinase activity |
| <b>GO:0070106</b> | 11  | 1.051 | 4.14E-04 | 2.17E-02 | interleukin-27-mediated signaling pathway               |
| <b>GO:0001660</b> | 10  | 0.975 | 4.15E-04 | 2.17E-02 | fever generation                                        |
| <b>GO:0072012</b> | 24  | 0.694 | 4.16E-04 | 2.18E-02 | glomerulus vasculature development                      |
| <b>GO:0003418</b> | 24  | 0.684 | 4.18E-04 | 2.18E-02 | growth plate cartilage chondrocyte differentiation      |
| <b>GO:0051016</b> | 19  | 0.811 | 4.19E-04 | 2.19E-02 | barbed-end actin filament capping                       |
| <b>GO:0006937</b> | 157 | 0.283 | 4.22E-04 | 2.20E-02 | regulation of muscle contraction                        |
| <b>GO:0070306</b> | 31  | 0.635 | 4.24E-04 | 2.21E-02 | lens fiber cell differentiation                         |
| <b>GO:0010952</b> | 172 | 0.271 | 4.25E-04 | 2.21E-02 | positive regulation of peptidase activity               |
| <b>GO:0006026</b> | 65  | 0.441 | 4.25E-04 | 2.21E-02 | aminoglycan catabolic process                           |
| <b>GO:0051385</b> | 31  | 0.645 | 4.29E-04 | 2.23E-02 | response to mineralocorticoid                           |
| <b>GO:0043010</b> | 321 | 0.198 | 4.30E-04 | 2.23E-02 | camera-type eye development                             |
| <b>GO:0010611</b> | 56  | 0.478 | 4.34E-04 | 2.25E-02 | regulation of cardiac muscle hypertrophy                |
| <b>GO:1903900</b> | 128 | 0.314 | 4.36E-04 | 2.26E-02 | regulation of viral life cycle                          |
| <b>GO:0032958</b> | 42  | 0.539 | 4.39E-04 | 2.28E-02 | inositol phosphate biosynthetic process                 |
| <b>GO:0001773</b> | 26  | 0.739 | 4.41E-04 | 2.29E-02 | myeloid dendritic cell activation                       |
| <b>GO:1903978</b> | 21  | 0.739 | 4.45E-04 | 2.30E-02 | regulation of microglial cell activation                |
| <b>GO:0038061</b> | 161 | 0.279 | 4.52E-04 | 2.33E-02 | NIK/NF-kappaB signaling                                 |
| <b>GO:0090174</b> | 100 | 0.356 | 4.63E-04 | 2.39E-02 | organelle membrane fusion                               |
| <b>GO:0016601</b> | 34  | 0.590 | 4.69E-04 | 2.42E-02 | Rac protein signal transduction                         |
| <b>GO:0060760</b> | 54  | 0.489 | 4.70E-04 | 2.42E-02 | positive regulation of response to cytokine stimulus    |
| <b>GO:0014743</b> | 59  | 0.461 | 4.72E-04 | 2.43E-02 | regulation of muscle hypertrophy                        |
| <b>GO:0051146</b> | 273 | 0.213 | 4.78E-04 | 2.46E-02 | striated muscle cell differentiation                    |
| <b>GO:0098581</b> | 17  | 0.888 | 4.91E-04 | 2.52E-02 | detection of external biotic stimulus                   |
| <b>GO:2000241</b> | 151 | 0.284 | 4.93E-04 | 2.53E-02 | regulation of reproductive process                      |
| <b>GO:1904645</b> | 45  | 0.539 | 4.93E-04 | 2.53E-02 | response to amyloid-beta                                |
| <b>GO:1902117</b> | 72  | 0.418 | 4.95E-04 | 2.54E-02 | positive regulation of organelle assembly               |

|                   |     |       |          |          |                                                                       |
|-------------------|-----|-------|----------|----------|-----------------------------------------------------------------------|
| <b>GO:0072577</b> | 54  | 0.470 | 4.97E-04 | 2.54E-02 | endothelial cell apoptotic process                                    |
| <b>GO:0001764</b> | 157 | 0.278 | 5.04E-04 | 2.58E-02 | neuron migration                                                      |
| <b>GO:0062208</b> | 29  | 0.710 | 5.06E-04 | 2.58E-02 | positive regulation of pattern recognition receptor signaling pathway |
| <b>GO:0003177</b> | 21  | 0.712 | 5.07E-04 | 2.59E-02 | pulmonary valve development                                           |
| <b>GO:1901890</b> | 97  | 0.353 | 5.08E-04 | 2.59E-02 | positive regulation of cell junction assembly                         |
| <b>GO:0035335</b> | 97  | 0.354 | 5.10E-04 | 2.60E-02 | peptidyl-tyrosine dephosphorylation                                   |
| <b>GO:0030042</b> | 52  | 0.501 | 5.13E-04 | 2.61E-02 | actin filament depolymerization                                       |
| <b>GO:1903305</b> | 160 | 0.277 | 5.15E-04 | 2.62E-02 | regulation of regulated secretory pathway                             |
| <b>GO:0051497</b> | 21  | 0.798 | 5.20E-04 | 2.64E-02 | negative regulation of stress fiber assembly                          |
| <b>GO:0038095</b> | 112 | 0.331 | 5.26E-04 | 2.67E-02 | Fc-epsilon receptor signaling pathway                                 |
| <b>GO:0033622</b> | 22  | 0.735 | 5.27E-04 | 2.67E-02 | integrin activation                                                   |
| <b>GO:0051169</b> | 332 | 0.192 | 5.29E-04 | 2.68E-02 | nuclear transport                                                     |
| <b>GO:0030522</b> | 267 | 0.214 | 5.29E-04 | 2.68E-02 | intracellular receptor signaling pathway                              |
| <b>GO:0034764</b> | 196 | 0.250 | 5.30E-04 | 2.68E-02 | positive regulation of transmembrane transport                        |
| <b>GO:0032418</b> | 72  | 0.413 | 5.30E-04 | 2.68E-02 | lysosome localization                                                 |
| <b>GO:0051310</b> | 58  | 0.463 | 5.29E-04 | 2.68E-02 | metaphase plate congression                                           |
| <b>GO:0051984</b> | 28  | 0.702 | 5.30E-04 | 2.68E-02 | positive regulation of chromosome segregation                         |
| <b>GO:0043383</b> | 12  | 0.989 | 5.29E-04 | 2.68E-02 | negative T cell selection                                             |
| <b>GO:0043244</b> | 106 | 0.341 | 5.34E-04 | 2.69E-02 | regulation of protein-containing complex disassembly                  |
| <b>GO:0002730</b> | 10  | 1.073 | 5.38E-04 | 2.71E-02 | regulation of dendritic cell cytokine production                      |
| <b>GO:1903203</b> | 26  | 0.732 | 5.43E-04 | 2.73E-02 | regulation of oxidative stress-induced neuron death                   |
| <b>GO:0030224</b> | 34  | 0.639 | 5.44E-04 | 2.73E-02 | monocyte differentiation                                              |
| <b>GO:1903131</b> | 34  | 0.639 | 5.44E-04 | 2.73E-02 | mononuclear cell differentiation                                      |
| <b>GO:0007219</b> | 184 | 0.256 | 5.51E-04 | 2.76E-02 | Notch signaling pathway                                               |
| <b>GO:0016311</b> | 459 | 0.163 | 5.54E-04 | 2.78E-02 | dephosphorylation                                                     |
| <b>GO:0032722</b> | 36  | 0.612 | 5.58E-04 | 2.79E-02 | positive regulation of chemokine production                           |
| <b>GO:0031100</b> | 72  | 0.416 | 5.59E-04 | 2.79E-02 | animal organ regeneration                                             |
| <b>GO:2000249</b> | 38  | 0.569 | 5.59E-04 | 2.79E-02 | regulation of actin cytoskeleton reorganization                       |
| <b>GO:0043374</b> | 14  | 0.826 | 5.59E-04 | 2.79E-02 | CD8-positive, alpha-beta T cell differentiation                       |
| <b>GO:0007223</b> | 37  | 0.561 | 5.68E-04 | 2.83E-02 | Wnt signaling pathway, calcium modulating pathway                     |
| <b>GO:1904589</b> | 61  | 0.446 | 5.74E-04 | 2.86E-02 | regulation of protein import                                          |

|                   |     |       |          |          |                                                                           |
|-------------------|-----|-------|----------|----------|---------------------------------------------------------------------------|
| <b>GO:1901889</b> | 30  | 0.621 | 5.79E-04 | 2.88E-02 | negative regulation of cell junction assembly                             |
| <b>GO:0070741</b> | 40  | 0.543 | 5.82E-04 | 2.90E-02 | response to interleukin-6                                                 |
| <b>GO:0043507</b> | 72  | 0.406 | 5.84E-04 | 2.90E-02 | positive regulation of JUN kinase activity                                |
| <b>GO:0032330</b> | 47  | 0.502 | 5.97E-04 | 2.97E-02 | regulation of chondrocyte differentiation                                 |
| <b>GO:2001185</b> | 14  | 0.837 | 6.01E-04 | 2.98E-02 | regulation of CD8-positive, alpha-beta T cell activation                  |
| <b>GO:0002063</b> | 46  | 0.498 | 6.04E-04 | 3.00E-02 | chondrocyte development                                                   |
| <b>GO:0000186</b> | 55  | 0.572 | 4.20E-05 | 9.80E-03 | activation of MAPKK activity                                              |
| <b>GO:0032733</b> | 25  | 0.688 | 6.12E-04 | 3.03E-02 | positive regulation of interleukin-10 production                          |
| <b>GO:0120032</b> | 168 | 0.266 | 6.25E-04 | 3.09E-02 | regulation of plasma membrane bounded cell projection assembly            |
| <b>GO:0033048</b> | 39  | 0.555 | 6.27E-04 | 3.10E-02 | negative regulation of mitotic sister chromatid segregation               |
| <b>GO:0070265</b> | 49  | 0.502 | 6.33E-04 | 3.12E-02 | necrotic cell death                                                       |
| <b>GO:0002544</b> | 19  | 0.763 | 6.36E-04 | 3.14E-02 | chronic inflammatory response                                             |
| <b>GO:0031116</b> | 27  | 0.656 | 6.40E-04 | 3.16E-02 | positive regulation of microtubule polymerization                         |
| <b>GO:0032409</b> | 265 | 0.212 | 6.42E-04 | 3.16E-02 | regulation of transporter activity                                        |
| <b>GO:0048535</b> | 16  | 0.870 | 6.48E-04 | 3.19E-02 | lymph node development                                                    |
| <b>GO:0045742</b> | 29  | 0.640 | 6.55E-04 | 3.22E-02 | positive regulation of epidermal growth factor receptor signaling pathway |
| <b>GO:0090025</b> | 22  | 0.706 | 6.55E-04 | 3.22E-02 | regulation of monocyte chemotaxis                                         |
| <b>GO:0031345</b> | 177 | 0.259 | 6.58E-04 | 3.23E-02 | negative regulation of cell projection organization                       |
| <b>GO:0046546</b> | 137 | 0.293 | 6.60E-04 | 3.23E-02 | development of primary male sexual characteristics                        |
| <b>GO:0045639</b> | 90  | 0.366 | 6.59E-04 | 3.23E-02 | positive regulation of myeloid cell differentiation                       |
| <b>GO:0070570</b> | 30  | 0.627 | 6.60E-04 | 3.23E-02 | regulation of neuron projection regeneration                              |
| <b>GO:0035455</b> | 18  | 0.756 | 6.60E-04 | 3.23E-02 | response to interferon-alpha                                              |
| <b>GO:0030834</b> | 49  | 0.506 | 6.63E-04 | 3.24E-02 | regulation of actin filament depolymerization                             |
| <b>GO:0002886</b> | 53  | 0.470 | 6.71E-04 | 3.28E-02 | regulation of myeloid leukocyte mediated immunity                         |
| <b>GO:0090630</b> | 82  | 0.384 | 6.73E-04 | 3.29E-02 | activation of GTPase activity                                             |
| <b>GO:0002467</b> | 15  | 0.915 | 6.81E-04 | 3.32E-02 | germinal center formation                                                 |
| <b>GO:0007612</b> | 146 | 0.284 | 6.88E-04 | 3.35E-02 | learning                                                                  |
| <b>GO:0045840</b> | 53  | 0.470 | 6.93E-04 | 3.36E-02 | positive regulation of mitotic nuclear division                           |
| <b>GO:0071677</b> | 23  | 0.706 | 6.92E-04 | 3.36E-02 | positive regulation of mononuclear cell migration                         |
| <b>GO:0031498</b> | 21  | 0.765 | 7.00E-04 | 3.40E-02 | chromatin disassembly                                                     |



|                   |     |       |          |          |                                                                                      |
|-------------------|-----|-------|----------|----------|--------------------------------------------------------------------------------------|
| <b>GO:0006913</b> | 329 | 0.189 | 7.06E-04 | 3.42E-02 | nucleocytoplasmic transport                                                          |
| <b>GO:0010715</b> | 16  | 0.861 | 7.08E-04 | 3.43E-02 | regulation of extracellular matrix disassembly                                       |
| <b>GO:0030879</b> | 143 | 0.284 | 7.11E-04 | 3.44E-02 | mammary gland development                                                            |
| <b>GO:1902099</b> | 53  | 0.474 | 7.19E-04 | 3.48E-02 | regulation of metaphase/anaphase transition of cell cycle                            |
| <b>GO:0010876</b> | 370 | 0.178 | 7.24E-04 | 3.50E-02 | lipid localization                                                                   |
| <b>GO:0050765</b> | 21  | 0.776 | 7.42E-04 | 3.58E-02 | negative regulation of phagocytosis                                                  |
| <b>GO:0007623</b> | 208 | 0.235 | 7.44E-04 | 3.59E-02 | circadian rhythm                                                                     |
| <b>GO:0043550</b> | 63  | 0.429 | 7.52E-04 | 3.62E-02 | regulation of lipid kinase activity                                                  |
| <b>GO:0090218</b> | 37  | 0.560 | 7.52E-04 | 3.62E-02 | positive regulation of lipid kinase activity                                         |
| <b>GO:1903053</b> | 38  | 0.561 | 7.55E-04 | 3.63E-02 | regulation of extracellular matrix organization                                      |
| <b>GO:0033044</b> | 326 | 0.188 | 7.60E-04 | 3.65E-02 | regulation of chromosome organization                                                |
| <b>GO:0060491</b> | 170 | 0.260 | 7.60E-04 | 3.65E-02 | regulation of cell projection assembly                                               |
| <b>GO:0090049</b> | 38  | 0.540 | 7.64E-04 | 3.67E-02 | regulation of cell migration involved in sprouting angiogenesis                      |
| <b>GO:0008286</b> | 139 | 0.287 | 7.74E-04 | 3.71E-02 | insulin receptor signaling pathway                                                   |
| <b>GO:0045059</b> | 13  | 0.961 | 7.76E-04 | 3.72E-02 | positive thymic T cell selection                                                     |
| <b>GO:0044003</b> | 37  | 0.542 | 7.78E-04 | 3.72E-02 | modulation by symbiont of host process                                               |
| <b>GO:0048278</b> | 65  | 0.425 | 7.80E-04 | 3.73E-02 | vesicle docking                                                                      |
| <b>GO:0030512</b> | 72  | 0.398 | 7.84E-04 | 3.75E-02 | negative regulation of transforming growth factor beta receptor signaling pathway    |
| <b>GO:1903845</b> | 74  | 0.392 | 7.93E-04 | 3.78E-02 | negative regulation of cellular response to transforming growth factor beta stimulus |
| <b>GO:2000377</b> | 175 | 0.256 | 7.94E-04 | 3.78E-02 | regulation of reactive oxygen species metabolic process                              |
| <b>GO:0048678</b> | 73  | 0.394 | 7.94E-04 | 3.78E-02 | response to axon injury                                                              |
| <b>GO:0060142</b> | 28  | 0.641 | 7.96E-04 | 3.79E-02 | regulation of syncytium formation by plasma membrane fusion                          |
| <b>GO:0070669</b> | 14  | 0.862 | 7.97E-04 | 3.79E-02 | response to interleukin-2                                                            |
| <b>GO:0007492</b> | 77  | 0.381 | 8.17E-04 | 3.88E-02 | endoderm development                                                                 |
| <b>GO:0034162</b> | 25  | 0.748 | 8.17E-04 | 3.88E-02 | toll-like receptor 9 signaling pathway                                               |
| <b>GO:0050798</b> | 38  | 0.552 | 8.20E-04 | 3.89E-02 | activated T cell proliferation                                                       |
| <b>GO:0010977</b> | 148 | 0.278 | 8.23E-04 | 3.90E-02 | negative regulation of neuron projection development                                 |
| <b>GO:0030033</b> | 16  | 0.863 | 8.35E-04 | 3.95E-02 | microvillus assembly                                                                 |

|                   |     |       |          |          |                                                                            |
|-------------------|-----|-------|----------|----------|----------------------------------------------------------------------------|
| <b>GO:0043551</b> | 54  | 0.453 | 8.44E-04 | 3.99E-02 | regulation of phosphatidylinositol 3-kinase activity                       |
| <b>GO:0001782</b> | 28  | 0.665 | 8.55E-04 | 4.04E-02 | B cell homeostasis                                                         |
| <b>GO:0016241</b> | 167 | 0.260 | 8.56E-04 | 4.04E-02 | regulation of macroautophagy                                               |
| <b>GO:0034113</b> | 57  | 0.451 | 8.64E-04 | 4.07E-02 | heterotypic cell-cell adhesion                                             |
| <b>GO:0043297</b> | 61  | 0.426 | 8.71E-04 | 4.10E-02 | apical junction assembly                                                   |
| <b>GO:0006907</b> | 21  | 0.728 | 8.71E-04 | 4.10E-02 | pinocytosis                                                                |
| <b>GO:0034724</b> | 41  | 0.531 | 8.74E-04 | 4.11E-02 | DNA replication-independent nucleosome organization                        |
| <b>GO:0010878</b> | 16  | 0.784 | 8.97E-04 | 4.21E-02 | cholesterol storage                                                        |
| <b>GO:0045841</b> | 36  | 0.561 | 9.00E-04 | 4.22E-02 | negative regulation of mitotic metaphase/anaphase transition               |
| <b>GO:2000816</b> | 36  | 0.561 | 9.00E-04 | 4.22E-02 | negative regulation of mitotic sister chromatid separation                 |
| <b>GO:0072583</b> | 41  | 0.513 | 9.10E-04 | 4.26E-02 | clathrin-dependent endocytosis                                             |
| <b>GO:0008584</b> | 136 | 0.286 | 9.12E-04 | 4.27E-02 | male gonad development                                                     |
| <b>GO:0060047</b> | 270 | 0.203 | 9.25E-04 | 4.33E-02 | heart contraction                                                          |
| <b>GO:0045741</b> | 10  | 1.054 | 9.31E-04 | 4.35E-02 | positive regulation of epidermal growth factor-activated receptor activity |
| <b>GO:0062033</b> | 17  | 0.779 | 9.32E-04 | 4.35E-02 | positive regulation of mitotic sister chromatid segregation                |
| <b>GO:0098974</b> | 10  | 0.958 | 9.35E-04 | 4.37E-02 | postsynaptic actin cytoskeleton organization                               |
| <b>GO:0035723</b> | 13  | 0.823 | 9.44E-04 | 4.40E-02 | interleukin-15-mediated signaling pathway                                  |
| <b>GO:0071350</b> | 13  | 0.823 | 9.44E-04 | 4.40E-02 | cellular response to interleukin-15                                        |
| <b>GO:0043524</b> | 147 | 0.273 | 9.48E-04 | 4.41E-02 | negative regulation of neuron apoptotic process                            |
| <b>GO:0009991</b> | 482 | 0.152 | 9.59E-04 | 4.46E-02 | response to extracellular stimulus                                         |
| <b>GO:1902100</b> | 37  | 0.549 | 9.63E-04 | 4.47E-02 | negative regulation of metaphase/anaphase transition of cell cycle         |
| <b>GO:1905819</b> | 37  | 0.549 | 9.63E-04 | 4.47E-02 | negative regulation of chromosome separation                               |
| <b>GO:0043931</b> | 19  | 0.707 | 9.72E-04 | 4.51E-02 | ossification involved in bone maturation                                   |
| <b>GO:0030307</b> | 158 | 0.265 | 9.73E-04 | 4.51E-02 | positive regulation of cell growth                                         |
| <b>GO:0030032</b> | 62  | 0.424 | 9.83E-04 | 4.55E-02 | lamellipodium assembly                                                     |
| <b>GO:0051058</b> | 56  | 0.448 | 9.84E-04 | 4.55E-02 | negative regulation of small GTPase mediated signal transduction           |
| <b>GO:0006904</b> | 44  | 0.511 | 9.84E-04 | 4.55E-02 | vesicle docking involved in exocytosis                                     |
| <b>GO:0034111</b> | 15  | 0.805 | 9.84E-04 | 4.55E-02 | negative regulation of homotypic cell-cell adhesion                        |

|                   |     |       |          |          |                                                             |
|-------------------|-----|-------|----------|----------|-------------------------------------------------------------|
| <b>GO:0034123</b> | 21  | 0.833 | 9.84E-04 | 4.55E-02 | positive regulation of toll-like receptor signaling pathway |
| <b>GO:0097061</b> | 76  | 0.381 | 9.92E-04 | 4.58E-02 | dendritic spine organization                                |
| <b>GO:0043523</b> | 208 | 0.230 | 1.01E-03 | 4.64E-02 | regulation of neuron apoptotic process                      |
| <b>GO:0035051</b> | 146 | 0.274 | 1.01E-03 | 4.64E-02 | cardiocyte differentiation                                  |
| <b>GO:0010950</b> | 153 | 0.268 | 1.01E-03 | 4.67E-02 | positive regulation of endopeptidase activity               |
| <b>GO:0043044</b> | 74  | 0.385 | 1.03E-03 | 4.72E-02 | ATP-dependent chromatin remodeling                          |
| <b>GO:0008217</b> | 174 | 0.250 | 1.03E-03 | 4.72E-02 | regulation of blood pressure                                |
| <b>GO:1902751</b> | 30  | 0.646 | 1.04E-03 | 4.75E-02 | positive regulation of cell cycle G2/M phase transition     |
| <b>GO:0008306</b> | 79  | 0.372 | 1.04E-03 | 4.77E-02 | associative learning                                        |
| <b>GO:0017157</b> | 215 | 0.226 | 1.04E-03 | 4.78E-02 | regulation of exocytosis                                    |
| <b>GO:1903725</b> | 84  | 0.359 | 1.04E-03 | 4.78E-02 | regulation of phospholipid metabolic process                |
| <b>GO:0061614</b> | 45  | 0.488 | 1.05E-03 | 4.81E-02 | pri-miRNA transcription by RNA polymerase II                |
| <b>GO:0070232</b> | 31  | 0.620 | 1.05E-03 | 4.81E-02 | regulation of T cell apoptotic process                      |
| <b>GO:0007260</b> | 75  | 0.380 | 1.06E-03 | 4.83E-02 | tyrosine phosphorylation of STAT protein                    |
| <b>GO:0034142</b> | 34  | 0.592 | 1.06E-03 | 4.85E-02 | toll-like receptor 4 signaling pathway                      |
| <b>GO:0002709</b> | 59  | 0.432 | 1.07E-03 | 4.86E-02 | regulation of T cell mediated immunity                      |
| <b>GO:0060998</b> | 70  | 0.391 | 1.07E-03 | 4.87E-02 | regulation of dendritic spine development                   |
| <b>GO:0001569</b> | 31  | 0.573 | 1.07E-03 | 4.87E-02 | branching involved in blood vessel morphogenesis            |
| <b>GO:0046661</b> | 158 | 0.261 | 1.08E-03 | 4.90E-02 | male sex differentiation                                    |
| <b>GO:0001975</b> | 34  | 0.559 | 1.09E-03 | 4.96E-02 | response to amphetamine                                     |
| <b>GO:0010743</b> | 27  | 0.618 | 1.10E-03 | 4.98E-02 | regulation of macrophage derived foam cell differentiation  |

**Molecular functions in Genetic group 1 in the most efficient group.**

| <b>Go term</b>    | <b>Number of genes</b> | <b>LOR*</b> | <b>pvalue</b> | <b>padj</b> | <b>Molecular functions</b>                               |
|-------------------|------------------------|-------------|---------------|-------------|----------------------------------------------------------|
| <b>GO:0036312</b> | 10                     | 1.108       | 1.45E-06      | 2.38E-03    | phosphatidylinositol 3-kinase regulatory subunit binding |
| <b>GO:0023026</b> | 10                     | 1.089       | 6.87E-06      | 7.50E-03    | MHC class II protein complex binding                     |
| <b>GO:0016303</b> | 10                     | 1.038       | 1.79E-04      | 1.61E-02    | 1-phosphatidylinositol-3-kinase activity                 |
| <b>GO:0048407</b> | 11                     | 1.301       | 4.05E-10      | 1.74E-07    | platelet-derived growth factor binding                   |
| <b>GO:0035004</b> | 11                     | 1.035       | 5.37E-06      | 7.95E-03    | phosphatidylinositol 3-kinase activity                   |

|                   |    |       |          |          |                                                                         |
|-------------------|----|-------|----------|----------|-------------------------------------------------------------------------|
| <b>GO:0097493</b> | 11 | 1.035 | 8.94E-06 | 9.28E-03 | structural molecule activity conferring elasticity                      |
| <b>GO:0004115</b> | 11 | 0.967 | 2.55E-04 | 2.13E-02 | 3',5'-cyclic-AMP phosphodiesterase activity                             |
| <b>GO:0005522</b> | 11 | 0.981 | 7.18E-04 | 4.99E-02 | profilin binding                                                        |
| <b>GO:0031005</b> | 12 | 0.943 | 4.99E-04 | 3.81E-02 | filamin binding                                                         |
| <b>GO:0042834</b> | 13 | 1.026 | 3.53E-04 | 2.82E-02 | peptidoglycan binding                                                   |
| <b>GO:0017160</b> | 15 | 0.969 | 2.45E-04 | 2.07E-02 | Ral GTPase binding                                                      |
| <b>GO:0023023</b> | 16 | 1.011 | 2.99E-07 | 5.99E-04 | MHC protein complex binding                                             |
| <b>GO:0035173</b> | 17 | 0.916 | 5.81E-06 | 6.53E-03 | histone kinase activity                                                 |
| <b>GO:0008139</b> | 20 | 0.802 | 2.09E-04 | 1.82E-02 | nuclear localization sequence binding                                   |
| <b>GO:0050431</b> | 22 | 0.900 | 1.01E-04 | 1.03E-02 | transforming growth factor beta binding                                 |
| <b>GO:0043325</b> | 25 | 0.697 | 3.80E-04 | 3.01E-02 | phosphatidylinositol-3,4-bisphosphate binding                           |
| <b>GO:0042974</b> | 26 | 0.874 | 4.02E-07 | 7.54E-04 | retinoic acid receptor binding                                          |
| <b>GO:0042287</b> | 27 | 0.757 | 4.49E-06 | 5.69E-03 | MHC protein binding                                                     |
| <b>GO:0043236</b> | 27 | 0.671 | 4.62E-04 | 3.59E-02 | laminin binding                                                         |
| <b>GO:0071889</b> | 28 | 0.711 | 1.09E-04 | 1.08E-02 | 14-3-3 protein binding                                                  |
| <b>GO:0003823</b> | 29 | 0.710 | 6.31E-04 | 4.57E-02 | antigen binding                                                         |
| <b>GO:0043548</b> | 31 | 0.828 | 1.26E-07 | 2.93E-04 | phosphatidylinositol 3-kinase binding                                   |
| <b>GO:0043394</b> | 34 | 0.644 | 1.51E-04 | 1.37E-02 | proteoglycan binding                                                    |
| <b>GO:0042169</b> | 36 | 0.635 | 7.06E-06 | 7.61E-03 | SH2 domain binding                                                      |
| <b>GO:0005547</b> | 37 | 0.790 | 1.44E-07 | 3.18E-04 | phosphatidylinositol-3,4,5-trisphosphate binding                        |
| <b>GO:0030020</b> | 40 | 0.641 | 2.87E-06 | 4.25E-03 | extracellular matrix structural constituent conferring tensile strength |
| <b>GO:0001102</b> | 41 | 0.573 | 2.75E-04 | 2.26E-02 | RNA polymerase II activating transcription factor binding               |
| <b>GO:0004715</b> | 46 | 0.896 | 1.75E-12 | 1.26E-09 | non-membrane spanning protein tyrosine kinase activity                  |
| <b>GO:0042379</b> | 48 | 0.496 | 6.55E-04 | 4.70E-02 | chemokine receptor binding                                              |
| <b>GO:0045309</b> | 49 | 0.555 | 1.31E-04 | 1.25E-02 | protein phosphorylated amino acid binding                               |
| <b>GO:0050840</b> | 53 | 0.546 | 5.49E-06 | 6.53E-03 | extracellular matrix binding                                            |
| <b>GO:0004714</b> | 62 | 0.496 | 1.14E-04 | 1.12E-02 | transmembrane receptor protein tyrosine kinase activity                 |
| <b>GO:0005518</b> | 64 | 0.681 | 6.84E-09 | 2.11E-06 | collagen binding                                                        |
| <b>GO:0048365</b> | 66 | 0.620 | 8.51E-08 | 2.10E-04 | Rac GTPase binding                                                      |
| <b>GO:0001618</b> | 68 | 0.490 | 5.25E-06 | 6.47E-03 | virus receptor activity                                                 |
| <b>GO:0030971</b> | 68 | 0.479 | 1.24E-04 | 1.20E-02 | receptor tyrosine kinase binding                                        |
| <b>GO:0140272</b> | 69 | 0.482 | 6.07E-06 | 6.70E-03 | exogenous protein binding                                               |
| <b>GO:0003725</b> | 72 | 0.505 | 3.28E-06 | 4.42E-03 | double-stranded RNA binding                                             |
| <b>GO:0033613</b> | 74 | 0.511 | 1.39E-06 | 2.38E-03 | activating transcription factor binding                                 |

|                   |     |       |          |          |                                                |
|-------------------|-----|-------|----------|----------|------------------------------------------------|
| <b>GO:0038024</b> | 75  | 0.400 | 5.97E-04 | 4.38E-02 | cargo receptor activity                        |
| <b>GO:0005089</b> | 77  | 0.434 | 1.50E-04 | 1.37E-02 | Rho guanyl-nucleotide exchange factor activity |
| <b>GO:0019199</b> | 80  | 0.474 | 3.06E-06 | 4.25E-03 | transmembrane receptor protein kinase activity |
| <b>GO:0046332</b> | 80  | 0.473 | 3.02E-06 | 4.25E-03 | SMAD binding                                   |
| <b>GO:0003777</b> | 80  | 0.459 | 5.72E-06 | 6.53E-03 | microtubule motor activity                     |
| <b>GO:1990782</b> | 90  | 0.524 | 1.34E-07 | 3.05E-04 | protein tyrosine kinase binding                |
| <b>GO:0035258</b> | 91  | 0.404 | 1.46E-04 | 1.35E-02 | steroid hormone receptor binding               |
| <b>GO:0004896</b> | 94  | 0.424 | 4.64E-06 | 5.79E-03 | cytokine receptor activity                     |
| <b>GO:0004725</b> | 96  | 0.359 | 4.66E-04 | 3.59E-02 | protein tyrosine phosphatase activity          |
| <b>GO:1902936</b> | 101 | 0.389 | 1.04E-04 | 1.06E-02 | phosphatidylinositol biphosphate binding       |
| <b>GO:0140375</b> | 109 | 0.447 | 3.63E-07 | 6.98E-04 | immune receptor activity                       |
| <b>GO:0016922</b> | 110 | 0.402 | 2.98E-06 | 4.25E-03 | nuclear receptor binding                       |
| <b>GO:0019955</b> | 122 | 0.534 | 9.62E-10 | 3.73E-07 | cytokine binding                               |
| <b>GO:0044325</b> | 125 | 0.308 | 5.97E-04 | 4.38E-02 | ion channel binding                            |
| <b>GO:0005178</b> | 126 | 0.700 | 2.22E-01 | 4.79E-13 | integrin binding                               |
| <b>GO:0017124</b> | 127 | 0.552 | 1.26E-10 | 6.01E-08 | SH3 domain binding                             |
| <b>GO:0019838</b> | 129 | 0.384 | 1.70E-06 | 2.72E-03 | growth factor binding                          |
| <b>GO:0003774</b> | 132 | 0.448 | 4.25E-08 | 1.08E-04 | motor activity                                 |
| <b>GO:0005088</b> | 134 | 0.419 | 1.70E-07 | 3.66E-04 | Ras guanyl-nucleotide exchange factor activity |
| <b>GO:0004713</b> | 135 | 0.462 | 9.36E-09 | 2.78E-06 | protein tyrosine kinase activity               |
| <b>GO:0019903</b> | 135 | 0.350 | 5.57E-06 | 6.53E-03 | protein phosphatase binding                    |
| <b>GO:0070851</b> | 136 | 0.434 | 4.02E-08 | 1.05E-04 | growth factor receptor binding                 |
| <b>GO:1901981</b> | 152 | 0.432 | 1.55E-08 | 4.45E-06 | phosphatidylinositol phosphate binding         |
| <b>GO:0035257</b> | 152 | 0.352 | 1.83E-06 | 2.86E-03 | nuclear hormone receptor binding               |
| <b>GO:0005201</b> | 157 | 0.551 | 9.50E-13 | 9.10E-10 | extracellular matrix structural constituent    |
| <b>GO:0017048</b> | 171 | 0.488 | 2.39E-11 | 1.29E-08 | Rho GTPase binding                             |
| <b>GO:0004721</b> | 176 | 0.280 | 2.33E-04 | 2.01E-02 | phosphoprotein phosphatase activity            |
| <b>GO:0019902</b> | 180 | 0.307 | 4.43E-06 | 5.69E-03 | phosphatase binding                            |
| <b>GO:0051427</b> | 182 | 0.355 | 2.23E-07 | 4.69E-04 | hormone receptor binding                       |
| <b>GO:0051015</b> | 190 | 0.437 | 3.90E-10 | 1.74E-07 | actin filament binding                         |
| <b>GO:0005516</b> | 195 | 0.408 | 1.35E-09 | 4.30E-07 | calmodulin binding                             |
| <b>GO:0005539</b> | 199 | 0.336 | 2.59E-07 | 5.32E-04 | glycosaminoglycan binding                      |
| <b>GO:0005085</b> | 210 | 0.304 | 1.46E-06 | 2.38E-03 | guanyl-nucleotide exchange factor activity     |
| <b>GO:0035091</b> | 234 | 0.450 | 1.38E-12 | 1.11E-09 | phosphatidylinositol binding                   |
| <b>GO:0008017</b> | 236 | 0.324 | 9.05E-08 | 2.17E-04 | microtubule binding                            |
| <b>GO:0030246</b> | 237 | 0.250 | 1.36E-04 | 1.27E-02 | carbohydrate binding                           |

|                   |     |        |          |          |                                                                          |
|-------------------|-----|--------|----------|----------|--------------------------------------------------------------------------|
| <b>GO:0005096</b> | 242 | 0.511  | 1.00E-15 | 1.44E-12 | GTPase activator activity                                                |
| <b>GO:0005126</b> | 249 | 0.331  | 2.25E-08 | 6.26E-06 | cytokine receptor binding                                                |
| <b>GO:0001664</b> | 258 | 0.263  | 2.90E-06 | 4.25E-03 | G protein-coupled receptor binding                                       |
| <b>GO:0061629</b> | 265 | 0.230  | 2.08E-04 | 1.82E-02 | RNA polymerase II-specific DNA-binding transcription factor binding      |
| <b>GO:0030695</b> | 272 | 0.485  | 5.53E-02 | 9.53E-13 | GTPase regulator activity                                                |
| <b>GO:0060589</b> | 311 | 0.372  | 1.34E-12 | 8.25E-09 | nucleoside-triphosphatase regulator activity                             |
| <b>GO:0045296</b> | 313 | 0.496  | 8.69E-04 | 4.05E-02 | cadherin binding                                                         |
| <b>GO:0015631</b> | 321 | 0.210  | 2.04E-04 | 1.82E-02 | tubulin binding                                                          |
| <b>GO:0140297</b> | 336 | 0.223  | 5.59E-06 | 6.53E-03 | DNA-binding transcription factor binding                                 |
| <b>GO:0042578</b> | 355 | 0.188  | 4.48E-04 | 3.51E-02 | phosphoric ester hydrolase activity                                      |
| <b>GO:0016887</b> | 402 | 0.175  | 5.36E-04 | 4.05E-02 | ATPase activity                                                          |
| <b>GO:0017016</b> | 403 | 0.366  | 6.00E-14 | 6.46E-11 | Ras GTPase binding                                                       |
| <b>GO:0005543</b> | 408 | 0.405  | 1.54E-12 | 4.44E-13 | phospholipid binding                                                     |
| <b>GO:0003779</b> | 414 | 0.433  | 9.39E-04 | 4.05E-02 | actin binding                                                            |
| <b>GO:0031267</b> | 417 | 0.367  | 2.17E-14 | 2.67E-11 | small GTPase binding                                                     |
| <b>GO:0001216</b> | 420 | 0.206  | 2.97E-06 | 4.25E-03 | DNA-binding transcription activator activity                             |
| <b>GO:0001228</b> | 420 | 0.206  | 2.97E-06 | 4.25E-03 | DNA-binding transcription activator activity, RNA polymerase II-specific |
| <b>GO:0004674</b> | 430 | 0.300  | 1.02E-10 | 5.15E-08 | protein serine/threonine kinase activity                                 |
| <b>GO:0046982</b> | 451 | 0.247  | 2.40E-08 | 6.45E-06 | protein heterodimerization activity                                      |
| <b>GO:0008047</b> | 476 | 0.317  | 1.42E-12 | 1.11E-09 | enzyme activator activity                                                |
| <b>GO:0016831</b> | 34  | -0.594 | 7.15E-04 | 4.99E-02 | carboxy-lyase activity                                                   |
| <b>GO:0034062</b> | 41  | -0.538 | 7.03E-04 | 4.97E-02 | 5'-3' RNA polymerase activity                                            |
| <b>GO:0097747</b> | 41  | -0.538 | 7.03E-04 | 4.97E-02 | RNA polymerase activity                                                  |
| <b>GO:0051536</b> | 61  | -0.445 | 6.00E-04 | 4.38E-02 | iron-sulfur cluster binding                                              |
| <b>GO:0051540</b> | 61  | -0.445 | 6.00E-04 | 4.38E-02 | metal cluster binding                                                    |
| <b>GO:0000030</b> | 25  | -0.809 | 3.45E-04 | 2.78E-02 | mannosyltransferase activity                                             |
| <b>GO:0004519</b> | 116 | -0.339 | 2.90E-04 | 2.36E-02 | endonuclease activity                                                    |
| <b>GO:0009982</b> | 13  | -0.951 | 2.71E-04 | 2.25E-02 | pseudouridine synthase activity                                          |
| <b>GO:0008175</b> | 33  | -0.615 | 2.38E-04 | 2.03E-02 | tRNA methyltransferase activity                                          |
| <b>GO:0008320</b> | 19  | -0.809 | 1.33E-04 | 1.26E-02 | protein transmembrane transporter activity                               |
| <b>GO:0016783</b> | 11  | -1.041 | 1.07E-04 | 1.07E-02 | sulfurtransferase activity                                               |
| <b>GO:0004549</b> | 16  | -1.059 | 7.56E-06 | 7.95E-03 | tRNA-specific ribonuclease activity                                      |
| <b>GO:0008173</b> | 63  | -0.503 | 5.73E-06 | 6.53E-03 | RNA methyltransferase activity                                           |
| <b>GO:0016829</b> | 183 | -0.300 | 5.83E-06 | 6.53E-03 | lyase activity                                                           |

|                   |     |        |          |          |                                                                                     |
|-------------------|-----|--------|----------|----------|-------------------------------------------------------------------------------------|
| <b>GO:0140318</b> | 21  | -0.819 | 4.29E-06 | 5.61E-03 | protein transporter activity                                                        |
| <b>GO:0009055</b> | 101 | -0.412 | 3.99E-06 | 5.30E-03 | electron transfer activity                                                          |
| <b>GO:0016779</b> | 116 | -0.393 | 3.28E-06 | 4.42E-03 | nucleotidyltransferase activity                                                     |
| <b>GO:0016651</b> | 95  | -0.449 | 1.42E-06 | 2.38E-03 | oxidoreductase activity, acting on NAD(P)H                                          |
| <b>GO:0008168</b> | 202 | -0.312 | 1.09E-06 | 1.92E-03 | methyltransferase activity                                                          |
| <b>GO:0016741</b> | 212 | -0.304 | 1.09E-06 | 1.92E-03 | transferase activity, transferring one-carbon groups                                |
| <b>GO:0004518</b> | 190 | -0.323 | 1.01E-06 | 1.85E-03 | nuclease activity                                                                   |
| <b>GO:0015651</b> | 10  | -1.182 | 3.64E-07 | 6.98E-04 | quaternary ammonium group transmembrane transporter activity                        |
| <b>GO:0003735</b> | 155 | -0.453 | 1.15E-09 | 3.80E-07 | structural constituent of ribosome                                                  |
| <b>GO:0003954</b> | 38  | -0.959 | 1.08E-09 | 3.73E-07 | NADH dehydrogenase activity                                                         |
| <b>GO:0008137</b> | 38  | -0.959 | 1.08E-09 | 3.73E-07 | NADH dehydrogenase (ubiquinone) activity                                            |
| <b>GO:0050136</b> | 38  | -0.959 | 1.08E-09 | 3.73E-07 | NADH dehydrogenase (quinone) activity                                               |
| <b>GO:0016655</b> | 50  | -0.805 | 7.20E-10 | 2.96E-07 | oxidoreductase activity, acting on NAD(P)H, quinone or similar compound as acceptor |
| <b>GO:0140098</b> | 300 | -0.374 | 1.78E-11 | 1.02E-08 | catalytic activity, acting on RNA                                                   |
| <b>GO:0140101</b> | 119 | -0.599 | 5.86E-12 | 3.89E-09 | catalytic activity, acting on a tRNA                                                |

**Cellular components in Genetic group 1 in the most efficient group.**

| <b>Go term</b>    | <b>Number of genes</b> | <b>LOR*</b> | <b>pvalue</b> | <b>padj</b> | <b>Cellular components</b>                   |
|-------------------|------------------------|-------------|---------------|-------------|----------------------------------------------|
| <b>GO:0005743</b> | 435                    | -0.793      | 1.90E-57      | 1.03E-53    | mitochondrial inner membrane                 |
| <b>GO:0098798</b> | 239                    | -0.958      | 5.51E-52      | 1.50E-48    | mitochondrial protein complex                |
| <b>GO:0019866</b> | 492                    | -0.677      | 7.03E-46      | 1.27E-42    | organelle inner membrane                     |
| <b>GO:0005759</b> | 456                    | -0.675      | 1.01E-42      | 1.37E-39    | mitochondrial matrix                         |
| <b>GO:0000313</b> | 86                     | -1.131      | 1.52E-35      | 1.38E-32    | organellar ribosome                          |
| <b>GO:0005761</b> | 86                     | -1.131      | 1.52E-35      | 1.38E-32    | mitochondrial ribosome                       |
| <b>GO:0005925</b> | 400                    | 0.629       | 1.48E-34      | 1.15E-31    | focal adhesion                               |
| <b>GO:0030055</b> | 407                    | 0.619       | 5.30E-34      | 3.60E-31    | cell-substrate junction                      |
| <b>GO:0000315</b> | 56                     | -1.172      | 7.76E-28      | 4.21E-25    | organellar large ribosomal subunit           |
| <b>GO:0005762</b> | 56                     | -1.172      | 7.76E-28      | 4.21E-25    | mitochondrial large ribosomal subunit        |
| <b>GO:0098552</b> | 466                    | 0.511       | 3.28E-26      | 1.62E-23    | side of membrane                             |
| <b>GO:0098800</b> | 116                    | -0.957      | 1.36E-25      | 6.17E-23    | inner mitochondrial membrane protein complex |
| <b>GO:0009897</b> | 283                    | 0.565       | 3.58E-20      | 1.50E-17    | external side of plasma membrane             |
| <b>GO:0031252</b> | 398                    | 0.473       | 4.79E-20      | 1.86E-17    | cell leading edge                            |
| <b>GO:0098589</b> | 322                    | 0.504       | 8.65E-19      | 3.13E-16    | membrane region                              |

|                   |     |        |          |          |                                           |
|-------------------|-----|--------|----------|----------|-------------------------------------------|
| <b>GO:0098857</b> | 310 | 0.507  | 2.23E-18 | 7.57E-16 | membrane microdomain                      |
| <b>GO:0045121</b> | 309 | 0.507  | 2.84E-18 | 9.07E-16 | membrane raft                             |
| <b>GO:0015629</b> | 487 | 0.397  | 1.53E-17 | 4.62E-15 | actin cytoskeleton                        |
| <b>GO:0030667</b> | 277 | 0.512  | 6.32E-17 | 1.81E-14 | secretory granule membrane                |
| <b>GO:0070469</b> | 81  | -0.916 | 8.03E-17 | 2.18E-14 | respirasome                               |
| <b>GO:0098803</b> | 69  | -0.957 | 1.60E-15 | 4.14E-13 | respiratory chain complex                 |
| <b>GO:0030027</b> | 190 | 0.561  | 3.24E-14 | 8.00E-12 | lamellipodium                             |
| <b>GO:0005746</b> | 74  | -0.871 | 3.57E-14 | 8.42E-12 | mitochondrial respirasome                 |
| <b>GO:0062023</b> | 375 | 0.397  | 4.58E-14 | 1.04E-11 | collagen-containing extracellular matrix  |
| <b>GO:0031012</b> | 488 | 0.344  | 1.06E-13 | 2.30E-11 | extracellular matrix                      |
| <b>GO:0044391</b> | 182 | -0.533 | 3.56E-13 | 7.44E-11 | ribosomal subunit                         |
| <b>GO:0001726</b> | 168 | 0.570  | 7.80E-13 | 1.57E-10 | ruffle                                    |
| <b>GO:0005840</b> | 229 | -0.467 | 1.65E-12 | 3.21E-10 | ribosome                                  |
| <b>GO:0030139</b> | 277 | 0.412  | 1.75E-11 | 3.28E-09 | endocytic vesicle                         |
| <b>GO:0015934</b> | 115 | -0.607 | 3.02E-11 | 5.47E-09 | large ribosomal subunit                   |
| <b>GO:0043235</b> | 382 | 0.338  | 8.71E-11 | 1.53E-08 | receptor complex                          |
| <b>GO:0000775</b> | 190 | 0.479  | 1.41E-10 | 2.39E-08 | chromosome, centromeric region            |
| <b>GO:0005769</b> | 331 | 0.357  | 1.85E-10 | 3.04E-08 | early endosome                            |
| <b>GO:0098858</b> | 197 | 0.461  | 2.29E-10 | 3.66E-08 | actin-based cell projection               |
| <b>GO:0005911</b> | 417 | 0.315  | 2.53E-10 | 3.67E-08 | cell-cell junction                        |
| <b>GO:0005747</b> | 43  | -1.007 | 2.57E-10 | 3.67E-08 | mitochondrial respiratory chain complex I |
| <b>GO:0030964</b> | 43  | -1.007 | 2.57E-10 | 3.67E-08 | NADH dehydrogenase complex                |
| <b>GO:0045271</b> | 43  | -1.007 | 2.57E-10 | 3.67E-08 | respiratory chain complex I               |
| <b>GO:0019897</b> | 162 | 0.497  | 3.69E-10 | 5.04E-08 | extrinsic component of plasma membrane    |
| <b>GO:0045335</b> | 123 | 0.589  | 3.71E-10 | 5.04E-08 | phagocytic vesicle                        |
| <b>GO:0005938</b> | 304 | 0.363  | 5.59E-10 | 7.41E-08 | cell cortex                               |
| <b>GO:0030175</b> | 98  | 0.639  | 9.01E-10 | 1.17E-07 | filopodium                                |
| <b>GO:0070820</b> | 151 | 0.498  | 1.17E-09 | 1.47E-07 | tertiary granule                          |
| <b>GO:0005884</b> | 105 | 0.604  | 1.84E-09 | 2.27E-07 | actin filament                            |
| <b>GO:0032432</b> | 73  | 0.695  | 2.08E-09 | 2.52E-07 | actin filament bundle                     |
| <b>GO:0042641</b> | 77  | 0.675  | 2.78E-09 | 3.29E-07 | actomyosin                                |
| <b>GO:0005819</b> | 338 | 0.327  | 4.20E-09 | 4.85E-07 | spindle                                   |
| <b>GO:0000314</b> | 28  | -0.973 | 5.31E-09 | 5.89E-07 | organellar small ribosomal subunit        |
| <b>GO:0005763</b> | 28  | -0.973 | 5.31E-09 | 5.89E-07 | mitochondrial small ribosomal subunit     |
| <b>GO:0009898</b> | 151 | 0.478  | 1.10E-08 | 1.19E-06 | cytoplasmic side of plasma membrane       |
| <b>GO:0001725</b> | 67  | 0.689  | 1.48E-08 | 1.55E-06 | stress fiber                              |
| <b>GO:0097517</b> | 67  | 0.689  | 1.48E-08 | 1.55E-06 | contractile actin filament bundle         |
| <b>GO:0010008</b> | 443 | 0.273  | 1.65E-08 | 1.69E-06 | endosome membrane                         |
| <b>GO:0001772</b> | 37  | 1.049  | 2.15E-08 | 2.14E-06 | immunological synapse                     |



|                   |     |        |          |          |                                                            |
|-------------------|-----|--------|----------|----------|------------------------------------------------------------|
| <b>GO:0031304</b> | 40  | -0.838 | 2.21E-08 | 2.14E-06 | intrinsic component of mitochondrial inner membrane        |
| <b>GO:0031305</b> | 40  | -0.838 | 2.21E-08 | 2.14E-06 | integral component of mitochondrial inner membrane         |
| <b>GO:0098687</b> | 322 | 0.316  | 2.53E-08 | 2.41E-06 | chromosomal region                                         |
| <b>GO:0035579</b> | 86  | 0.617  | 2.60E-08 | 2.43E-06 | specific granule membrane                                  |
| <b>GO:0042581</b> | 151 | 0.463  | 3.09E-08 | 2.85E-06 | specific granule                                           |
| <b>GO:0043202</b> | 92  | 0.598  | 3.94E-08 | 3.57E-06 | lysosomal lumen                                            |
| <b>GO:0031901</b> | 133 | 0.476  | 5.28E-08 | 4.70E-06 | early endosome membrane                                    |
| <b>GO:0005874</b> | 399 | 0.276  | 5.97E-08 | 5.23E-06 | microtubule                                                |
| <b>GO:0042629</b> | 22  | 1.077  | 7.13E-08 | 6.15E-06 | mast cell granule                                          |
| <b>GO:0070821</b> | 66  | 0.651  | 7.49E-08 | 6.36E-06 | tertiary granule membrane                                  |
| <b>GO:0045177</b> | 375 | 0.280  | 8.96E-08 | 7.48E-06 | apical part of cell                                        |
| <b>GO:0005902</b> | 79  | 0.616  | 9.95E-08 | 8.19E-06 | microvillus                                                |
| <b>GO:0005775</b> | 158 | 0.435  | 1.02E-07 | 8.29E-06 | vacuolar lumen                                             |
| <b>GO:0002102</b> | 30  | 1.053  | 1.07E-07 | 8.58E-06 | podosome                                                   |
| <b>GO:0031234</b> | 88  | 0.571  | 1.37E-07 | 1.08E-05 | extrinsic component of cytoplasmic side of plasma membrane |
| <b>GO:0098562</b> | 177 | 0.403  | 1.53E-07 | 1.17E-05 | cytoplasmic side of membrane                               |
| <b>GO:0150034</b> | 285 | 0.314  | 1.53E-07 | 1.17E-05 | distal axon                                                |
| <b>GO:0034774</b> | 303 | 0.305  | 1.87E-07 | 1.41E-05 | secretory granule lumen                                    |
| <b>GO:0030427</b> | 174 | 0.398  | 1.97E-07 | 1.47E-05 | site of polarized growth                                   |
| <b>GO:0016323</b> | 212 | 0.360  | 2.19E-07 | 1.61E-05 | basolateral plasma membrane                                |
| <b>GO:0030426</b> | 171 | 0.398  | 2.66E-07 | 1.93E-05 | growth cone                                                |
| <b>GO:0042470</b> | 104 | 0.515  | 2.78E-07 | 1.96E-05 | melanosome                                                 |
| <b>GO:0048770</b> | 104 | 0.515  | 2.78E-07 | 1.96E-05 | pigment granule                                            |
| <b>GO:0005581</b> | 93  | 0.528  | 2.92E-07 | 2.03E-05 | collagen trimer                                            |
| <b>GO:0031983</b> | 309 | 0.297  | 2.95E-07 | 2.03E-05 | vesicle lumen                                              |
| <b>GO:0000776</b> | 132 | 0.454  | 3.12E-07 | 2.12E-05 | kinetochore                                                |
| <b>GO:0060205</b> | 307 | 0.296  | 3.44E-07 | 2.31E-05 | cytoplasmic vesicle lumen                                  |
| <b>GO:0098978</b> | 358 | 0.268  | 5.40E-07 | 3.58E-05 | glutamatergic synapse                                      |
| <b>GO:0032592</b> | 68  | -0.596 | 7.15E-07 | 4.68E-05 | integral component of mitochondrial membrane               |
| <b>GO:0098573</b> | 69  | -0.584 | 1.00E-06 | 6.47E-05 | intrinsic component of mitochondrial membrane              |
| <b>GO:0072686</b> | 106 | 0.493  | 1.13E-06 | 7.20E-05 | mitotic spindle                                            |
| <b>GO:0005871</b> | 52  | 0.697  | 1.20E-06 | 7.61E-05 | kinesin complex                                            |
| <b>GO:0005604</b> | 92  | 0.498  | 1.26E-06 | 7.66E-05 | basement membrane                                          |
| <b>GO:0005766</b> | 138 | 0.422  | 1.24E-06 | 7.66E-05 | primary lysosome                                           |
| <b>GO:0042582</b> | 138 | 0.422  | 1.24E-06 | 7.66E-05 | azurophil granule                                          |
| <b>GO:0031253</b> | 313 | 0.278  | 1.30E-06 | 7.86E-05 | cell projection membrane                                   |
| <b>GO:0030136</b> | 173 | 0.370  | 1.38E-06 | 8.24E-05 | clathrin-coated vesicle                                    |
| <b>GO:0005875</b> | 148 | 0.402  | 1.42E-06 | 8.41E-05 | microtubule associated complex                             |
| <b>GO:0098852</b> | 329 | 0.268  | 1.69E-06 | 9.77E-05 | lytic vacuole membrane                                     |
| <b>GO:1905368</b> | 92  | -0.505 | 1.69E-06 | 9.77E-05 | peptidase complex                                          |

|                   |     |        |          |          |                                                     |
|-------------------|-----|--------|----------|----------|-----------------------------------------------------|
| <b>GO:0005765</b> | 328 | 0.267  | 1.83E-06 | 1.04E-04 | lysosomal membrane                                  |
| <b>GO:0033643</b> | 15  | 1.053  | 2.54E-06 | 1.44E-04 | host cell part                                      |
| <b>GO:0000779</b> | 116 | 0.443  | 2.81E-06 | 1.57E-04 | condensed chromosome, centromeric region            |
| <b>GO:1990204</b> | 101 | -0.471 | 2.83E-06 | 1.57E-04 | oxidoreductase complex                              |
| <b>GO:0030496</b> | 170 | 0.366  | 2.87E-06 | 1.57E-04 | midbody                                             |
| <b>GO:0005758</b> | 76  | -0.552 | 2.88E-06 | 1.57E-04 | mitochondrial intermembrane space                   |
| <b>GO:0019898</b> | 288 | 0.278  | 3.13E-06 | 1.69E-04 | extrinsic component of membrane                     |
| <b>GO:0098685</b> | 85  | 0.504  | 3.39E-06 | 1.81E-04 | Schaffer collateral - CA1 synapse                   |
| <b>GO:0030684</b> | 73  | -0.532 | 3.46E-06 | 1.83E-04 | preribosome                                         |
| <b>GO:0000777</b> | 103 | 0.466  | 3.54E-06 | 1.85E-04 | condensed chromosome kinetochore                    |
| <b>GO:0030666</b> | 145 | 0.389  | 3.86E-06 | 2.00E-04 | endocytic vesicle membrane                          |
| <b>GO:0005774</b> | 381 | 0.239  | 4.12E-06 | 2.11E-04 | vacuolar membrane                                   |
| <b>GO:0016461</b> | 10  | 1.157  | 5.65E-06 | 2.87E-04 | unconventional myosin complex                       |
| <b>GO:0016324</b> | 310 | 0.260  | 6.16E-06 | 3.10E-04 | apical plasma membrane                              |
| <b>GO:0098644</b> | 19  | 0.956  | 8.71E-06 | 4.34E-04 | complex of collagen trimers                         |
| <b>GO:0031256</b> | 166 | 0.349  | 9.36E-06 | 4.62E-04 | leading edge membrane                               |
| <b>GO:0044853</b> | 108 | 0.424  | 1.22E-05 | 5.96E-04 | plasma membrane raft                                |
| <b>GO:0001891</b> | 26  | 0.860  | 1.32E-05 | 6.40E-04 | phagocytic cup                                      |
| <b>GO:0098636</b> | 34  | 0.733  | 1.39E-05 | 6.66E-04 | protein complex involved in cell adhesion           |
| <b>GO:0030687</b> | 23  | -0.846 | 1.78E-05 | 8.48E-04 | preribosome, large subunit precursor                |
| <b>GO:0033646</b> | 13  | 1.048  | 1.83E-05 | 8.58E-04 | host intracellular part                             |
| <b>GO:0043656</b> | 13  | 1.048  | 1.83E-05 | 8.58E-04 | host intracellular region                           |
| <b>GO:0120114</b> | 74  | -0.498 | 1.85E-05 | 8.61E-04 | Sm-like protein family complex                      |
| <b>GO:0030863</b> | 113 | 0.410  | 1.92E-05 | 8.82E-04 | cortical cytoskeleton                               |
| <b>GO:0005905</b> | 68  | 0.514  | 2.37E-05 | 1.08E-03 | clathrin-coated pit                                 |
| <b>GO:0097386</b> | 26  | 0.828  | 2.39E-05 | 1.08E-03 | glial cell projection                               |
| <b>GO:0005876</b> | 57  | 0.604  | 2.71E-05 | 1.22E-03 | spindle microtubule                                 |
| <b>GO:0034719</b> | 19  | -0.886 | 2.87E-05 | 1.28E-03 | SMN-Sm protein complex                              |
| <b>GO:0034399</b> | 133 | 0.363  | 3.33E-05 | 1.47E-03 | nuclear periphery                                   |
| <b>GO:0101003</b> | 53  | 0.556  | 3.69E-05 | 1.60E-03 | ficolin-1-rich granule membrane                     |
| <b>GO:0031970</b> | 84  | -0.459 | 3.69E-05 | 1.60E-03 | organelle envelope lumen                            |
| <b>GO:0005732</b> | 22  | -0.804 | 3.91E-05 | 1.69E-03 | small nucleolar ribonucleoprotein complex           |
| <b>GO:0016363</b> | 105 | 0.404  | 4.10E-05 | 1.75E-03 | nuclear matrix                                      |
| <b>GO:0000793</b> | 211 | 0.284  | 4.53E-05 | 1.92E-03 | condensed chromosome                                |
| <b>GO:0032587</b> | 90  | 0.441  | 4.81E-05 | 2.01E-03 | ruffle membrane                                     |
| <b>GO:0070069</b> | 25  | -0.777 | 4.79E-05 | 2.01E-03 | cytochrome complex                                  |
| <b>GO:0008305</b> | 31  | 0.702  | 6.59E-05 | 2.73E-03 | integrin complex                                    |
| <b>GO:0031314</b> | 14  | -0.935 | 7.42E-05 | 3.05E-03 | extrinsic component of mitochondrial inner membrane |
| <b>GO:0032154</b> | 53  | 0.556  | 7.76E-05 | 3.17E-03 | cleavage furrow                                     |

|                   |     |        |          |          |                                                               |
|-------------------|-----|--------|----------|----------|---------------------------------------------------------------|
| <b>GO:0101002</b> | 120 | 0.364  | 8.41E-05 | 3.38E-03 | ficolin-1-rich granule                                        |
| <b>GO:1904813</b> | 120 | 0.364  | 8.41E-05 | 3.38E-03 | ficolin-1-rich granule lumen                                  |
| <b>GO:0005753</b> | 18  | -0.844 | 8.74E-05 | 3.46E-03 | mitochondrial proton-transporting ATP synthase complex        |
| <b>GO:0045259</b> | 18  | -0.844 | 8.74E-05 | 3.46E-03 | proton-transporting ATP synthase complex                      |
| <b>GO:0044309</b> | 160 | 0.307  | 1.12E-04 | 4.40E-03 | neuron spine                                                  |
| <b>GO:0051233</b> | 33  | 0.757  | 1.17E-04 | 4.58E-03 | spindle midzone                                               |
| <b>GO:0032797</b> | 11  | -1.125 | 1.22E-04 | 4.71E-03 | SMN complex                                                   |
| <b>GO:1990023</b> | 12  | 1.015  | 1.24E-04 | 4.79E-03 | mitotic spindle midzone                                       |
| <b>GO:0000790</b> | 342 | 0.208  | 1.39E-04 | 5.31E-03 | nuclear chromatin                                             |
| <b>GO:0005838</b> | 22  | -0.762 | 1.75E-04 | 6.64E-03 | proteasome regulatory particle                                |
| <b>GO:0030665</b> | 102 | 0.370  | 1.84E-04 | 6.91E-03 | clathrin-coated vesicle membrane                              |
| <b>GO:0043197</b> | 158 | 0.299  | 1.84E-04 | 6.91E-03 | dendritic spine                                               |
| <b>GO:1990752</b> | 29  | 0.873  | 1.94E-04 | 7.23E-03 | microtubule end                                               |
| <b>GO:0042734</b> | 162 | 0.293  | 2.09E-04 | 7.73E-03 | presynaptic membrane                                          |
| <b>GO:0045178</b> | 50  | 0.537  | 2.26E-04 | 8.30E-03 | basal part of cell                                            |
| <b>GO:0005744</b> | 13  | -1.072 | 2.38E-04 | 8.67E-03 | TIM23 mitochondrial import inner membrane translocase complex |
| <b>GO:0017053</b> | 76  | 0.421  | 2.86E-04 | 1.04E-02 | transcription repressor complex                               |
| <b>GO:0030864</b> | 84  | 0.404  | 2.93E-04 | 1.05E-02 | cortical actin cytoskeleton                                   |
| <b>GO:0030914</b> | 12  | -0.973 | 3.07E-04 | 1.10E-02 | STAGA complex                                                 |
| <b>GO:0018995</b> | 66  | 0.448  | 3.45E-04 | 1.22E-02 | host cellular component                                       |
| <b>GO:0043657</b> | 66  | 0.448  | 3.45E-04 | 1.22E-02 | host cell                                                     |
| <b>GO:0097525</b> | 56  | -0.470 | 3.54E-04 | 1.24E-02 | spliceosomal snRNP complex                                    |
| <b>GO:0005583</b> | 11  | 1.037  | 4.07E-04 | 1.41E-02 | fibrillar collagen trimer                                     |
| <b>GO:0098643</b> | 11  | 1.037  | 4.07E-04 | 1.41E-02 | banded collagen fibril                                        |
| <b>GO:0099056</b> | 73  | 0.408  | 4.61E-04 | 1.58E-02 | integral component of presynaptic membrane                    |
| <b>GO:1902911</b> | 104 | 0.348  | 4.63E-04 | 1.58E-02 | protein kinase complex                                        |
| <b>GO:0030479</b> | 16  | 0.904  | 4.69E-04 | 1.58E-02 | actin cortical patch                                          |
| <b>GO:0061645</b> | 16  | 0.904  | 4.69E-04 | 1.58E-02 | endocytic patch                                               |
| <b>GO:0043292</b> | 233 | 0.230  | 5.01E-04 | 1.68E-02 | contractile fiber                                             |
| <b>GO:0005770</b> | 239 | 0.227  | 5.27E-04 | 1.76E-02 | late endosome                                                 |
| <b>GO:0035578</b> | 80  | 0.393  | 5.92E-04 | 1.94E-02 | azurophil granule lumen                                       |
| <b>GO:0071437</b> | 16  | 0.943  | 5.95E-04 | 1.94E-02 | invadopodium                                                  |
| <b>GO:0005665</b> | 13  | -0.884 | 5.92E-04 | 1.94E-02 | RNA polymerase II, core complex                               |
| <b>GO:0016591</b> | 76  | -0.394 | 5.96E-04 | 1.94E-02 | RNA polymerase II, holoenzyme                                 |
| <b>GO:0005750</b> | 10  | -0.947 | 6.20E-04 | 1.98E-02 | mitochondrial respiratory chain complex III                   |
| <b>GO:0015935</b> | 70  | -0.405 | 6.14E-04 | 1.98E-02 | small ribosomal subunit                                       |
| <b>GO:0045275</b> | 10  | -0.947 | 6.20E-04 | 1.98E-02 | respiratory chain complex III                                 |
| <b>GO:0031091</b> | 90  | 0.362  | 6.28E-04 | 1.99E-02 | platelet alpha granule                                        |

| GO:0005813                                                                                  | 500             | 0.155  | 6.48E-04 | 2.05E-02 | centrosome                                                  |
|---------------------------------------------------------------------------------------------|-----------------|--------|----------|----------|-------------------------------------------------------------|
| GO:0098799                                                                                  | 16              | -0.798 | 6.57E-04 | 2.06E-02 | outer mitochondrial membrane protein complex                |
| GO:0097504                                                                                  | 11              | -1.055 | 6.72E-04 | 2.10E-02 | Gemini of coiled bodies                                     |
| GO:0005788                                                                                  | 299             | 0.197  | 7.37E-04 | 2.28E-02 | endoplasmic reticulum lumen                                 |
| GO:0042101                                                                                  | 17              | 0.949  | 7.38E-04 | 2.28E-02 | T cell receptor complex                                     |
| GO:1902554                                                                                  | 84              | 0.370  | 8.27E-04 | 2.54E-02 | serine/threonine protein kinase complex                     |
| GO:0042383                                                                                  | 135             | 0.289  | 8.47E-04 | 2.58E-02 | sarcolemma                                                  |
| GO:0030532                                                                                  | 62              | -0.421 | 9.06E-04 | 2.75E-02 | small nuclear ribonucleoprotein complex                     |
| GO:0098802                                                                                  | 181             | 0.248  | 9.48E-04 | 2.86E-02 | plasma membrane signaling receptor complex                  |
| GO:0001931                                                                                  | 12              | 0.978  | 9.88E-04 | 2.95E-02 | uropod                                                      |
| GO:0031254                                                                                  | 12              | 0.978  | 9.88E-04 | 2.95E-02 | cell trailing edge                                          |
| GO:0009925                                                                                  | 34              | 0.581  | 1.00E-03 | 2.97E-02 | basal plasma membrane                                       |
| GO:0097449                                                                                  | 14              | 0.929  | 1.02E-03 | 3.00E-02 | astrocyte projection                                        |
| GO:0031527                                                                                  | 17              | 0.741  | 1.07E-03 | 3.13E-02 | filopodium membrane                                         |
| GO:0032153                                                                                  | 66              | 0.402  | 1.20E-03 | 3.49E-02 | cell division site                                          |
| GO:0098984                                                                                  | 349             | 0.175  | 1.20E-03 | 3.49E-02 | neuron to neuron synapse                                    |
| GO:0036019                                                                                  | 19              | 0.757  | 1.24E-03 | 3.57E-02 | endolysosome                                                |
| GO:0097060                                                                                  | 429             | 0.157  | 1.30E-03 | 3.74E-02 | synaptic membrane                                           |
| GO:0000307                                                                                  | 42              | 0.519  | 1.33E-03 | 3.81E-02 | cyclin-dependent protein kinase holoenzyme complex          |
| GO:0098793                                                                                  | 491             | 0.146  | 1.35E-03 | 3.85E-02 | presynapse                                                  |
| GO:0035577                                                                                  | 53              | 0.439  | 1.40E-03 | 3.95E-02 | azurophil granule membrane                                  |
| GO:0032009                                                                                  | 12              | 0.848  | 1.48E-03 | 4.17E-02 | early phagosome                                             |
| GO:0030016                                                                                  | 222             | 0.214  | 1.51E-03 | 4.23E-02 | myofibril                                                   |
| GO:0055029                                                                                  | 99              | -0.320 | 1.55E-03 | 4.33E-02 | nuclear DNA-directed RNA polymerase complex                 |
| GO:0044295                                                                                  | 28              | 0.614  | 1.60E-03 | 4.43E-02 | axonal growth cone                                          |
| GO:0030670                                                                                  | 67              | 0.394  | 1.65E-03 | 4.56E-02 | phagocytic vesicle membrane                                 |
| GO:0030904                                                                                  | 20              | 0.719  | 1.66E-03 | 4.56E-02 | retromer complex                                            |
| GO:0045277                                                                                  | 14              | -0.814 | 1.76E-03 | 4.80E-02 | respiratory chain complex IV                                |
| GO:0016327                                                                                  | 19              | 0.665  | 1.83E-03 | 4.97E-02 | apicolateral plasma membrane                                |
| <b>The significant biological processes in Genetic group 2 in the most efficient group.</b> |                 |        |          |          |                                                             |
| Go term                                                                                     | Number of genes | LOR*   | pvalue   | padj     | Biological process                                          |
| GO:0045047                                                                                  | 107             | 1.016  | 1.55E-18 | 7.43E-14 | protein targeting to ER                                     |
| GO:0006613                                                                                  | 98              | 1.103  | 2.57E-18 | 7.43E-14 | cotranslational protein targeting to membrane               |
| GO:0006614                                                                                  | 94              | 1.139  | 6.26E-18 | 1.21E-13 | SRP-dependent cotranslational protein targeting to membrane |
| GO:0006119                                                                                  | 121             | 0.803  | 6.69E-16 | 9.67E-12 | oxidative phosphorylation                                   |
| GO:0022900                                                                                  | 164             | 0.646  | 1.65E-15 | 1.91E-11 | electron transport chain                                    |
| GO:0006612                                                                                  | 188             | 0.603  | 7.84E-15 | 5.03E-11 | protein targeting to membrane                               |

|                   |     |        |          |          |                                                                     |
|-------------------|-----|--------|----------|----------|---------------------------------------------------------------------|
| <b>GO:0071346</b> | 146 | 0.670  | 6.33E-15 | 5.03E-11 | cellular response to interferon-gamma                               |
| <b>GO:0072599</b> | 111 | 0.920  | 7.06E-15 | 5.03E-11 | establishment of protein localization to endoplasmic reticulum      |
| <b>GO:0042773</b> | 81  | 0.957  | 5.76E-15 | 5.03E-11 | ATP synthesis coupled electron transport                            |
| <b>GO:0042775</b> | 80  | 0.959  | 9.35E-15 | 5.40E-11 | mitochondrial ATP synthesis coupled electron transport              |
| <b>GO:0043299</b> | 493 | 0.359  | 1.15E-14 | 6.04E-11 | leukocyte degranulation                                             |
| <b>GO:0000184</b> | 117 | 0.856  | 1.79E-14 | 8.62E-11 | nuclear-transcribed mRNA catabolic process, nonsense-mediated decay |
| <b>GO:0070972</b> | 135 | 0.777  | 3.14E-14 | 1.39E-10 | protein localization to endoplasmic reticulum                       |
| <b>GO:0022904</b> | 100 | 0.812  | 5.16E-14 | 2.13E-10 | respiratory electron transport chain                                |
| <b>GO:0035459</b> | 19  | -1.276 | 8.96E-14 | 3.45E-10 | vesicle cargo loading                                               |
| <b>GO:0034341</b> | 163 | 0.599  | 1.42E-13 | 5.11E-10 | response to interferon-gamma                                        |
| <b>GO:0050900</b> | 400 | 0.380  | 1.63E-13 | 5.54E-10 | leukocyte migration                                                 |
| <b>GO:0006397</b> | 474 | -0.341 | 3.03E-13 | 9.73E-10 | mRNA processing                                                     |
| <b>GO:0010257</b> | 58  | 0.961  | 8.84E-13 | 2.56E-09 | NADH dehydrogenase complex assembly                                 |
| <b>GO:0032981</b> | 58  | 0.961  | 8.84E-13 | 2.56E-09 | mitochondrial respiratory chain complex I assembly                  |
| <b>GO:0034976</b> | 274 | -0.439 | 1.58E-12 | 4.17E-09 | response to endoplasmic reticulum stress                            |
| <b>GO:0036230</b> | 464 | 0.337  | 1.59E-12 | 4.17E-09 | granulocyte activation                                              |
| <b>GO:0042119</b> | 458 | 0.336  | 2.70E-12 | 6.77E-09 | neutrophil activation                                               |
| <b>GO:0007030</b> | 122 | -0.654 | 2.94E-12 | 6.80E-09 | Golgi organization                                                  |
| <b>GO:0006120</b> | 46  | 1.141  | 2.88E-12 | 6.80E-09 | mitochondrial electron transport, NADH to ubiquinone                |
| <b>GO:0002446</b> | 460 | 0.329  | 6.43E-12 | 1.43E-08 | neutrophil mediated immunity                                        |
| <b>GO:0043062</b> | 355 | 0.367  | 1.12E-11 | 2.40E-08 | extracellular structure organization                                |
| <b>GO:0002283</b> | 449 | 0.328  | 1.29E-11 | 2.56E-08 | neutrophil activation involved in immune response                   |
| <b>GO:0043312</b> | 447 | 0.329  | 1.26E-11 | 2.56E-08 | neutrophil degranulation                                            |
| <b>GO:0030198</b> | 354 | 0.364  | 1.69E-11 | 3.26E-08 | extracellular matrix organization                                   |
| <b>GO:0033108</b> | 87  | 0.750  | 2.20E-11 | 4.11E-08 | mitochondrial respiratory chain complex assembly                    |
| <b>GO:0016570</b> | 434 | -0.327 | 2.70E-11 | 4.88E-08 | histone modification                                                |
| <b>GO:0016569</b> | 448 | -0.319 | 3.78E-11 | 6.63E-08 | covalent chromatin modification                                     |
| <b>GO:0050684</b> | 128 | -0.576 | 6.38E-11 | 1.08E-07 | regulation of mRNA processing                                       |
| <b>GO:0006909</b> | 256 | 0.416  | 1.05E-10 | 1.74E-07 | phagocytosis                                                        |
| <b>GO:0019083</b> | 173 | 0.525  | 1.20E-10 | 1.93E-07 | viral transcription                                                 |
| <b>GO:0090110</b> | 14  | -1.283 | 2.24E-10 | 3.50E-07 | COPII-coated vesicle cargo loading                                  |

|                   |     |        |          |          |                                                                   |
|-------------------|-----|--------|----------|----------|-------------------------------------------------------------------|
| <b>GO:1903311</b> | 308 | -0.367 | 2.56E-10 | 3.90E-07 | regulation of mRNA metabolic process                              |
| <b>GO:0090150</b> | 317 | 0.358  | 5.33E-10 | 7.90E-07 | establishment of protein localization to membrane                 |
| <b>GO:0030433</b> | 75  | -0.754 | 6.32E-10 | 9.13E-07 | ubiquitin-dependent ERAD pathway                                  |
| <b>GO:0048193</b> | 352 | -0.339 | 6.58E-10 | 9.28E-07 | Golgi vesicle transport                                           |
| <b>GO:0002237</b> | 318 | 0.351  | 8.76E-10 | 1.21E-06 | response to molecule of bacterial origin                          |
| <b>GO:0002685</b> | 185 | 0.463  | 1.04E-09 | 1.40E-06 | regulation of leukocyte migration                                 |
| <b>GO:0002694</b> | 476 | 0.283  | 1.59E-09 | 2.08E-06 | regulation of leukocyte activation                                |
| <b>GO:0050867</b> | 306 | 0.349  | 2.32E-09 | 2.98E-06 | positive regulation of cell activation                            |
| <b>GO:0019080</b> | 187 | 0.458  | 2.60E-09 | 3.27E-06 | viral gene expression                                             |
| <b>GO:0035966</b> | 190 | -0.438 | 3.17E-09 | 3.90E-06 | response to topologically incorrect protein                       |
| <b>GO:0070661</b> | 271 | 0.367  | 3.31E-09 | 3.99E-06 | leukocyte proliferation                                           |
| <b>GO:0006413</b> | 186 | 0.449  | 5.54E-09 | 6.54E-06 | translational initiation                                          |
| <b>GO:0060333</b> | 65  | 0.753  | 5.65E-09 | 6.54E-06 | interferon-gamma-mediated signaling pathway                       |
| <b>GO:0032963</b> | 98  | 0.594  | 7.76E-09 | 8.80E-06 | collagen metabolic process                                        |
| <b>GO:0070126</b> | 89  | 0.621  | 9.65E-09 | 1.07E-05 | mitochondrial translational termination                           |
| <b>GO:0008380</b> | 407 | -0.288 | 1.07E-08 | 1.17E-05 | RNA splicing                                                      |
| <b>GO:0043414</b> | 295 | -0.336 | 1.15E-08 | 1.23E-05 | macromolecule methylation                                         |
| <b>GO:0070125</b> | 88  | 0.626  | 1.25E-08 | 1.31E-05 | mitochondrial translational elongation                            |
| <b>GO:0010256</b> | 413 | -0.285 | 1.35E-08 | 1.39E-05 | endomembrane system organization                                  |
| <b>GO:0051650</b> | 182 | -0.431 | 1.58E-08 | 1.57E-05 | establishment of vesicle localization                             |
| <b>GO:0032496</b> | 307 | 0.329  | 1.55E-08 | 1.57E-05 | response to lipopolysaccharide                                    |
| <b>GO:0002696</b> | 297 | 0.334  | 1.65E-08 | 1.62E-05 | positive regulation of leukocyte activation                       |
| <b>GO:0010498</b> | 459 | -0.269 | 1.71E-08 | 1.65E-05 | proteasomal protein catabolic process                             |
| <b>GO:0036503</b> | 97  | -0.599 | 1.82E-08 | 1.73E-05 | ERAD pathway                                                      |
| <b>GO:0006888</b> | 203 | -0.408 | 1.89E-08 | 1.76E-05 | endoplasmic reticulum to Golgi vesicle-mediated transport         |
| <b>GO:0032943</b> | 250 | 0.363  | 2.03E-08 | 1.86E-05 | mononuclear cell proliferation                                    |
| <b>GO:0043161</b> | 406 | -0.284 | 2.10E-08 | 1.90E-05 | proteasome-mediated ubiquitin-dependent protein catabolic process |
| <b>GO:0006986</b> | 169 | -0.435 | 2.81E-08 | 2.49E-05 | response to unfolded protein                                      |
| <b>GO:0046651</b> | 248 | 0.360  | 2.84E-08 | 2.49E-05 | lymphocyte proliferation                                          |
| <b>GO:0002687</b> | 124 | 0.499  | 5.55E-08 | 4.79E-05 | positive regulation of leukocyte migration                        |
| <b>GO:0035967</b> | 153 | -0.445 | 6.72E-08 | 5.71E-05 | cellular response to topologically incorrect protein              |

|                   |     |        |          |          |                                                                |
|-------------------|-----|--------|----------|----------|----------------------------------------------------------------|
| <b>GO:0015985</b> | 20  | 1.201  | 8.03E-08 | 6.63E-05 | energy coupled proton transport, down electrochemical gradient |
| <b>GO:0015986</b> | 20  | 1.201  | 8.03E-08 | 6.63E-05 | ATP synthesis coupled proton transport                         |
| <b>GO:0002683</b> | 376 | 0.281  | 8.77E-08 | 7.14E-05 | negative regulation of immune system process                   |
| <b>GO:0060326</b> | 268 | 0.330  | 1.15E-07 | 9.21E-05 | cell chemotaxis                                                |
| <b>GO:1901685</b> | 19  | 1.047  | 1.30E-07 | 1.01E-04 | glutathione derivative metabolic process                       |
| <b>GO:1901687</b> | 19  | 1.047  | 1.30E-07 | 1.01E-04 | glutathione derivative biosynthetic process                    |
| <b>GO:0016458</b> | 202 | -0.377 | 1.36E-07 | 1.05E-04 | gene silencing                                                 |
| <b>GO:0051648</b> | 201 | -0.379 | 1.39E-07 | 1.06E-04 | vesicle localization                                           |
| <b>GO:0048194</b> | 79  | -0.657 | 1.59E-07 | 1.18E-04 | Golgi vesicle budding                                          |
| <b>GO:0016441</b> | 129 | -0.470 | 1.58E-07 | 1.18E-04 | posttranscriptional gene silencing                             |
| <b>GO:0006900</b> | 100 | -0.561 | 1.63E-07 | 1.19E-04 | vesicle budding from membrane                                  |
| <b>GO:0045333</b> | 177 | 0.404  | 1.68E-07 | 1.22E-04 | cellular respiration                                           |
| <b>GO:0032259</b> | 347 | -0.281 | 2.25E-07 | 1.61E-04 | methylation                                                    |
| <b>GO:0050866</b> | 181 | 0.392  | 2.29E-07 | 1.62E-04 | negative regulation of cell activation                         |
| <b>GO:0042776</b> | 19  | 1.200  | 2.46E-07 | 1.71E-04 | mitochondrial ATP synthesis coupled proton transport           |
| <b>GO:0031047</b> | 150 | -0.426 | 2.55E-07 | 1.76E-04 | gene silencing by RNA                                          |
| <b>GO:0070663</b> | 207 | 0.366  | 2.62E-07 | 1.78E-04 | regulation of leukocyte proliferation                          |
| <b>GO:0002250</b> | 352 | 0.279  | 2.77E-07 | 1.86E-04 | adaptive immune response                                       |
| <b>GO:0060628</b> | 16  | -1.139 | 3.08E-07 | 2.04E-04 | regulation of ER to Golgi vesicle-mediated transport           |
| <b>GO:0032944</b> | 197 | 0.373  | 3.21E-07 | 2.11E-04 | regulation of mononuclear cell proliferation                   |
| <b>GO:0035194</b> | 128 | -0.457 | 3.71E-07 | 2.41E-04 | post-transcriptional gene silencing by RNA                     |
| <b>GO:0048024</b> | 90  | -0.530 | 3.86E-07 | 2.45E-04 | regulation of mRNA splicing, via spliceosome                   |
| <b>GO:0050920</b> | 202 | 0.363  | 3.82E-07 | 2.45E-04 | regulation of chemotaxis                                       |
| <b>GO:0043484</b> | 126 | -0.451 | 4.01E-07 | 2.52E-04 | regulation of RNA splicing                                     |
| <b>GO:0006903</b> | 91  | -0.570 | 4.17E-07 | 2.59E-04 | vesicle targeting                                              |
| <b>GO:0050670</b> | 196 | 0.370  | 4.26E-07 | 2.62E-04 | regulation of lymphocyte proliferation                         |
| <b>GO:0033044</b> | 326 | -0.284 | 4.50E-07 | 2.74E-04 | regulation of chromosome organization                          |
| <b>GO:0002695</b> | 160 | 0.407  | 4.70E-07 | 2.83E-04 | negative regulation of leukocyte activation                    |
| <b>GO:0042752</b> | 112 | -0.481 | 4.80E-07 | 2.86E-04 | regulation of circadian rhythm                                 |
| <b>GO:0071219</b> | 187 | 0.376  | 5.04E-07 | 2.97E-04 | cellular response to molecule of bacterial origin              |
| <b>GO:0006403</b> | 219 | -0.343 | 5.17E-07 | 3.02E-04 | RNA localization                                               |
| <b>GO:0042742</b> | 192 | 0.367  | 5.79E-07 | 3.35E-04 | defense response to bacterium                                  |

|                   |     |        |          |          |                                                             |
|-------------------|-----|--------|----------|----------|-------------------------------------------------------------|
| <b>GO:0071222</b> | 181 | 0.379  | 6.09E-07 | 3.48E-04 | cellular response to lipopolysaccharide                     |
| <b>GO:0006415</b> | 102 | 0.504  | 6.33E-07 | 3.59E-04 | translational termination                                   |
| <b>GO:0030518</b> | 125 | -0.454 | 6.42E-07 | 3.60E-04 | intracellular steroid hormone receptor signaling pathway    |
| <b>GO:0006607</b> | 16  | -1.034 | 6.83E-07 | 3.80E-04 | NLS-bearing protein import into nucleus                     |
| <b>GO:0006405</b> | 129 | -0.441 | 7.13E-07 | 3.92E-04 | RNA export from nucleus                                     |
| <b>GO:0031124</b> | 96  | -0.507 | 7.22E-07 | 3.94E-04 | mRNA 3'-end processing                                      |
| <b>GO:0032946</b> | 127 | 0.446  | 7.95E-07 | 4.29E-04 | positive regulation of mononuclear cell proliferation       |
| <b>GO:0050727</b> | 317 | 0.280  | 9.22E-07 | 4.93E-04 | regulation of inflammatory response                         |
| <b>GO:0051168</b> | 188 | -0.360 | 1.08E-06 | 5.70E-04 | nuclear export                                              |
| <b>GO:0071674</b> | 77  | 0.563  | 1.09E-06 | 5.70E-04 | mononuclear cell migration                                  |
| <b>GO:0050671</b> | 126 | 0.442  | 1.11E-06 | 5.76E-04 | positive regulation of lymphocyte proliferation             |
| <b>GO:0035456</b> | 25  | 0.985  | 1.22E-06 | 6.32E-04 | response to interferon-beta                                 |
| <b>GO:0032103</b> | 469 | 0.228  | 1.31E-06 | 6.66E-04 | positive regulation of response to external stimulus        |
| <b>GO:0050921</b> | 132 | 0.429  | 1.32E-06 | 6.66E-04 | positive regulation of chemotaxis                           |
| <b>GO:0000028</b> | 16  | 1.331  | 1.33E-06 | 6.66E-04 | ribosomal small subunit assembly                            |
| <b>GO:0070665</b> | 132 | 0.428  | 1.36E-06 | 6.78E-04 | positive regulation of leukocyte proliferation              |
| <b>GO:0002576</b> | 125 | 0.446  | 1.38E-06 | 6.83E-04 | platelet degranulation                                      |
| <b>GO:0002886</b> | 53  | 0.703  | 1.43E-06 | 6.98E-04 | regulation of myeloid leukocyte mediated immunity           |
| <b>GO:0016579</b> | 258 | -0.305 | 1.60E-06 | 7.78E-04 | protein deubiquitination                                    |
| <b>GO:0046034</b> | 270 | 0.298  | 1.68E-06 | 8.11E-04 | ATP metabolic process                                       |
| <b>GO:0045576</b> | 57  | 0.652  | 1.73E-06 | 8.28E-04 | mast cell activation                                        |
| <b>GO:0034620</b> | 134 | -0.420 | 1.79E-06 | 8.42E-04 | cellular response to unfolded protein                       |
| <b>GO:0030098</b> | 332 | 0.266  | 1.79E-06 | 8.42E-04 | lymphocyte differentiation                                  |
| <b>GO:0007623</b> | 208 | -0.334 | 2.02E-06 | 9.41E-04 | circadian rhythm                                            |
| <b>GO:0009048</b> | 17  | -1.075 | 2.09E-06 | 9.68E-04 | dosage compensation by inactivation of X chromosome         |
| <b>GO:0000375</b> | 324 | -0.265 | 2.29E-06 | 1.05E-03 | RNA splicing, via transesterification reactions             |
| <b>GO:1900034</b> | 76  | -0.546 | 2.33E-06 | 1.06E-03 | regulation of cellular response to heat                     |
| <b>GO:0002521</b> | 488 | 0.217  | 2.55E-06 | 1.15E-03 | leukocyte differentiation                                   |
| <b>GO:0050707</b> | 48  | 0.688  | 2.56E-06 | 1.15E-03 | regulation of cytokine secretion                            |
| <b>GO:0002448</b> | 47  | 0.716  | 2.62E-06 | 1.17E-03 | mast cell mediated immunity                                 |
| <b>GO:2000249</b> | 38  | 0.836  | 2.68E-06 | 1.18E-03 | regulation of actin cytoskeleton reorganization             |
| <b>GO:2001056</b> | 135 | 0.408  | 2.86E-06 | 1.25E-03 | positive regulation of cysteine-type endopeptidase activity |



|                   |     |        |          |          |                                                                                      |
|-------------------|-----|--------|----------|----------|--------------------------------------------------------------------------------------|
| <b>GO:0070646</b> | 274 | -0.288 | 2.98E-06 | 1.30E-03 | protein modification by small protein removal                                        |
| <b>GO:0002279</b> | 46  | 0.704  | 3.29E-06 | 1.42E-03 | mast cell activation involved in immune response                                     |
| <b>GO:0006479</b> | 175 | -0.354 | 3.45E-06 | 1.47E-03 | protein methylation                                                                  |
| <b>GO:0008213</b> | 175 | -0.354 | 3.45E-06 | 1.47E-03 | protein alkylation                                                                   |
| <b>GO:0000377</b> | 321 | -0.261 | 3.76E-06 | 1.57E-03 | RNA splicing, via transesterification reactions with bulged adenosine as nucleophile |
| <b>GO:0000398</b> | 321 | -0.261 | 3.76E-06 | 1.57E-03 | mRNA splicing, via spliceosome                                                       |
| <b>GO:0048199</b> | 73  | -0.589 | 3.84E-06 | 1.59E-03 | vesicle targeting, to, from or within Golgi                                          |
| <b>GO:0042110</b> | 431 | 0.226  | 3.84E-06 | 1.59E-03 | T cell activation                                                                    |
| <b>GO:1901568</b> | 140 | 0.394  | 4.00E-06 | 1.64E-03 | fatty acid derivative metabolic process                                              |
| <b>GO:0016571</b> | 137 | -0.398 | 4.08E-06 | 1.66E-03 | histone methylation                                                                  |
| <b>GO:0030968</b> | 117 | -0.435 | 4.16E-06 | 1.68E-03 | endoplasmic reticulum unfolded protein response                                      |
| <b>GO:0052547</b> | 383 | 0.238  | 4.63E-06 | 1.86E-03 | regulation of peptidase activity                                                     |
| <b>GO:0043303</b> | 45  | 0.702  | 4.68E-06 | 1.87E-03 | mast cell degranulation                                                              |
| <b>GO:0006605</b> | 417 | 0.228  | 4.73E-06 | 1.87E-03 | protein targeting                                                                    |
| <b>GO:0018205</b> | 378 | -0.239 | 4.80E-06 | 1.89E-03 | peptidyl-lysine modification                                                         |
| <b>GO:0051236</b> | 185 | -0.340 | 4.93E-06 | 1.93E-03 | establishment of RNA localization                                                    |
| <b>GO:0046185</b> | 13  | 1.069  | 5.24E-06 | 2.03E-03 | aldehyde catabolic process                                                           |
| <b>GO:0001819</b> | 356 | 0.245  | 5.32E-06 | 2.05E-03 | positive regulation of cytokine production                                           |
| <b>GO:0006901</b> | 69  | -0.605 | 5.45E-06 | 2.08E-03 | vesicle coating                                                                      |
| <b>GO:0035195</b> | 119 | -0.423 | 5.46E-06 | 2.08E-03 | gene silencing by miRNA                                                              |
| <b>GO:0051251</b> | 254 | 0.289  | 5.96E-06 | 2.25E-03 | positive regulation of lymphocyte activation                                         |
| <b>GO:1905517</b> | 46  | 0.701  | 6.01E-06 | 2.26E-03 | macrophage migration                                                                 |
| <b>GO:0036500</b> | 10  | -1.246 | 6.44E-06 | 2.39E-03 | ATF6-mediated unfolded protein response                                              |
| <b>GO:0010952</b> | 172 | 0.350  | 6.41E-06 | 2.39E-03 | positive regulation of peptidase activity                                            |
| <b>GO:0032527</b> | 44  | -0.732 | 6.65E-06 | 2.45E-03 | protein exit from endoplasmic reticulum                                              |
| <b>GO:0006378</b> | 43  | -0.696 | 6.74E-06 | 2.45E-03 | mRNA polyadenylation                                                                 |
| <b>GO:0043631</b> | 43  | -0.696 | 6.74E-06 | 2.45E-03 | RNA polyadenylation                                                                  |
| <b>GO:0030522</b> | 267 | -0.279 | 7.15E-06 | 2.58E-03 | intracellular receptor signaling pathway                                             |
| <b>GO:0042116</b> | 88  | 0.495  | 7.22E-06 | 2.59E-03 | macrophage activation                                                                |
| <b>GO:0042098</b> | 173 | 0.346  | 7.34E-06 | 2.62E-03 | T cell proliferation                                                                 |
| <b>GO:0033003</b> | 39  | 0.739  | 7.39E-06 | 2.62E-03 | regulation of mast cell activation                                                   |
| <b>GO:0033006</b> | 30  | 0.863  | 7.47E-06 | 2.63E-03 | regulation of mast cell activation involved in immune response                       |
| <b>GO:2000116</b> | 219 | 0.307  | 7.70E-06 | 2.70E-03 | regulation of cysteine-type endopeptidase activity                                   |

|                   |     |        |          |          |                                                                                           |
|-------------------|-----|--------|----------|----------|-------------------------------------------------------------------------------------------|
| <b>GO:0097529</b> | 184 | 0.334  | 7.83E-06 | 2.73E-03 | myeloid leukocyte migration                                                               |
| <b>GO:0010950</b> | 153 | 0.365  | 8.13E-06 | 2.81E-03 | positive regulation of endopeptidase activity                                             |
| <b>GO:0000956</b> | 194 | 0.330  | 8.33E-06 | 2.87E-03 | nuclear-transcribed mRNA catabolic process                                                |
| <b>GO:0042149</b> | 40  | -0.697 | 8.72E-06 | 2.95E-03 | cellular response to glucose starvation                                                   |
| <b>GO:0002697</b> | 351 | 0.241  | 8.69E-06 | 2.95E-03 | regulation of immune effector process                                                     |
| <b>GO:0002699</b> | 188 | 0.330  | 8.65E-06 | 2.95E-03 | positive regulation of immune effector process                                            |
| <b>GO:0030595</b> | 196 | 0.322  | 9.71E-06 | 3.26E-03 | leukocyte chemotaxis                                                                      |
| <b>GO:0032786</b> | 28  | -0.808 | 9.95E-06 | 3.32E-03 | positive regulation of DNA-templated transcription, elongation                            |
| <b>GO:0006611</b> | 173 | -0.340 | 1.02E-05 | 3.34E-03 | protein export from nucleus                                                               |
| <b>GO:0045785</b> | 386 | 0.228  | 1.02E-05 | 3.34E-03 | positive regulation of cell adhesion                                                      |
| <b>GO:0031532</b> | 99  | 0.456  | 1.02E-05 | 3.34E-03 | actin cytoskeleton reorganization                                                         |
| <b>GO:0006913</b> | 329 | -0.246 | 1.05E-05 | 3.44E-03 | nucleocytoplasmic transport                                                               |
| <b>GO:0050663</b> | 61  | 0.576  | 1.07E-05 | 3.48E-03 | cytokine secretion                                                                        |
| <b>GO:0006409</b> | 32  | -0.795 | 1.14E-05 | 3.63E-03 | tRNA export from nucleus                                                                  |
| <b>GO:0071431</b> | 32  | -0.795 | 1.14E-05 | 3.63E-03 | tRNA-containing ribonucleoprotein complex export from nucleus                             |
| <b>GO:0071426</b> | 121 | -0.402 | 1.13E-05 | 3.63E-03 | ribonucleoprotein complex export from nucleus                                             |
| <b>GO:0043304</b> | 29  | 0.866  | 1.15E-05 | 3.64E-03 | regulation of mast cell degranulation                                                     |
| <b>GO:0043280</b> | 118 | 0.408  | 1.20E-05 | 3.80E-03 | positive regulation of cysteine-type endopeptidase activity involved in apoptotic process |
| <b>GO:0031123</b> | 133 | -0.381 | 1.22E-05 | 3.82E-03 | RNA 3'-end processing                                                                     |
| <b>GO:0007229</b> | 106 | 0.436  | 1.29E-05 | 4.04E-03 | integrin-mediated signaling pathway                                                       |
| <b>GO:0000380</b> | 72  | -0.519 | 1.33E-05 | 4.11E-03 | alternative mRNA splicing, via spliceosome                                                |
| <b>GO:0007599</b> | 311 | 0.250  | 1.33E-05 | 4.11E-03 | hemostasis                                                                                |
| <b>GO:0051169</b> | 332 | -0.241 | 1.40E-05 | 4.29E-03 | nuclear transport                                                                         |
| <b>GO:0045766</b> | 161 | 0.345  | 1.45E-05 | 4.44E-03 | positive regulation of angiogenesis                                                       |
| <b>GO:0017148</b> | 123 | -0.401 | 1.52E-05 | 4.62E-03 | negative regulation of translation                                                        |
| <b>GO:0051249</b> | 395 | 0.221  | 1.53E-05 | 4.64E-03 | regulation of lymphocyte activation                                                       |
| <b>GO:0006110</b> | 72  | -0.524 | 1.54E-05 | 4.65E-03 | regulation of glycolytic process                                                          |
| <b>GO:0090114</b> | 71  | -0.548 | 1.61E-05 | 4.79E-03 | COPII-coated vesicle budding                                                              |
| <b>GO:0050657</b> | 182 | -0.323 | 1.62E-05 | 4.79E-03 | nucleic acid transport                                                                    |
| <b>GO:0050658</b> | 182 | -0.323 | 1.62E-05 | 4.79E-03 | RNA transport                                                                             |

|                   |     |        |          |          |                                                               |
|-------------------|-----|--------|----------|----------|---------------------------------------------------------------|
| <b>GO:0002688</b> | 106 | 0.426  | 1.75E-05 | 5.15E-03 | regulation of leukocyte chemotaxis                            |
| <b>GO:0150076</b> | 63  | 0.572  | 1.81E-05 | 5.31E-03 | neuroinflammatory response                                    |
| <b>GO:0031331</b> | 345 | -0.233 | 2.01E-05 | 5.84E-03 | positive regulation of cellular catabolic process             |
| <b>GO:0034248</b> | 381 | -0.222 | 2.00E-05 | 5.84E-03 | regulation of cellular amide metabolic process                |
| <b>GO:0006406</b> | 105 | -0.418 | 2.07E-05 | 5.87E-03 | mRNA export from nucleus                                      |
| <b>GO:0071427</b> | 105 | -0.418 | 2.07E-05 | 5.87E-03 | mRNA-containing ribonucleoprotein complex export from nucleus |
| <b>GO:0071166</b> | 122 | -0.388 | 2.07E-05 | 5.87E-03 | ribonucleoprotein complex localization                        |
| <b>GO:0034504</b> | 251 | -0.272 | 2.06E-05 | 5.87E-03 | protein localization to nucleus                               |
| <b>GO:0007596</b> | 306 | 0.247  | 2.06E-05 | 5.87E-03 | blood coagulation                                             |
| <b>GO:0006801</b> | 66  | 0.537  | 2.15E-05 | 6.05E-03 | superoxide metabolic process                                  |
| <b>GO:0030970</b> | 28  | -0.809 | 2.17E-05 | 6.06E-03 | retrograde protein transport, ER to cytosol                   |
| <b>GO:1903513</b> | 28  | -0.809 | 2.17E-05 | 6.06E-03 | endoplasmic reticulum to cytosol transport                    |
| <b>GO:1901342</b> | 310 | 0.243  | 2.23E-05 | 6.17E-03 | regulation of vasculature development                         |
| <b>GO:0050764</b> | 91  | 0.455  | 2.23E-05 | 6.17E-03 | regulation of phagocytosis                                    |
| <b>GO:0043401</b> | 176 | -0.324 | 2.27E-05 | 6.24E-03 | steroid hormone mediated signaling pathway                    |
| <b>GO:0072676</b> | 94  | 0.454  | 2.29E-05 | 6.27E-03 | lymphocyte migration                                          |
| <b>GO:0048511</b> | 297 | -0.249 | 2.33E-05 | 6.33E-03 | rhythmic process                                              |
| <b>GO:0032543</b> | 134 | 0.370  | 2.33E-05 | 6.33E-03 | mitochondrial translation                                     |
| <b>GO:0050728</b> | 128 | 0.381  | 2.35E-05 | 6.33E-03 | negative regulation of inflammatory response                  |
| <b>GO:0002431</b> | 84  | 0.481  | 2.36E-05 | 6.33E-03 | Fc receptor mediated stimulatory signaling pathway            |
| <b>GO:1905521</b> | 35  | 0.786  | 2.37E-05 | 6.35E-03 | regulation of macrophage migration                            |
| <b>GO:0007159</b> | 313 | 0.242  | 2.46E-05 | 6.53E-03 | leukocyte cell-cell adhesion                                  |
| <b>GO:0009595</b> | 28  | 0.803  | 2.46E-05 | 6.53E-03 | detection of biotic stimulus                                  |
| <b>GO:0071216</b> | 211 | 0.295  | 2.48E-05 | 6.55E-03 | cellular response to biotic stimulus                          |
| <b>GO:1904356</b> | 59  | -0.555 | 2.50E-05 | 6.57E-03 | regulation of telomere maintenance via telomere lengthening   |
| <b>GO:0150079</b> | 10  | 1.198  | 2.53E-05 | 6.62E-03 | negative regulation of neuroinflammatory response             |
| <b>GO:0097064</b> | 36  | -0.713 | 2.57E-05 | 6.65E-03 | ncRNA export from nucleus                                     |
| <b>GO:0052548</b> | 358 | 0.225  | 2.58E-05 | 6.65E-03 | regulation of endopeptidase activity                          |
| <b>GO:0050817</b> | 310 | 0.242  | 2.56E-05 | 6.65E-03 | coagulation                                                   |
| <b>GO:0000381</b> | 61  | -0.533 | 2.66E-05 | 6.80E-03 | regulation of alternative mRNA splicing, via spliceosome      |

|                   |     |        |          |          |                                                            |
|-------------------|-----|--------|----------|----------|------------------------------------------------------------|
| <b>GO:0042102</b> | 90  | 0.451  | 2.66E-05 | 6.80E-03 | positive regulation of T cell proliferation                |
| <b>GO:1903039</b> | 205 | 0.298  | 2.71E-05 | 6.90E-03 | positive regulation of leukocyte cell-cell adhesion        |
| <b>GO:0045765</b> | 280 | 0.253  | 2.73E-05 | 6.91E-03 | regulation of angiogenesis                                 |
| <b>GO:0015931</b> | 227 | -0.280 | 2.83E-05 | 7.14E-03 | nucleobase-containing compound transport                   |
| <b>GO:0043300</b> | 43  | 0.677  | 2.85E-05 | 7.15E-03 | regulation of leukocyte degranulation                      |
| <b>GO:0060968</b> | 108 | -0.408 | 2.89E-05 | 7.19E-03 | regulation of gene silencing                               |
| <b>GO:0001774</b> | 43  | 0.691  | 2.90E-05 | 7.19E-03 | microglial cell activation                                 |
| <b>GO:0002269</b> | 43  | 0.691  | 2.90E-05 | 7.19E-03 | leukocyte activation involved in inflammatory response     |
| <b>GO:0006487</b> | 77  | -0.482 | 2.97E-05 | 7.35E-03 | protein N-linked glycosylation                             |
| <b>GO:0002888</b> | 32  | 0.773  | 3.07E-05 | 7.55E-03 | positive regulation of myeloid leukocyte mediated immunity |
| <b>GO:0051028</b> | 141 | -0.353 | 3.27E-05 | 8.01E-03 | mRNA transport                                             |
| <b>GO:0034660</b> | 436 | -0.202 | 3.30E-05 | 8.04E-03 | ncRNA metabolic process                                    |
| <b>GO:0006417</b> | 331 | -0.231 | 3.47E-05 | 8.42E-03 | regulation of translation                                  |
| <b>GO:0016573</b> | 149 | -0.343 | 3.49E-05 | 8.44E-03 | histone acetylation                                        |
| <b>GO:0032210</b> | 52  | -0.579 | 3.64E-05 | 8.76E-03 | regulation of telomere maintenance via telomerase          |
| <b>GO:0002690</b> | 84  | 0.460  | 3.86E-05 | 9.26E-03 | positive regulation of leukocyte chemotaxis                |
| <b>GO:0034968</b> | 113 | -0.392 | 3.88E-05 | 9.27E-03 | histone lysine methylation                                 |
| <b>GO:0018210</b> | 122 | -0.379 | 4.12E-05 | 9.77E-03 | peptidyl-threonine modification                            |
| <b>GO:0034249</b> | 140 | -0.354 | 4.12E-05 | 9.77E-03 | negative regulation of cellular amide metabolic process    |
| <b>GO:0006984</b> | 46  | -0.617 | 4.16E-05 | 9.77E-03 | ER-nucleus signaling pathway                               |
| <b>GO:0038094</b> | 82  | 0.472  | 4.15E-05 | 9.77E-03 | Fc-gamma receptor signaling pathway                        |
| <b>GO:0000186</b> | 55  | -0.572 | 4.22E-05 | 9.83E-03 | activation of MAPKK activity                               |
| <b>GO:0022409</b> | 241 | 0.267  | 4.22E-05 | 9.83E-03 | positive regulation of cell-cell adhesion                  |
| <b>GO:0060147</b> | 90  | -0.438 | 4.32E-05 | 9.98E-03 | regulation of posttranscriptional gene silencing           |
| <b>GO:0060966</b> | 90  | -0.438 | 4.32E-05 | 9.98E-03 | regulation of gene silencing by RNA                        |
| <b>GO:0060337</b> | 67  | 0.520  | 4.37E-05 | 1.00E-02 | type I interferon signaling pathway                        |
| <b>GO:0071357</b> | 67  | 0.520  | 4.37E-05 | 1.00E-02 | cellular response to type I interferon                     |
| <b>GO:0051031</b> | 34  | -0.732 | 4.40E-05 | 1.01E-02 | tRNA transport                                             |
| <b>GO:0000209</b> | 299 | -0.239 | 4.43E-05 | 1.01E-02 | protein polyubiquitination                                 |
| <b>GO:0032102</b> | 333 | 0.227  | 4.44E-05 | 1.01E-02 | negative regulation of response to external stimulus       |
| <b>GO:0007007</b> | 41  | 0.659  | 4.54E-05 | 1.03E-02 | inner mitochondrial membrane organization                  |

|                   |     |        |          |          |                                                                                             |
|-------------------|-----|--------|----------|----------|---------------------------------------------------------------------------------------------|
| <b>GO:0071108</b> | 33  | -0.826 | 4.74E-05 | 1.06E-02 | protein K48-linked deubiquitination                                                         |
| <b>GO:0043470</b> | 81  | -0.461 | 4.74E-05 | 1.06E-02 | regulation of carbohydrate catabolic process                                                |
| <b>GO:0032680</b> | 103 | 0.408  | 4.96E-05 | 1.11E-02 | regulation of tumor necrosis factor production                                              |
| <b>GO:0045943</b> | 22  | -0.907 | 5.12E-05 | 1.14E-02 | positive regulation of transcription by RNA polymerase I                                    |
| <b>GO:0002703</b> | 180 | 0.306  | 5.18E-05 | 1.14E-02 | regulation of leukocyte mediated immunity                                                   |
| <b>GO:0006690</b> | 87  | 0.439  | 5.17E-05 | 1.14E-02 | icosanoid metabolic process                                                                 |
| <b>GO:0030574</b> | 42  | 0.619  | 5.22E-05 | 1.15E-02 | collagen catabolic process                                                                  |
| <b>GO:0010935</b> | 12  | 1.264  | 5.36E-05 | 1.17E-02 | regulation of macrophage cytokine production                                                |
| <b>GO:0007004</b> | 66  | -0.497 | 5.44E-05 | 1.18E-02 | telomere maintenance via telomerase                                                         |
| <b>GO:0030335</b> | 479 | 0.187  | 5.43E-05 | 1.18E-02 | positive regulation of cell migration                                                       |
| <b>GO:0071887</b> | 99  | 0.409  | 5.45E-05 | 1.18E-02 | leukocyte apoptotic process                                                                 |
| <b>GO:0043543</b> | 233 | -0.267 | 5.58E-05 | 1.20E-02 | protein acylation                                                                           |
| <b>GO:0050830</b> | 67  | 0.504  | 5.82E-05 | 1.25E-02 | defense response to Gram-positive bacterium                                                 |
| <b>GO:1904358</b> | 37  | -0.654 | 5.93E-05 | 1.27E-02 | positive regulation of telomere maintenance via telomere lengthening                        |
| <b>GO:0031663</b> | 54  | 0.570  | 5.93E-05 | 1.27E-02 | lipopolysaccharide-mediated signaling pathway                                               |
| <b>GO:0032204</b> | 77  | -0.464 | 6.08E-05 | 1.29E-02 | regulation of telomere maintenance                                                          |
| <b>GO:0002433</b> | 78  | 0.472  | 6.28E-05 | 1.32E-02 | immune response-regulating cell surface receptor signaling pathway involved in phagocytosis |
| <b>GO:0038096</b> | 78  | 0.472  | 6.28E-05 | 1.32E-02 | Fc-gamma receptor signaling pathway involved in phagocytosis                                |
| <b>GO:0018393</b> | 153 | -0.327 | 6.33E-05 | 1.33E-02 | internal peptidyl-lysine acetylation                                                        |
| <b>GO:0032640</b> | 107 | 0.394  | 6.32E-05 | 1.33E-02 | tumor necrosis factor production                                                            |
| <b>GO:0010833</b> | 77  | -0.457 | 6.36E-05 | 1.33E-02 | telomere maintenance via telomere lengthening                                               |
| <b>GO:0001776</b> | 84  | 0.444  | 6.40E-05 | 1.33E-02 | leukocyte homeostasis                                                                       |
| <b>GO:0043624</b> | 211 | 0.278  | 6.64E-05 | 1.37E-02 | cellular protein complex disassembly                                                        |
| <b>GO:0002335</b> | 24  | 0.802  | 6.65E-05 | 1.37E-02 | mature B cell differentiation                                                               |
| <b>GO:0006109</b> | 190 | -0.293 | 6.76E-05 | 1.39E-02 | regulation of carbohydrate metabolic process                                                |
| <b>GO:0048207</b> | 65  | -0.526 | 7.50E-05 | 1.53E-02 | vesicle targeting, rough ER to cis-Golgi                                                    |
| <b>GO:0048208</b> | 65  | -0.526 | 7.50E-05 | 1.53E-02 | COPII vesicle coating                                                                       |
| <b>GO:0022617</b> | 74  | 0.469  | 7.78E-05 | 1.58E-02 | extracellular matrix disassembly                                                            |

|                   |     |        |          |          |                                                                                  |
|-------------------|-----|--------|----------|----------|----------------------------------------------------------------------------------|
| <b>GO:0006959</b> | 190 | 0.289  | 8.13E-05 | 1.65E-02 | humoral immune response                                                          |
| <b>GO:0150077</b> | 34  | 0.735  | 8.25E-05 | 1.67E-02 | regulation of neuroinflammatory response                                         |
| <b>GO:0046456</b> | 43  | 0.599  | 8.40E-05 | 1.69E-02 | icosanoid biosynthetic process                                                   |
| <b>GO:1903555</b> | 106 | 0.388  | 8.68E-05 | 1.74E-02 | regulation of tumor necrosis factor superfamily cytokine production              |
| <b>GO:1903312</b> | 73  | -0.464 | 8.73E-05 | 1.75E-02 | negative regulation of mRNA metabolic process                                    |
| <b>GO:2000147</b> | 500 | 0.178  | 8.90E-05 | 1.77E-02 | positive regulation of cell motility                                             |
| <b>GO:0050829</b> | 58  | 0.519  | 8.97E-05 | 1.78E-02 | defense response to Gram-negative bacterium                                      |
| <b>GO:0050777</b> | 129 | 0.349  | 9.30E-05 | 1.84E-02 | negative regulation of immune response                                           |
| <b>GO:0043534</b> | 112 | 0.372  | 9.40E-05 | 1.85E-02 | blood vessel endothelial cell migration                                          |
| <b>GO:0018022</b> | 126 | -0.350 | 9.91E-05 | 1.95E-02 | peptidyl-lysine methylation                                                      |
| <b>GO:1904018</b> | 180 | 0.292  | 1.01E-04 | 1.97E-02 | positive regulation of vasculature development                                   |
| <b>GO:0043542</b> | 197 | 0.279  | 1.03E-04 | 2.01E-02 | endothelial cell migration                                                       |
| <b>GO:0042129</b> | 145 | 0.327  | 1.05E-04 | 2.04E-02 | regulation of T cell proliferation                                               |
| <b>GO:0071706</b> | 110 | 0.375  | 1.08E-04 | 2.10E-02 | tumor necrosis factor superfamily cytokine production                            |
| <b>GO:0019371</b> | 11  | 1.118  | 1.09E-04 | 2.11E-02 | cyclooxygenase pathway                                                           |
| <b>GO:0043281</b> | 196 | 0.280  | 1.10E-04 | 2.12E-02 | regulation of cysteine-type endopeptidase activity involved in apoptotic process |
| <b>GO:0009755</b> | 221 | -0.262 | 1.14E-04 | 2.18E-02 | hormone-mediated signaling pathway                                               |
| <b>GO:0018209</b> | 294 | -0.227 | 1.18E-04 | 2.25E-02 | peptidyl-serine modification                                                     |
| <b>GO:0036507</b> | 20  | -1.023 | 1.21E-04 | 2.29E-02 | protein demannosylation                                                          |
| <b>GO:0036508</b> | 20  | -1.023 | 1.21E-04 | 2.29E-02 | protein alpha-1,2-demannosylation                                                |
| <b>GO:0043984</b> | 20  | -0.775 | 1.24E-04 | 2.34E-02 | histone H4-K16 acetylation                                                       |
| <b>GO:2001252</b> | 167 | -0.300 | 1.24E-04 | 2.34E-02 | positive regulation of chromosome organization                                   |
| <b>GO:0045471</b> | 130 | 0.340  | 1.23E-04 | 2.34E-02 | response to ethanol                                                              |
| <b>GO:0006278</b> | 68  | -0.466 | 1.25E-04 | 2.34E-02 | RNA-dependent DNA biosynthetic process                                           |
| <b>GO:0099024</b> | 58  | 0.512  | 1.25E-04 | 2.35E-02 | plasma membrane invagination                                                     |
| <b>GO:0009206</b> | 55  | 0.533  | 1.28E-04 | 2.38E-02 | purine ribonucleoside triphosphate biosynthetic process                          |
| <b>GO:0009145</b> | 56  | 0.527  | 1.29E-04 | 2.39E-02 | purine nucleoside triphosphate biosynthetic process                              |
| <b>GO:0043031</b> | 15  | 0.982  | 1.31E-04 | 2.42E-02 | negative regulation of macrophage activation                                     |
| <b>GO:0033962</b> | 20  | -0.845 | 1.32E-04 | 2.44E-02 | P-body assembly                                                                  |

|                   |     |        |          |          |                                                                   |
|-------------------|-----|--------|----------|----------|-------------------------------------------------------------------|
| <b>GO:0050729</b> | 135 | 0.333  | 1.33E-04 | 2.44E-02 | positive regulation of inflammatory response                      |
| <b>GO:0033169</b> | 13  | -0.993 | 1.35E-04 | 2.47E-02 | histone H3-K9 demethylation                                       |
| <b>GO:0001525</b> | 481 | 0.177  | 1.35E-04 | 2.47E-02 | angiogenesis                                                      |
| <b>GO:0032212</b> | 34  | -0.648 | 1.37E-04 | 2.49E-02 | positive regulation of telomere maintenance via telomerase        |
| <b>GO:0018105</b> | 274 | -0.233 | 1.37E-04 | 2.49E-02 | peptidyl-serine phosphorylation                                   |
| <b>GO:0034453</b> | 26  | -0.752 | 1.39E-04 | 2.52E-02 | microtubule anchoring                                             |
| <b>GO:0018107</b> | 114 | -0.364 | 1.40E-04 | 2.52E-02 | peptidyl-threonine phosphorylation                                |
| <b>GO:0050870</b> | 191 | 0.278  | 1.48E-04 | 2.66E-02 | positive regulation of T cell activation                          |
| <b>GO:0005978</b> | 49  | -0.549 | 1.51E-04 | 2.69E-02 | glycogen biosynthetic process                                     |
| <b>GO:0009250</b> | 49  | -0.549 | 1.51E-04 | 2.69E-02 | glucan biosynthetic process                                       |
| <b>GO:0042407</b> | 29  | 0.741  | 1.55E-04 | 2.76E-02 | cristae formation                                                 |
| <b>GO:0060964</b> | 87  | -0.411 | 1.55E-04 | 2.76E-02 | regulation of gene silencing by miRNA                             |
| <b>GO:0001516</b> | 24  | 0.794  | 1.61E-04 | 2.84E-02 | prostaglandin biosynthetic process                                |
| <b>GO:0046457</b> | 24  | 0.794  | 1.61E-04 | 2.84E-02 | prostanoid biosynthetic process                                   |
| <b>GO:0006414</b> | 138 | 0.326  | 1.62E-04 | 2.86E-02 | translational elongation                                          |
| <b>GO:0018279</b> | 33  | -0.688 | 1.65E-04 | 2.89E-02 | protein N-linked glycosylation via asparagine                     |
| <b>GO:0007029</b> | 62  | -0.504 | 1.65E-04 | 2.89E-02 | endoplasmic reticulum organization                                |
| <b>GO:0045730</b> | 34  | 0.736  | 1.66E-04 | 2.89E-02 | respiratory burst                                                 |
| <b>GO:0002679</b> | 13  | 1.168  | 1.69E-04 | 2.94E-02 | respiratory burst involved in defense response                    |
| <b>GO:0042246</b> | 70  | 0.448  | 1.70E-04 | 2.95E-02 | tissue regeneration                                               |
| <b>GO:0051250</b> | 132 | 0.332  | 1.74E-04 | 3.02E-02 | negative regulation of lymphocyte activation                      |
| <b>GO:0016050</b> | 320 | -0.212 | 1.81E-04 | 3.13E-02 | vesicle organization                                              |
| <b>GO:0097237</b> | 110 | 0.357  | 1.87E-04 | 3.21E-02 | cellular response to toxic substance                              |
| <b>GO:0043302</b> | 23  | 0.801  | 1.93E-04 | 3.31E-02 | positive regulation of leukocyte degranulation                    |
| <b>GO:0043537</b> | 32  | 0.649  | 1.95E-04 | 3.34E-02 | negative regulation of blood vessel endothelial cell migration    |
| <b>GO:0002700</b> | 119 | 0.348  | 1.98E-04 | 3.38E-02 | regulation of production of molecular mediator of immune response |
| <b>GO:2000251</b> | 19  | 0.827  | 2.05E-04 | 3.49E-02 | positive regulation of actin cytoskeleton reorganization          |
| <b>GO:0007020</b> | 25  | -0.726 | 2.19E-04 | 3.69E-02 | microtubule nucleation                                            |
| <b>GO:0018196</b> | 34  | -0.660 | 2.18E-04 | 3.69E-02 | peptidyl-asparagine modification                                  |
| <b>GO:1901570</b> | 88  | 0.397  | 2.19E-04 | 3.69E-02 | fatty acid derivative biosynthetic process                        |
| <b>GO:0043535</b> | 88  | 0.398  | 2.19E-04 | 3.69E-02 | regulation of blood vessel endothelial cell migration             |

|                   |     |        |          |          |                                                                         |
|-------------------|-----|--------|----------|----------|-------------------------------------------------------------------------|
| <b>GO:0031348</b> | 185 | 0.275  | 2.25E-04 | 3.77E-02 | negative regulation of defense response                                 |
| <b>GO:0006911</b> | 49  | 0.539  | 2.26E-04 | 3.78E-02 | phagocytosis, engulfment                                                |
| <b>GO:0018394</b> | 161 | -0.294 | 2.27E-04 | 3.79E-02 | peptidyl-lysine acetylation                                             |
| <b>GO:0032956</b> | 317 | 0.210  | 2.29E-04 | 3.81E-02 | regulation of actin cytoskeleton organization                           |
| <b>GO:0009620</b> | 37  | 0.657  | 2.36E-04 | 3.90E-02 | response to fungus                                                      |
| <b>GO:0048246</b> | 34  | 0.661  | 2.37E-04 | 3.92E-02 | macrophage chemotaxis                                                   |
| <b>GO:0050832</b> | 24  | 0.776  | 2.39E-04 | 3.93E-02 | defense response to fungus                                              |
| <b>GO:0030521</b> | 57  | -0.497 | 2.44E-04 | 4.00E-02 | androgen receptor signaling pathway                                     |
| <b>GO:0006892</b> | 101 | -0.376 | 2.48E-04 | 4.05E-02 | post-Golgi vesicle-mediated transport                                   |
| <b>GO:0006475</b> | 158 | -0.294 | 2.50E-04 | 4.07E-02 | internal protein amino acid acetylation                                 |
| <b>GO:0030258</b> | 228 | -0.244 | 2.50E-04 | 4.07E-02 | lipid modification                                                      |
| <b>GO:0034340</b> | 70  | 0.454  | 2.54E-04 | 4.13E-02 | response to type I interferon                                           |
| <b>GO:0001510</b> | 76  | -0.418 | 2.57E-04 | 4.17E-02 | RNA methylation                                                         |
| <b>GO:1990748</b> | 102 | 0.362  | 2.61E-04 | 4.21E-02 | cellular detoxification                                                 |
| <b>GO:0035329</b> | 37  | -0.589 | 2.67E-04 | 4.28E-02 | hippo signaling                                                         |
| <b>GO:0033143</b> | 74  | -0.434 | 2.66E-04 | 4.28E-02 | regulation of intracellular steroid hormone receptor signaling pathway  |
| <b>GO:0042060</b> | 462 | 0.172  | 2.68E-04 | 4.29E-02 | wound healing                                                           |
| <b>GO:0031440</b> | 28  | -0.706 | 2.74E-04 | 4.36E-02 | regulation of mRNA 3'-end processing                                    |
| <b>GO:0001906</b> | 128 | 0.325  | 2.73E-04 | 4.36E-02 | cell killing                                                            |
| <b>GO:0033008</b> | 15  | 0.890  | 2.79E-04 | 4.42E-02 | positive regulation of mast cell activation involved in immune response |
| <b>GO:0043306</b> | 15  | 0.890  | 2.79E-04 | 4.42E-02 | positive regulation of mast cell degranulation                          |
| <b>GO:0045619</b> | 160 | 0.290  | 2.84E-04 | 4.49E-02 | regulation of lymphocyte differentiation                                |
| <b>GO:0043123</b> | 176 | 0.276  | 2.86E-04 | 4.51E-02 | positive regulation of I-kappaB kinase/NF-kappaB signaling              |
| <b>GO:0071675</b> | 43  | 0.565  | 2.88E-04 | 4.52E-02 | regulation of mononuclear cell migration                                |
| <b>GO:0016574</b> | 45  | -0.551 | 2.90E-04 | 4.54E-02 | histone ubiquitination                                                  |
| <b>GO:0046831</b> | 13  | -1.010 | 2.95E-04 | 4.61E-02 | regulation of RNA export from nucleus                                   |
| <b>GO:0032784</b> | 45  | -0.547 | 2.99E-04 | 4.66E-02 | regulation of DNA-templated transcription, elongation                   |
| <b>GO:0016577</b> | 25  | -0.715 | 3.02E-04 | 4.69E-02 | histone demethylation                                                   |
| <b>GO:0000723</b> | 141 | -0.306 | 3.07E-04 | 4.75E-02 | telomere maintenance                                                    |
| <b>GO:0009451</b> | 149 | -0.297 | 3.08E-04 | 4.76E-02 | RNA modification                                                        |
| <b>GO:0043255</b> | 87  | -0.391 | 3.23E-04 | 4.97E-02 | regulation of carbohydrate biosynthetic process                         |



| Molecular functions in Genetic group 2 in the most efficient group. |                 |        |          |          |                                                                                     |
|---------------------------------------------------------------------|-----------------|--------|----------|----------|-------------------------------------------------------------------------------------|
| Go term                                                             | Number of genes | LOR*   | pvalue   | padj     | Molecular functions                                                                 |
| GO:0003735                                                          | 155             | 1.165  | 4.37E-25 | 3.76E-20 | structural constituent of ribosome                                                  |
| GO:0003954                                                          | 38              | 1.355  | 9.97E-09 | 2.15E-05 | NADH dehydrogenase activity                                                         |
| GO:0008137                                                          | 38              | 1.355  | 9.97E-09 | 2.15E-05 | NADH dehydrogenase (ubiquinone) activity                                            |
| GO:0050136                                                          | 38              | 1.355  | 9.97E-09 | 2.15E-05 | NADH dehydrogenase (quinone) activity                                               |
| GO:0016655                                                          | 50              | 1.171  | 2.22E-02 | 3.83E-13 | oxidoreductase activity, acting on NAD(P)H, quinone or similar compound as acceptor |
| GO:0101005                                                          | 83              | -0.783 | 2.71E-13 | 3.89E-10 | ubiquitinyl hydrolase activity                                                      |
| GO:0004843                                                          | 80              | -0.775 | 1.29E-12 | 1.59E-09 | thiol-dependent ubiquitin-specific protease activity                                |
| GO:0008242                                                          | 90              | -0.711 | 3.03E+03 | 3.26E-09 | omega peptidase activity                                                            |
| GO:0005201                                                          | 157             | 0.480  | 1.71E-11 | 1.64E-07 | extracellular matrix structural constituent                                         |
| GO:0004842                                                          | 367             | -0.317 | 2.48E-10 | 2.14E-07 | ubiquitin-protein transferase activity                                              |
| GO:0016651                                                          | 95              | 0.618  | 3.45E-10 | 2.48E-07 | oxidoreductase activity, acting on NAD(P)H                                          |
| GO:0019787                                                          | 390             | -0.306 | 3.25E-10 | 2.48E-07 | ubiquitin-like protein transferase activity                                         |
| GO:0003729                                                          | 235             | -0.386 | 6.56E-10 | 4.35E-07 | mRNA binding                                                                        |
| GO:0030545                                                          | 444             | 0.273  | 1.31E-09 | 8.05E-07 | receptor regulator activity                                                         |
| GO:0030546                                                          | 418             | 0.280  | 1.48E-09 | 8.50E-07 | signaling receptor activator activity                                               |
| GO:0048018                                                          | 412             | 0.280  | 1.87E-09 | 1.01E-06 | receptor ligand activity                                                            |
| GO:0008139                                                          | 20              | -1.074 | 3.65E-09 | 1.85E-06 | nuclear localization sequence binding                                               |
| GO:0043021                                                          | 130             | -0.483 | 7.02E-09 | 3.36E-06 | ribonucleoprotein complex binding                                                   |
| GO:0009055                                                          | 101             | 0.544  | 8.44E-09 | 3.83E-06 | electron transfer activity                                                          |
| GO:0046933                                                          | 15              | 1.187  | 1.08E-08 | 4.64E-06 | proton-transporting ATP synthase activity, rotational mechanism                     |
| GO:0038187                                                          | 12              | 1.256  | 2.72E-08 | 1.12E-04 | pattern recognition receptor activity                                               |
| GO:0042393                                                          | 185             | -0.374 | 5.20E-08 | 2.04E-04 | histone binding                                                                     |
| GO:0004386                                                          | 139             | -0.425 | 9.99E-08 | 3.75E-04 | helicase activity                                                                   |
| GO:0004402                                                          | 60              | -0.624 | 1.07E-07 | 3.84E-04 | histone acetyltransferase activity                                                  |
| GO:0005539                                                          | 199             | 0.342  | 1.72E-07 | 5.75E-04 | glycosaminoglycan binding                                                           |
| GO:0019865                                                          | 20              | 1.025  | 1.80E-07 | 5.75E-04 | immunoglobulin binding                                                              |
| GO:1990380                                                          | 14              | -1.369 | 1.75E-07 | 5.75E-04 | Lys48-specific deubiquitinase activity                                              |

|                   |     |        |          |          |                                                           |
|-------------------|-----|--------|----------|----------|-----------------------------------------------------------|
| <b>GO:0016887</b> | 402 | -0.241 | 1.96E-07 | 6.04E-04 | ATPase activity                                           |
| <b>GO:0031624</b> | 31  | -0.894 | 2.44E-07 | 7.25E-04 | ubiquitin conjugating enzyme binding                      |
| <b>GO:0004674</b> | 430 | -0.228 | 3.15E-07 | 9.04E-04 | protein serine/threonine kinase activity                  |
| <b>GO:0061659</b> | 221 | -0.315 | 4.16E-07 | 1.16E-03 | ubiquitin-like protein ligase activity                    |
| <b>GO:0003713</b> | 313 | -0.258 | 6.30E-07 | 1.70E-03 | transcription coactivator activity                        |
| <b>GO:0005178</b> | 126 | 0.406  | 6.75E-07 | 1.76E-03 | integrin binding                                          |
| <b>GO:0140030</b> | 138 | -0.391 | 7.40E-07 | 1.88E-03 | modification-dependent protein binding                    |
| <b>GO:0043022</b> | 56  | -0.605 | 9.22E-07 | 2.21E-03 | ribosome binding                                          |
| <b>GO:0061630</b> | 216 | -0.307 | 9.22E-07 | 2.21E-03 | ubiquitin protein ligase activity                         |
| <b>GO:0061733</b> | 62  | -0.561 | 9.86E-07 | 2.30E-03 | peptide-lysine-N-acetyltransferase activity               |
| <b>GO:0070492</b> | 11  | 1.194  | 1.23E-06 | 2.79E-03 | oligosaccharide binding                                   |
| <b>GO:0044390</b> | 37  | -0.747 | 1.96E-06 | 4.33E-03 | ubiquitin-like protein conjugating enzyme binding         |
| <b>GO:0034212</b> | 71  | -0.512 | 2.02E-06 | 4.36E-03 | peptide N-acetyltransferase activity                      |
| <b>GO:0032452</b> | 23  | -0.845 | 2.69E-06 | 5.52E-03 | histone demethylase activity                              |
| <b>GO:0140457</b> | 23  | -0.845 | 2.69E-06 | 5.52E-03 | protein demethylase activity                              |
| <b>GO:0004364</b> | 24  | 0.796  | 4.65E-06 | 9.33E-03 | glutathione transferase activity                          |
| <b>GO:0043295</b> | 10  | 1.109  | 5.55E-06 | 1.06E-02 | glutathione binding                                       |
| <b>GO:1900750</b> | 10  | 1.109  | 5.55E-06 | 1.06E-02 | oligopeptide binding                                      |
| <b>GO:0019843</b> | 61  | 0.536  | 5.85E-06 | 1.10E-02 | rRNA binding                                              |
| <b>GO:0032454</b> | 11  | -1.060 | 6.85E-06 | 1.26E-02 | histone demethylase activity (H3-K9 specific)             |
| <b>GO:0070063</b> | 59  | -0.535 | 7.41E-06 | 1.33E-02 | RNA polymerase binding                                    |
| <b>GO:0140098</b> | 300 | -0.225 | 1.16E-04 | 2.04E-02 | catalytic activity, acting on RNA                         |
| <b>GO:0008757</b> | 148 | -0.317 | 1.29E-04 | 2.20E-02 | S-adenosylmethionine-dependent methyltransferase activity |
| <b>GO:0016741</b> | 212 | -0.265 | 1.30E-04 | 2.20E-02 | transferase activity, transferring one-carbon groups      |
| <b>GO:0005125</b> | 185 | 0.282  | 1.36E-04 | 2.25E-02 | cytokine activity                                         |
| <b>GO:0008201</b> | 146 | 0.316  | 1.47E-04 | 2.39E-02 | heparin binding                                           |
| <b>GO:0001540</b> | 73  | 0.453  | 1.71E-04 | 2.71E-02 | amyloid-beta binding                                      |
| <b>GO:0008168</b> | 202 | -0.266 | 1.73E-04 | 2.71E-02 | methyltransferase activity                                |
| <b>GO:0001098</b> | 56  | -0.510 | 1.98E-04 | 2.95E-02 | basal transcription machinery binding                     |
| <b>GO:0001099</b> | 56  | -0.510 | 1.98E-04 | 2.95E-02 | basal RNA polymerase II transcription machinery binding   |
| <b>GO:0043175</b> | 44  | -0.581 | 1.95E-04 | 2.95E-02 | RNA polymerase core enzyme binding                        |
| <b>GO:0016790</b> | 35  | 0.615  | 2.12E-04 | 3.09E-02 | thiolester hydrolase activity                             |
| <b>GO:0000993</b> | 37  | -0.630 | 2.15E-04 | 3.09E-02 | RNA polymerase II complex binding                         |

| GO:0016811                                                                 | 67              | 0.447  | 2.53E-04 | 3.55E-02 | hydrolase activity, acting on carbon-nitrogen (but not peptide) bonds, in linear amides |
|----------------------------------------------------------------------------|-----------------|--------|----------|----------|-----------------------------------------------------------------------------------------|
| GO:0008080                                                                 | 83              | -0.405 | 2.55E-04 | 3.55E-02 | N-acetyltransferase activity                                                            |
| GO:0019213                                                                 | 41              | 0.578  | 2.91E-04 | 3.99E-02 | deacetylase activity                                                                    |
| GO:0042800                                                                 | 16              | -0.940 | 3.12E-04 | 4.14E-02 | histone methyltransferase activity (H3-K4 specific)                                     |
| GO:0050681                                                                 | 43              | -0.559 | 3.08E-04 | 4.14E-02 | androgen receptor binding                                                               |
| <b>Cellular components in Genetic group 2 in the most efficient group.</b> |                 |        |          |          |                                                                                         |
| Go term                                                                    | Number of genes | LOR*   | pvalue   | padj     | Cellular components                                                                     |
| GO:0044391                                                                 | 182             | 1.007  | 7.02E-20 | 3.81E-17 | ribosomal subunit                                                                       |
| GO:0098798                                                                 | 239             | 0.692  | 5.93E-24 | 1.61E-20 | mitochondrial protein complex                                                           |
| GO:0005840                                                                 | 229             | 0.723  | 2.60E-23 | 4.71E-20 | ribosome                                                                                |
| GO:0098800                                                                 | 116             | 0.996  | 6.21E-23 | 8.43E-20 | inner mitochondrial membrane protein complex                                            |
| GO:0015934                                                                 | 115             | 0.937  | 1.16E-22 | 1.26E-19 | large ribosomal subunit                                                                 |
| GO:0022625                                                                 | 58              | 1.194  | 1.22E-19 | 1.10E-16 | cytosolic large ribosomal subunit                                                       |
| GO:0005747                                                                 | 43              | 1.288  | 7.20E-18 | 5.59E-15 | mitochondrial respiratory chain complex I                                               |
| GO:0030964                                                                 | 43              | 1.288  | 1.46E-17 | 9.93E-15 | NADH dehydrogenase complex                                                              |
| GO:0045271                                                                 | 43              | 1.288  | 6.69E-17 | 3.31E-14 | respiratory chain complex I                                                             |
| GO:0022626                                                                 | 105             | 1.114  | 6.69E-17 | 3.31E-14 | cytosolic ribosome                                                                      |
| GO:0098803                                                                 | 69              | 1.159  | 6.69E-17 | 3.31E-14 | respiratory chain complex                                                               |
| GO:0005746                                                                 | 74              | 1.041  | 1.29E-16 | 5.83E-14 | mitochondrial respirasome                                                               |
| GO:0070469                                                                 | 81              | 0.997  | 2.92E-16 | 1.22E-13 | respirasome                                                                             |
| GO:0062023                                                                 | 375             | 0.425  | 5.11E-16 | 1.98E-13 | collagen-containing extracellular matrix                                                |
| GO:0031012                                                                 | 488             | 0.368  | 1.48E-15 | 5.36E-13 | extracellular matrix                                                                    |
| GO:0005743                                                                 | 435             | 0.380  | 9.92E-15 | 3.37E-12 | mitochondrial inner membrane                                                            |
| GO:0005753                                                                 | 18              | 1.524  | 2.03E-14 | 6.11E-12 | mitochondrial proton-transporting ATP synthase complex                                  |
| GO:0045259                                                                 | 18              | 1.524  | 2.03E-14 | 6.11E-12 | proton-transporting ATP synthase complex                                                |
| GO:0015935                                                                 | 70              | 1.092  | 4.97E-14 | 1.42E-11 | small ribosomal subunit                                                                 |
| GO:1990204                                                                 | 101             | 0.726  | 2.31E-13 | 6.27E-10 | oxidoreductase complex                                                                  |
| GO:0019866                                                                 | 492             | 0.299  | 8.54E-12 | 2.21E-09 | organelle inner membrane                                                                |
| GO:0000313                                                                 | 86              | 0.703  | 1.47E-11 | 3.47E-09 | organellar ribosome                                                                     |
| GO:0005761                                                                 | 86              | 0.703  | 1.47E-11 | 3.47E-09 | mitochondrial ribosome                                                                  |
| GO:0060205                                                                 | 307             | 0.331  | 1.42E-09 | 3.20E-07 | cytoplasmic vesicle lumen                                                               |
| GO:0005925                                                                 | 400             | 0.283  | 3.10E-09 | 6.74E-07 | focal adhesion                                                                          |
| GO:0034774                                                                 | 303             | 0.322  | 3.93E-09 | 8.22E-07 | secretory granule lumen                                                                 |
| GO:0030055                                                                 | 407             | 0.277  | 4.85E-09 | 9.50E-07 | cell-substrate junction                                                                 |
| GO:0031983                                                                 | 309             | 0.317  | 4.90E-09 | 9.50E-07 | vesicle lumen                                                                           |
| GO:0005775                                                                 | 158             | 0.433  | 1.01E-08 | 1.90E-06 | vacuolar lumen                                                                          |

|                   |     |        |          |          |                                                   |
|-------------------|-----|--------|----------|----------|---------------------------------------------------|
| <b>GO:0034708</b> | 108 | -0.522 | 1.29E-08 | 2.33E-05 | methyltransferase complex                         |
| <b>GO:0022627</b> | 42  | 1.331  | 1.39E-08 | 2.43E-06 | cytosolic small ribosomal subunit                 |
| <b>GO:0070820</b> | 151 | 0.425  | 3.38E-08 | 5.73E-06 | tertiary granule                                  |
| <b>GO:0000315</b> | 56  | 0.671  | 4.96E-08 | 7.81E-06 | organellar large ribosomal subunit                |
| <b>GO:0005762</b> | 56  | 0.671  | 4.96E-08 | 7.81E-06 | mitochondrial large ribosomal subunit             |
| <b>GO:0016607</b> | 380 | -0.262 | 5.03E-08 | 7.81E-06 | nuclear speck                                     |
| <b>GO:0005798</b> | 157 | -0.404 | 8.54E-08 | 1.29E-04 | Golgi-associated vesicle                          |
| <b>GO:0043202</b> | 92  | 0.520  | 8.90E-08 | 1.31E-04 | lysosomal lumen                                   |
| <b>GO:0008023</b> | 52  | -0.687 | 1.65E-07 | 2.36E-04 | transcription elongation factor complex           |
| <b>GO:0000151</b> | 272 | -0.294 | 1.86E-07 | 2.59E-04 | ubiquitin ligase complex                          |
| <b>GO:0035097</b> | 81  | -0.551 | 1.97E-07 | 2.68E-04 | histone methyltransferase complex                 |
| <b>GO:0098552</b> | 466 | 0.223  | 2.34E-07 | 3.10E-04 | side of membrane                                  |
| <b>GO:0035770</b> | 206 | -0.332 | 2.64E-07 | 3.41E-04 | ribonucleoprotein granule                         |
| <b>GO:0005581</b> | 93  | 0.484  | 3.68E-07 | 4.65E-04 | collagen trimer                                   |
| <b>GO:0031965</b> | 289 | -0.274 | 4.09E-07 | 5.05E-04 | nuclear membrane                                  |
| <b>GO:0042581</b> | 151 | 0.374  | 5.66E-07 | 6.83E-04 | specific granule                                  |
| <b>GO:1904724</b> | 52  | 0.634  | 6.43E-07 | 7.59E-04 | tertiary granule lumen                            |
| <b>GO:0010494</b> | 58  | -0.621 | 7.67E-07 | 8.86E-04 | cytoplasmic stress granule                        |
| <b>GO:0016469</b> | 46  | 0.722  | 8.61E-07 | 9.54E-04 | proton-transporting two-sector ATPase complex     |
| <b>GO:0036464</b> | 195 | -0.323 | 8.45E-07 | 9.54E-04 | cytoplasmic ribonucleoprotein granule             |
| <b>GO:0034399</b> | 133 | -0.386 | 1.25E-06 | 1.36E-03 | nuclear periphery                                 |
| <b>GO:0070971</b> | 19  | -1.157 | 1.38E-06 | 1.47E-03 | endoplasmic reticulum exit site                   |
| <b>GO:0031248</b> | 91  | -0.460 | 1.70E-06 | 1.75E-03 | protein acetyltransferase complex                 |
| <b>GO:1902493</b> | 91  | -0.460 | 1.70E-06 | 1.75E-03 | acetyltransferase complex                         |
| <b>GO:0016234</b> | 80  | -0.481 | 2.25E-06 | 2.26E-03 | inclusion body                                    |
| <b>GO:0000123</b> | 81  | -0.477 | 2.52E-06 | 2.49E-03 | histone acetyltransferase complex                 |
| <b>GO:0042788</b> | 30  | 0.990  | 4.09E-06 | 3.97E-03 | polysomal ribosome                                |
| <b>GO:0005635</b> | 436 | -0.195 | 5.92E-06 | 5.64E-03 | nuclear envelope                                  |
| <b>GO:0005766</b> | 138 | 0.343  | 7.37E-06 | 6.56E-03 | primary lysosome                                  |
| <b>GO:0042582</b> | 138 | 0.343  | 7.37E-06 | 6.56E-03 | azurophil granule                                 |
| <b>GO:0005643</b> | 75  | -0.463 | 7.36E-06 | 6.56E-03 | nuclear pore                                      |
| <b>GO:0044322</b> | 23  | -0.957 | 7.28E-06 | 6.56E-03 | endoplasmic reticulum quality control compartment |
| <b>GO:1902911</b> | 104 | -0.398 | 8.06E-06 | 7.06E-03 | protein kinase complex                            |
| <b>GO:0030134</b> | 73  | -0.483 | 1.03E-04 | 8.89E-03 | COPII-coated ER to Golgi transport vesicle        |
| <b>GO:0016363</b> | 105 | -0.385 | 1.05E-04 | 8.94E-03 | nuclear matrix                                    |
| <b>GO:0005667</b> | 405 | -0.195 | 1.08E-04 | 9.03E-03 | transcription regulator complex                   |
| <b>GO:0030667</b> | 277 | 0.235  | 1.15E-04 | 9.46E-03 | secretory granule membrane                        |

|                   |     |        |          |          |                                                                |
|-------------------|-----|--------|----------|----------|----------------------------------------------------------------|
| <b>GO:0061695</b> | 245 | -0.248 | 1.26E-04 | 1.02E-02 | transferase complex, transferring phosphorus-containing groups |
| <b>GO:1904949</b> | 76  | -0.451 | 1.33E-04 | 1.06E-02 | ATPase complex                                                 |
| <b>GO:0005750</b> | 10  | 1.026  | 1.84E-04 | 1.42E-02 | mitochondrial respiratory chain complex III                    |
| <b>GO:0045275</b> | 10  | 1.026  | 1.84E-04 | 1.42E-02 | respiratory chain complex III                                  |
| <b>GO:0030660</b> | 94  | -0.398 | 1.86E-04 | 1.42E-02 | Golgi-associated vesicle membrane                              |
| <b>GO:0000314</b> | 28  | 0.730  | 2.20E-04 | 1.64E-02 | organellar small ribosomal subunit                             |
| <b>GO:0005763</b> | 28  | 0.730  | 2.20E-04 | 1.64E-02 | mitochondrial small ribosomal subunit                          |
| <b>GO:0070069</b> | 25  | 0.797  | 2.25E-04 | 1.65E-02 | cytochrome complex                                             |
| <b>GO:0031984</b> | 337 | -0.203 | 2.28E-04 | 1.65E-02 | organelle subcompartment                                       |
| <b>GO:0045335</b> | 123 | 0.336  | 2.62E-04 | 1.87E-02 | phagocytic vesicle                                             |
| <b>GO:0098791</b> | 317 | -0.205 | 3.13E-04 | 2.21E-02 | Golgi apparatus subcompartment                                 |
| <b>GO:0019908</b> | 12  | -1.119 | 3.20E-04 | 2.23E-02 | nuclear cyclin-dependent protein kinase holoenzyme complex     |
| <b>GO:0030135</b> | 264 | -0.220 | 4.18E-04 | 2.88E-02 | coated vesicle                                                 |
| <b>GO:0009295</b> | 43  | -0.536 | 4.39E-04 | 2.94E-02 | nucleoid                                                       |
| <b>GO:0042645</b> | 43  | -0.536 | 4.39E-04 | 2.94E-02 | mitochondrial nucleoid                                         |
| <b>GO:0043235</b> | 382 | 0.181  | 4.65E-04 | 3.04E-02 | receptor complex                                               |
| <b>GO:0070603</b> | 72  | -0.423 | 4.61E-04 | 3.04E-02 | SWI/SNF superfamily-type complex                               |
| <b>GO:0016605</b> | 94  | -0.362 | 5.18E-04 | 3.35E-02 | PML body                                                       |
| <b>GO:0012507</b> | 43  | -0.583 | 5.32E-04 | 3.40E-02 | ER to Golgi transport vesicle membrane                         |
| <b>GO:0009897</b> | 283 | 0.207  | 5.55E-04 | 3.50E-02 | external side of plasma membrane                               |
| <b>GO:0005788</b> | 299 | 0.201  | 5.73E-04 | 3.58E-02 | endoplasmic reticulum lumen                                    |
| <b>GO:0030120</b> | 56  | -0.483 | 6.33E-04 | 3.91E-02 | vesicle coat                                                   |
| <b>GO:0000790</b> | 342 | -0.186 | 6.65E-04 | 4.06E-02 | nuclear chromatin                                              |
| <b>GO:0031588</b> | 13  | -0.943 | 7.69E-04 | 4.64E-02 | nucleotide-activated protein kinase complex                    |
