# Supplementary material for: Transcriptome Profiling of the Liver in Nellore Cattle Phenotypically Divergent for RFI in Two Genetic Groups
Source: MDPI journal article supplement (doi:10.3390/ani13030359), 2023-01-20
Supplement: s1 [file s1]

**Table S1.** Descriptive statistics for alignment parameter using HITSAT2.

| GENETIC GROUP 1 |            |                    |                            |
|-----------------|------------|--------------------|----------------------------|
| SEQUENCE ID     | Raw reads  | Clean Reads (Mb)   | Overall alignment rate (%) |
| 1               | 23,225,642 | 19,014,864         | 81.87013302                |
| 2               | 20,051,086 | 17,212,955         | 85.84549984                |
| 3               | 18,988,306 | 15,889,039         | 83.67802267                |
| 4               | 20,205,500 | 17,574,112         | 86.97687263                |
| 5               | 18,829,397 | 16,264,153         | 86.37638794                |
| 6               | 20,146,026 | 17,381,814         | 86.27912026                |
| 7               | 18,249,944 | 16,186,137         | 88.69143379                |
| 8               | 19,573,711 | 16,880,873         | 86.24257812                |
| 9               | 17,903,628 | 15,736,760         | 87.89704522                |
| 10              | 19,769,426 | 17,087,279         | 86.43285344                |
| 11              | 17,534,365 | 15,482,048         | 88.29545866                |
| 12              | 21,066,221 | 15,814,760         | 75.07165144                |
| 13              | 22,230,830 | 18,936,800         | 85.18260452                |
| 14              | 20,087,642 | 17,272,061         | 85.98351663                |
| 15              | 17,484,201 | 15,082,220         | 86.26199161                |
| 16              | 20,735,282 | 18,109,819         | 87.33818522                |
| 17              | 18,991,037 | 15,699,968         | 82.6704092                 |
| 18              | 16,449,275 | 14,561,444         | 88.5233179                 |
| 19              | 20,211,361 | 17,472,382         | 86.44831983                |
| 20              | 20,560,712 | 17,973,022         | 87.41439499                |
| 21              | 17,944,043 | 15,322,488         | 85.39038833                |
| 22              | 17,679,765 | 15,634,492         | 88.43156003                |
| 23              | 17,659,388 | 15,043,701         | 85.18812203                |
| 24              | 19,262,155 | 16,550,940         | 85.92465381                |
| MEAN            | 19,368,289 | 16,591,005         | 85.66066527                |
| GENETIC GROUP 2 |            |                    |                            |
| SEQUENCE ID     | Reads raw  | Reads cleaned (Mb) | Overall alignment rate (%) |
| 1               | 8,205,798  | 7,254,724          | 88.40973175                |
| 2               | 12,342,938 | 10,774,148         | 87.2899791                 |
| 3               | 11,174,277 | 9,899,320          | 88.59025063                |
| 4               | 9,411,232  | 8,328,025          | 88.49027417                |
| 5               | 10,210,766 | 9,017,716          | 88.31576397                |
| 6               | 10,441,025 | 9,227,088          | 88.37339246                |
| 7               | 10,691,977 | 9,361,547          | 87.55674465                |
| 8               | 8,200,461  | 7,328,352          | 89.36512228                |
| 9               | 10,407,413 | 9,191,569          | 88.31751945                |
| 10              | 9,680,276  | 8,322,409          | 85.97284829                |
| 11              | 10,977,085 | 9,747,828          | 88.80160808                |
| 12              | 9,609,337  | 8,581,017          | 89.29874142                |
| 13              | 9,711,313  | 8,588,163          | 88.43462259                |
| 14              | 8,758,872  | 7,734,901          | 88.30932796                |
| 15              | 10,250,216 | 8,932,195          | 87.14152951                |
| 16              | 9,346,752  | 8,236,241          | 88.1187497                 |
| 17              | 12,612,367 | 11,168,260         | 88.55007153                |
| 18              | 8,100,136  | 7,143,194          | 88.18609959                |
| 19              | 9,168,261  | 8,114,508          | 88.50651176                |
| 20              | 9,867,034  | 8,820,733          | 89.39599276                |
| MEAN            | 19,916,754 | 17,577,194         | 88.25330751                |
