# Supplementary material for: Transcriptome Profiling of the Liver in Nellore Cattle Phenotypically Divergent for RFI in Two Genetic Groups
Source: MDPI journal article supplement (doi:10.3390/ani13030359), 2023-01-20
Supplement: s1 [file s1]

**Table S5.** The significant biological processes related to Energy Metabolism. Protein turnover, and Redox homeostasis and immune system in genetic group 2 in the most efficient group.

| Go Term           | Number of genes | LOR*   | p-value               | padj                  | Biological process                                                                        |
|-------------------|-----------------|--------|-----------------------|-----------------------|-------------------------------------------------------------------------------------------|
| <b>GO:1901570</b> | 88              | 0.397  | $2.2 \times 10^{-04}$ | $3.7 \times 10^{-02}$ | fatty acid derivative biosynthetic process                                                |
| <b>GO:0031663</b> | 54              | 0.570  | $5.9 \times 10^{-05}$ | $1.3 \times 10^{-02}$ | lipopolysaccharide-mediated signaling pathway                                             |
| <b>GO:0005978</b> | 49              | -0.549 | $1.5 \times 10^{-04}$ | $2.7 \times 10^{-02}$ | glycogen biosynthetic process                                                             |
| <b>GO:0009250</b> | 49              | -0.549 | $1.5 \times 10^{-04}$ | $2.7 \times 10^{-02}$ | glucan biosynthetic process                                                               |
| <b>GO:0006110</b> | 72              | -0.524 | $1.5 \times 10^{-05}$ | $4.7 \times 10^{-03}$ | regulation of glycolytic process                                                          |
| <b>GO:0002718</b> | 63              | 0.474  | $3.3 \times 10^{-04}$ | $5.1 \times 10^{-03}$ | regulation of cytokine production involved in immune response                             |
| <b>GO:0042149</b> | 40              | -0.697 | $8.7 \times 10^{-06}$ | $2.9 \times 10^{-02}$ | cellular response to glucose starvation                                                   |
| <b>GO:0006120</b> | 46              | 1.141  | $2.9 \times 10^{-12}$ | $6.8 \times 10^{-09}$ | mitochondrial electron transport, NADH to ubiquinone                                      |
| <b>GO:0042773</b> | 81              | -1.199 | $2.5 \times 10^{-07}$ | $1.7 \times 10^{-03}$ | ATP synthesis coupled electron transport                                                  |
| <b>GO:1901685</b> | 19              | 1.047  | $1.3 \times 10^{-07}$ | $1.0 \times 10^{-04}$ | glutathione derivative metabolic process                                                  |
| <b>GO:1901687</b> | 19              | 1.047  | $1.3 \times 10^{-07}$ | $1.0 \times 10^{-04}$ | glutathione derivative biosynthetic process                                               |
| <b>GO:1990748</b> | 102             | 0.362  | $2.6 \times 10^{-04}$ | $4.2 \times 10^{-02}$ | cellular detoxification                                                                   |
| <b>GO:0097237</b> | 110             | 0.357  | $1.9 \times 10^{-04}$ | $3.2 \times 10^{-02}$ | cellular response to toxic substance                                                      |
| <b>GO:0006614</b> | 94              | 1.139  | $6.3 \times 10^{-18}$ | $1.2 \times 10^{-13}$ | SRP-dependent cotranslational protein targeting to membrane                               |
| <b>GO:2001056</b> | 135             | 0.408  | $2.9 \times 10^{-06}$ | $1.3 \times 10^{-03}$ | positive regulation of cysteine-type endopeptidase activity                               |
| <b>GO:0010952</b> | 172             | 0.350  | $6.4 \times 10^{-06}$ | $2.4 \times 10^{-03}$ | positive regulation of peptidase activity                                                 |
| <b>GO:0006577</b> | 17              | -0.736 | $1.2 \times 10^{-03}$ | $1.4 \times 10^{-01}$ | amino-acid betaine metabolic process                                                      |
| <b>GO:0052548</b> | 358             | 0.225  | $2.6 \times 10^{-05}$ | $6.6 \times 10^{-03}$ | regulation of endopeptidase activity                                                      |
| <b>GO:2001056</b> | 135             | 0.408  | $2.9 \times 10^{-06}$ | $1.3 \times 10^{-03}$ | positive regulation of cysteine-type endopeptidase activity                               |
| <b>GO:0043280</b> | 118             | 0.408  | $1.2 \times 10^{-05}$ | $3.8 \times 10^{-03}$ | positive regulation of cysteine-type endopeptidase activity involved in apoptotic process |
| <b>GO:0007249</b> | 253             | 0.222  | $4.7 \times 10^{-04}$ | $6.5 \times 10^{-02}$ | I-kappaB kinase/NF-kappaB signaling                                                       |
| <b>GO:0043123</b> | 176             | 0.276  | $2.9 \times 10^{-04}$ | $4.5 \times 10^{-02}$ | positive regulation of I-kappaB kinase/NF-kappaB signaling                                |
| <b>GO:0000186</b> | 55              | -0.572 | $4.2 \times 10^{-05}$ | $9.8 \times 10^{-03}$ | activation of MAPKK activity                                                              |
| <b>GO:0032963</b> | 98              | 0.594  | $7.8 \times 10^{-09}$ | $8.8 \times 10^{-06}$ | collagen metabolic process                                                                |
| <b>GO:0030574</b> | 42              | 0.619  | $5.2 \times 10^{-05}$ | $1.1 \times 10^{-03}$ | collagen catabolic process                                                                |
| <b>GO:2000251</b> | 19              | 0.827  | $2.1 \times 10^{-04}$ | $3.5 \times 10^{-02}$ | positive regulation of actin cytoskeleton reorganization                                  |

|                   |     |        |                       |                       |                                                                |
|-------------------|-----|--------|-----------------------|-----------------------|----------------------------------------------------------------|
| <b>GO:0001516</b> | 24  | 0.794  | $1.6 \times 10^{-04}$ | $2.8 \times 10^{-02}$ | prostaglandin biosynthetic process                             |
| <b>GO:0018107</b> | 114 | -0.364 | $1.4 \times 10^{-04}$ | $2.5 \times 10^{-02}$ | peptidyl-threonine phosphorylation                             |
| <b>GO:0052547</b> | 383 | 0.238  | $4.6 \times 10^{-06}$ | $1.9 \times 10^{-03}$ | regulation of peptidase activity                               |
| <b>GO:0002283</b> | 449 | 0.328  | $1.3 \times 10^{-06}$ | $2.6 \times 10^{-08}$ | neutrophil activation involved in immune response              |
| <b>GO:0002446</b> | 460 | 0.329  | $6.4 \times 10^{-12}$ | $1.4 \times 10^{-08}$ | neutrophil mediated immunity                                   |
| <b>GO:0002694</b> | 476 | 0.283  | $1.6 \times 10^{-09}$ | $2.1 \times 10^{-06}$ | regulation of leukocyte activation                             |
| <b>GO:0050867</b> | 306 | 0.349  | $2.3 \times 10^{-09}$ | $3.0 \times 10^{-08}$ | positive regulation of cell activation                         |
| <b>GO:0002250</b> | 352 | 0.279  | $2.8 \times 10^{-07}$ | $1.9 \times 10^{-04}$ | adaptive immune response                                       |
| <b>GO:0042110</b> | 431 | 0.226  | $3.8 \times 10^{-06}$ | $1.6 \times 10^{-03}$ | T cell activation                                              |
| <b>GO:0033006</b> | 30  | 0.863  | $7.5 \times 10^{-06}$ | $2.6 \times 10^{-03}$ | regulation of mast cell activation involved in immune response |
| <b>GO:0002697</b> | 351 | 0.241  | $8.7 \times 10^{-07}$ | $2.9 \times 10^{-03}$ | regulation of immune effector process                          |

\*The LOR (Logarithm Of Ratio) refer to LRFI group, this value positions each biological process in a classification in relation to the rest (total), being able to identify biological processes, molecular mechanisms and significant cellular components and their regulation within the groups.
